# Supplementary material for: Metal-free DBU promoted regioselective synthesis of isoxazoles and isoxazolines
Source: Royal Society of Chemistry journal article supplement (doi:10.1039/c4ra14694h), 2014-12-03
Supplement: c4ra14694h1.pdf [file c4ra14694h1.pdf]

**Electronic Supporting Information (ESI)**

**Metal-free DBU promoted regioselective  
synthesis of isoxazoles and isoxazolines<sup>†</sup>**

**Shabber Mohammed,<sup>ab</sup> Ram A. Vishwakarma,<sup>ab</sup> and Sandip B. Bharate<sup>ab\*</sup>**

*<sup>a</sup>Medicinal Chemistry Division, CSIR-Indian Institute of Integrative Medicine, Canal Road,  
Jammu-180001, India.*

*<sup>b</sup>Academy of Scientific & Innovative Research (AcSIR), CSIR-Indian Institute of Integrative  
Medicine, Canal Road, Jammu-180001, India.*

*\*E-mail: [sbharate@iiim.ac.in](mailto:sbharate@iiim.ac.in); [sandipbharate@gmail.com](mailto:sandipbharate@gmail.com)*

*Fax: +91-191-2569333; Tel: +91-191-2569000 (Extn. 345)*

<sup>†</sup> IIIM Publication Number. IIIM/1723/2014

## CONTENTS

| Sr. No. | Section                                                                                                                             | Page no |
|---------|-------------------------------------------------------------------------------------------------------------------------------------|---------|
| S1.     | Experimental procedures                                                                                                             | S4      |
| S2.     | Spectral data of isoxazole/isoxazolines                                                                                             | S5-17   |
| S3.     | Scanned copies of <sup>1</sup> H, <sup>13</sup> C and DEPT135 NMR spectra's of Isoxazole/ isoxazolines                              | S18     |
| S3.1    | <sup>1</sup> H, <sup>13</sup> C and DEPT135 NMR spectra of 4-(5-phenylisoxazol-3-yl)phenol ( <b>4a</b> )                            | S18-19  |
| S3.2    | <sup>1</sup> H, <sup>13</sup> C and DEPT135 NMR spectra of spectra's of 3,5-diphenylisoxazole ( <b>4b</b> )                         | S20     |
| S3.3    | <sup>1</sup> H, <sup>13</sup> C and DEPT135 NMR spectra of 3-(4-methoxyphenyl)-5-phenylisoxazole ( <b>4c</b> )                      | S21-22  |
| S3.4    | <sup>1</sup> H, <sup>13</sup> C and DEPT135 NMR spectra of 5-phenyl-3-(p-tolyl)isoxazole ( <b>4d</b> )                              | S23-24  |
| S3.5    | <sup>1</sup> H, <sup>13</sup> C and DEPT135 NMR spectra of 5-phenyl-3-(o-tolyl)isoxazole ( <b>4e</b> )                              | S25-26  |
| S3.6    | <sup>1</sup> H, <sup>13</sup> C and DEPT135 NMR spectra of 4-(5-(4-(tert-butyl)phenyl)isoxazol-3-yl)phenol ( <b>4f</b> )            | S27-28  |
| S3.7    | <sup>1</sup> H, <sup>13</sup> C, and DEPT135 NMR spectra of 4-(5-(4-ethylphenyl)isoxazole-3-yl)phenol ( <b>4g</b> )                 | S29-30  |
| S3.8    | <sup>1</sup> H, <sup>13</sup> C and DEPT135 NMR spectra of 1-((3-(p-tolyl) isoxazol-5-yl)methyl)indoline-2,3-dione ( <b>4h</b> )    | S31-32  |
| S3.9    | <sup>1</sup> H, <sup>13</sup> C and DEPT135 NMR spectra of 3-(3-(p-tolyl)isoxazole-5-yl)phenol ( <b>4i</b> )                        | S33-34  |
| S3.10   | <sup>1</sup> H, <sup>13</sup> C and DEPT135 NMR spectra of 4-(5-(hydroxymethyl)isoxazole-3-yl)phenol ( <b>4j</b> )                  | S35-36  |
| S3.11   | <sup>1</sup> H, <sup>13</sup> C and DEPT135 NMR spectra of 3-(1H-indol-3-yl)-5-phenylisoxazole ( <b>4k</b> )                        | S37-38  |
| S3.12   | <sup>1</sup> H, <sup>13</sup> C and DEPT135 NMR spectra of 5-phenyl-3-(pyridine-2-yl) isoxazole ( <b>4l</b> )                       | S39-40  |
| S3.13   | <sup>1</sup> H, <sup>13</sup> C, and DEPT135 spectra of 3,5-diphenyl-4,5-dihydroisoxazole ( <b>6a</b> )                             | S41-42  |
| S3.14   | <sup>1</sup> H, <sup>13</sup> C, and DEPT135 spectra of 4-(5-(4-fluorophenyl)-4,5-dihydroisoxazol-3-yl)phenol ( <b>6b</b> )         | S43-44  |
| S3.15   | <sup>1</sup> H, <sup>13</sup> C and DEPT135 NMR spectra of 3-(2-ethoxyphenyl)-5-(4-fluorophenyl)-4,5-dihydroisoxazole ( <b>6c</b> ) | S45-46  |
| S3.16   | <sup>1</sup> H, <sup>13</sup> C and DEPT135 NMR spectra of 4-(5-phenyl-4,5-dihydroisoxazole-3-yl)phenol ( <b>6d</b> )               | S47-48  |
| S3.17   | <sup>1</sup> H, <sup>13</sup> C and DEPT135 NMR spectra of 3-(4-methoxyphenyl)-5-phenyl-4,5-dihydroisoxazole ( <b>6e</b> )          | S49     |
| S3.18   | <sup>1</sup> H, <sup>13</sup> C and DEPT135 NMR spectra of 5-phenyl-3-(p-tolyl)-4,5-dihydroisoxazole ( <b>6f</b> )                  | S50-51  |
| S3.19   | <sup>1</sup> H, <sup>13</sup> C, and DEPT135 NMR spectra of 5-phenyl-3-(o-tolyl)-4,5-dihydroisoxazole ( <b>6g</b> )                 | S52-53  |
| S3.20   | <sup>1</sup> H, <sup>13</sup> C, DEPT135 NMR spectra of 5-(3,4-dimethoxyphenyl)-3-phenyl-4,5-dihydroisoxazole ( <b>6h</b> )         | S54-55  |
| S3.21   | <sup>1</sup> H, <sup>13</sup> C and DEPT135 NMR spectra of 5-(3,4-dimethoxyphenyl)-3-(p-tolyl)-4,5-dihydroisoxazole ( <b>6i</b> )   | S56-57  |
| S3.22   | <sup>1</sup> H, <sup>13</sup> C and DEPT135 NMR spectra of 5-(4-fluorophenyl)-3-(4-methoxyphenyl)-4,5-                              | S58-59  |

|        |                                                                                                                                         |        |
|--------|-----------------------------------------------------------------------------------------------------------------------------------------|--------|
|        | dihydroisoxazole ( <b>6j</b> )                                                                                                          |        |
| S3.23  | <sup>1</sup> H, <sup>13</sup> C and DEPT135 NMR spectra of 5-(4-fluorophenyl)-3-phenyl-4,5-dihydroisoxazole ( <b>6k</b> )               | S60-61 |
| S3.24  | <sup>1</sup> H, <sup>13</sup> C and DEPT135 NMR spectra of 5-(4-fluorophenyl)-3-(p-tolyl)-4,5-dihydroisoxazole ( <b>6l</b> )            | S62-63 |
| S3.25  | <sup>1</sup> H, <sup>13</sup> C and DEPT135 NMR spectra of 5-phenyl-3-(pyridine-2-yl)-4,5-dihydroisoxazole ( <b>6m</b> )                | S64-65 |
| S3.26  | <sup>1</sup> H, <sup>13</sup> C and DEPT135 NMR spectra of 5-(4-fluorophenyl)-3-(o-tolyl)-4,5-dihydroisoxazole ( <b>6n</b> )            | S66-67 |
| S3.27  | <sup>1</sup> H, <sup>13</sup> C and DEPT135 NMR spectra of 5-(3,4-dimethoxyphenyl)-3-(4-methoxyphenyl)isoxazole ( <b>6o</b> )           | S68-69 |
| S3.28  | <sup>1</sup> H, <sup>13</sup> C and DEPT135 NMR spectra of 5-(3,4-dimethoxyphenyl)-3-(o-tolyl)-4,5-dihydroisoxazole ( <b>6p</b> )       | S70-71 |
| S3.29  | <sup>1</sup> H, <sup>13</sup> C and DEPT135 NMR spectra 3-(1H-indol-3yl)-5-phenyl-4,5-dihydroisoxazole ( <b>6q</b> )                    | S72-73 |
| S3.30  | <sup>1</sup> H, <sup>13</sup> C and DEPT135 NMR spectra of 2-chloro-4-(5-phenylisoxazole-3-yl)phenol ( <b>7a</b> )                      | S74-75 |
| S3.31  | <sup>1</sup> H, <sup>13</sup> C and DEPT135 NMR spectra of 2-chloro-4-(5-(p-tolyl)isoxazole-3-yl)phenol ( <b>7b</b> )                   | S76-77 |
| S3.32  | <sup>1</sup> H, <sup>13</sup> C and DEPT135 NMR spectra of 2-chloro-4-(5-(4-ethylphenyl)isoxazole-3-yl)phenol ( <b>7c</b> )             | S78-79 |
| S3.33  | <sup>1</sup> H, <sup>13</sup> C and DEPT135 NMR spectra of 2-chloro-4-(5-phenylisoxazol-3-yl)phenol ( <b>7d</b> )                       | S80-81 |
| S3.34  | <sup>1</sup> H, <sup>13</sup> C and DEPT135 NMR spectra of 2-chloro-4-(5-(4-fluorophenyl)-4,5-dihydroisoxazole-3yl)phenol ( <b>7e</b> ) | S82-83 |
| S3.35  | <sup>1</sup> H, <sup>13</sup> C and DEPT135 NMR spectra of 3-(5-chlorofuran-2-yl)-5-phenylisoxazole ( <b>7f</b> )                       | S84-85 |
| S3.36  | <sup>1</sup> H, <sup>13</sup> C and DEPT135 NMR spectra of 3-(5-chlorofuran-2-yl)-5-phenyl-4,5-dihydroisoxazole ( <b>7g</b> )           | S86-87 |
| S3.37. | <sup>1</sup> H, <sup>13</sup> C and DEPT135 NMR spectra of 3-(3-chloro-4-methoxyphenyl)-5-phenylisoxazole ( <b>7h</b> )                 | S88-89 |
| S4.    | LC chart at different time intervals                                                                                                    | S90-92 |
| S5.    | References associated with ESI                                                                                                          | S93    |

## **S1. EXPERIMENTAL PROCEDURES**

### **S1.a. General Information**

All chemicals were obtained from Sigma-Aldrich Company and used as received. <sup>1</sup>H, <sup>13</sup>C and DEPT NMR spectra were recorded on Bruker-Avance DPX FT-NMR 500 and 400 MHz instruments. Chemical data for protons are reported in parts per million (ppm) downfield from tetramethylsilane and are referenced to the residual proton in the NMR solvent (CDCl<sub>3</sub>-7.26 and CD<sub>3</sub>OD- 3.28 ppm). Carbon nuclear magnetic resonance spectra (<sup>13</sup>C NMR) were recorded at 125 MHz or 100 MHz: chemical data for carbons are reported in parts per million (ppm, δ scale) downfield from tetramethylsilane and are referenced to the carbon resonance of the solvent (CDCl<sub>3</sub>-77 and CD<sub>3</sub>OD-50 ppm). ESI-MS and HR-ESIMS spectra were recorded on Agilent 1100 LC-Q-TOF and HR-ESIMS-6540-UHD machines. IR spectra were recorded on Perkin-Elmer IR spectrophotometer. Melting points were recorded on digital melting point apparatus.

### **S1.b. General procedure for preparation of aldoximes**

To the solution of hydroxylamine hydrochloride (1 g, 5.88 m mol) in water (5 ml) was added sodium hydroxide (307 mg, 0.5 m mol) and respective aldehydes (1 mmol) and reaction mixture was stirred for 2-3 hrs at room temperature. After completion of the reaction (monitoring by TLC), if compound precipitated out, was filtered on Buckner funnel or extracted with EtOAc (3 × 15 ml). The obtained product was taken for next step without further purification (> 90% yield).

### **S1.c. Optimized procedure for preparation of isoxazole and isoxazolines.**

To the stirred solution of aldoximes (100 mg, 1 mmol) in DMF (3 ml) was added N-chlorosuccinimide (1.2 mmol) at room temperature and reaction was stirred for 0.5-1 h. Then, DBU (1 mmol) and alkynes/alkenes (1.2 mmol) were added and reaction was further stirred for 1-8 h. After completion of the reaction (confirmed by TLC), chilled water (20 ml) was added and product was extracted with EtOAc (3 × 10 ml). The organic layer was collected, dried on anhydrous sodium sulphate and solvent was evaporated on rotary evaporator to get the crude product. The crude product was purified by silica gel (#100-200) column chromatography using 2 to 20% EtOAc: hexane to get pure isoxazole/ isoxazoline products. For synthesis of chloro-substituted isoxazoles/ isoxazolines, similar procedure was used with the use of 2.2 mmol of NCS instead of 1.2 mmol.

## S2. Spectral data of isoxazole and isoxazolines

### S2.1. 4-(5-phenylisoxazol-3-yl) phenol (4a):<sup>1</sup>

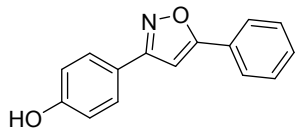

White solid; yield: 80%; m. p. 187-189 °C; <sup>1</sup>H NMR (400 MHz, CDCl<sub>3</sub>, ppm): δ 7.83 (dd, *J* = 4, 8 Hz, 2H), 7.76 (d, *J* = 8 Hz, 2H), 7.47 (m, 3H), 6.95 (d, *J* = 8 Hz, 2H), 6.78 (s, 1H); <sup>13</sup>C NMR (CDCl<sub>3</sub> +CD<sub>3</sub>OD, 125 MHz): δ 170.0, 162.9, 158.8, 130.2, 128.9, 128.2, 127.2, 125.7, 120.0, 115.7, 97.3; IR (CHCl<sub>3</sub>): ν<sub>max</sub> 3433, 2925, 1631, 1450, 1353, 1095, 1017 cm<sup>-1</sup>; ESI-MS: *m/z* 238.08 [M+H]<sup>+</sup>; HR-ESIMS: *m/z* 238.0864 calcd for C<sub>15</sub>H<sub>11</sub>NO<sub>2</sub>+H<sup>+</sup> (238.0864).

### S2.2. 3, 5-diphenylisoxazole (4b):<sup>2</sup>

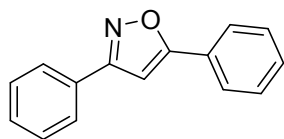

White solid; yield: 75%; m. p. 140-142 °C; <sup>1</sup>H NMR (400 MHz, CDCl<sub>3</sub>, ppm): δ 7.86 (m, 4H), 7.49 (m, 6H), 6.84 (s, 1H); <sup>13</sup>C NMR (CDCl<sub>3</sub>, 125 MHz): δ 168.7, 161.3, 128.6, 128.4, 127.4, 127.3, 127.3, 125.8, 125.1, 124.2, 95.8; IR (CHCl<sub>3</sub>): ν<sub>max</sub> 3437, 3114, 2924, 1462, 1257, 1092, 763 cm<sup>-1</sup>; ESI-MS: *m/z* 222.08 [M+H]<sup>+</sup>; HR-ESIMS: *m/z* 222.0917 calcd for C<sub>15</sub>H<sub>11</sub>NO+H<sup>+</sup> (222.0913).

### S2.3. 3-(4-Methoxyphenyl)-5-phenylisoxazole (4c):<sup>1</sup>

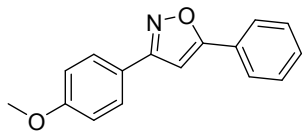

White solid; yield: 72%; m. p. 114-117 °C; <sup>1</sup>H NMR (400 MHz, CDCl<sub>3</sub>, ppm): δ 7.80-7.85 (m, 4H), 7.43-7.51 (m, 3H), 6.99 (d, *J* = 8 Hz, 2H), 6.78 (s, 1H), 3.87 (s, 3H); <sup>13</sup>C NMR (CDCl<sub>3</sub>, 125 MHz): δ 170.1, 162.6, 161.0, 130.1, 129.0, 128.2, 127.5, 125.8, 121.6, 114.3, 97.2, 55.3; IR (CHCl<sub>3</sub>): ν<sub>max</sub> 3433, 2925, 1631, 1450, 1353, 1095, 1017 cm<sup>-1</sup>; IR (CHCl<sub>3</sub>): ν<sub>max</sub> 3436, 2922, 2851, 1613, 1450, 1019, 841 cm<sup>-1</sup>; ESI-MS: *m/z* 252.09 [M+H]<sup>+</sup>; HR-ESIMS: *m/z* 252.1021 calcd for C<sub>16</sub>H<sub>13</sub>NO<sub>2</sub>+H<sup>+</sup> (252.1019).

#### S2.4. 5-Phenyl-3-(p-tolyl)isoxazole (4d):<sup>3</sup>

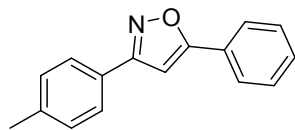

White solid; yield: 88%; m.p. 110-112 °C; <sup>1</sup>H NMR (400 MHz, CDCl<sub>3</sub>, ppm): δ 7.82-7.84 (m, 2H), 7.76 (d, *J* = 8.0 Hz, 2H), 7.42-7.50 (m, 3H), 7.28 (d, *J* = 8.0 Hz, 2H), 6.80 (s, 1H), 2.41 (s, 3H); <sup>13</sup>C NMR (CDCl<sub>3</sub>, 100 MHz): δ 170.1, 162.6, 161.0, 130.1, 129.0, 128.2, 127.5, 125.8, 121.6, 114.3, 97.2, 55.3; IR (CHCl<sub>3</sub>): ν<sub>max</sub> 3433, 2925, 1631, 1450, 1353, 1095, 1017 cm<sup>-1</sup>; ESI-MS: *m/z* 236.10 [M+H]<sup>+</sup>; HR-ESIMS: *m/z* 236.1072 calcd for C<sub>16</sub>H<sub>13</sub>NO+H<sup>+</sup> (236.1070).

#### S2.5. 5-Phenyl-3-(o-tolyl)isoxazole (4e):<sup>4</sup>

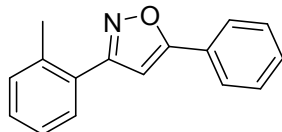

White liquid; yield: 87%; <sup>1</sup>H NMR (400 MHz, CDCl<sub>3</sub>, ppm): δ 7.83 (d, *J* = 8.0 Hz, 1H), 7.66-7.68 (m, 2H), 7.39-7.46 (m, 4H), 7.30 (t, *J* = 8.0 Hz, 2H), 6.06 (s, 1H), 2.58 (s, 3H); <sup>13</sup>C NMR (CDCl<sub>3</sub>, 100 MHz): δ 158.8, 138.9, 134.4, 131.5, 131.5, 130.1, 128.9, 128.3, 126.4, 126.0, 121.0, 113.0, 22.2; IR (CHCl<sub>3</sub>): ν<sub>max</sub> 3433, 2925, 1631, 1450, 1353, 1095, 1017 cm<sup>-1</sup>; ESI-MS: *m/z* 236.10 [M+H]<sup>+</sup>; HR-ESIMS: *m/z* 236.1072 calcd for C<sub>16</sub>H<sub>13</sub>NO+H<sup>+</sup> (236.1070).

#### S2.6. 4-(5-(4-(tert-butyl) phenyl) isoxazol-3-yl) phenol (4f)

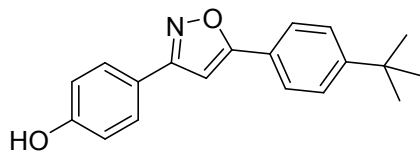

White solid; yield 70%; m. p. 167-170 °C ; <sup>1</sup>H NMR (400 MHz, CDCl<sub>3</sub>, ppm): δ 7.74-7.77 (m, 4H), 7.50 (d, *J* = 12.0 Hz, 2H), 6.95 (d, *J* = 8.0 Hz, 2H), 6.73(s, 1H), 1.27(s, 9H); <sup>13</sup>C NMR (CDCl<sub>3</sub>, 125 MHz): δ 170.3, 162.6, 157.4, 153.6, 128.4, 125.9, 125.6, 124.7, 121.5, 115.9, 96.8, 34.4, 31.20 IR (CHCl<sub>3</sub>): ν<sub>max</sub> 3351, 2963, 2868, 1614, 1435, 1269, 840 cm<sup>-1</sup>; ESI-MS: *m/z* 294.14 [M+H]<sup>+</sup>; HR-ESIMS: *m/z* 294.1487 calcd for C<sub>19</sub>H<sub>19</sub>NO<sub>2</sub>+H<sup>+</sup> (294.1489).

**S2.7. 4-(5-(4-Ethylphenyl) isoxazole-3-yl) phenol (4g)**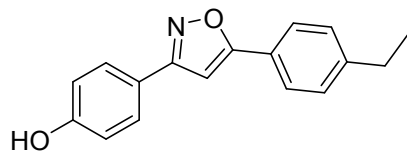

White solid; yield: 70%; m. p. 172-174 °C; <sup>1</sup>H NMR (400 MHz, CDCl<sub>3</sub>, ppm): δ 7.77-7.78 (m, 4H), 7.32 (d, *J* = 8.0 Hz, 2H), 6.94 (d, *J* = 8.0 Hz, 2H), 6.73 (s, 1H), 2.71 (q, *J* = 8.0 Hz, 2H), 1.28 (t, *J* = 8.0 Hz, 3H); <sup>13</sup>C NMR (CDCl<sub>3</sub>, 100 MHz): δ 170.4, 162.6, 157.4, 146.8, 128.5, 128.4, 125.9, 124.9, 121.6, 115.9, 96.8, 28.8, 15.30; IR (CHCl<sub>3</sub>): ν<sub>max</sub> 3343, 2962, 2924, 1613, 1439, 1018, 838 cm<sup>-1</sup>; ESI-MS: *m/z* 266.11 [M+H]<sup>+</sup>; HR-ESIMS: *m/z* 266.1183 calcd for C<sub>17</sub>H<sub>15</sub>NO<sub>2</sub>+H<sup>+</sup> (266.1176).

**S2.8. 1-((3-(p-Tolyl) isoxazol-5-yl) methyl) indoline-2, 3-dione (4h)**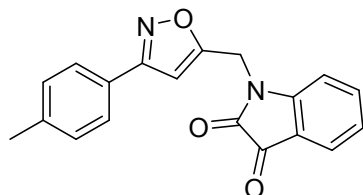

Orange solid; yield: 50%; m. p. 167-169 °C; <sup>1</sup>H NMR (400 MHz, CDCl<sub>3</sub>, ppm): δ 7.62-7.66 (m, 4H), 7.24 (d, *J* = 8.0 Hz, 2H), 7.17 (t, *J* = 8.0 Hz, 1H), 7.09 (d, *J* = 8.0 Hz, 1H), 6.58 (s, 1H), 5.07 (s, 2H), 2.39 (s, 3H); <sup>13</sup>C NMR (CDCl<sub>3</sub>, 100 MHz): δ 182.2, 165.7, 162.9, 157.7, 149.7, 140.6, 138.7, 129.7, 126.7, 125.7, 125.4, 124.4, 117.7, 110.7, 101.6, 35.5, 21.4 IR (CHCl<sub>3</sub>): ν<sub>max</sub> 3436, 2921, 1736, 1611, 1470, 1020 cm<sup>-1</sup>; ESI-MS: *m/z* 319.11 [M+H]<sup>+</sup>.

**S2.9. 3-(3-(p-Tolyl)isoxazole-5-yl)phenol (4i)**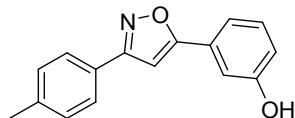

White solid; yield: 80%; m. p. 215-218 °C ; <sup>1</sup>H NMR (400 MHz, CD<sub>3</sub>OD, ppm): δ 7.67 (d, *J* = 8.0 Hz, 2H), 7.21-7.25 (m, 5H), 7.01 (s, 1H), 6.81 (m, 1H), 2.31 (s, 3H); <sup>13</sup>C NMR (CDCl<sub>3</sub>+CD<sub>3</sub>OD, 100 MHz): δ 169.7, 162.3, 156.7, 139.6, 129.4, 128.9, 127.6, 125.9, 125.1, 116.8, 116.5, 111.7, 96.9, 20.5; IR (CHCl<sub>3</sub>): ν<sub>max</sub> 3439, 3294, 2923, 2853, 1565, 1420, 1185, 686

cm<sup>-1</sup>; ESI-MS: *m/z* 252.09 [M+H]<sup>+</sup>; HR-ESIMS: *m/z* 252.1017 calcd for C<sub>16</sub>H<sub>13</sub>NO<sub>2</sub>+H<sup>+</sup> (252.1019).

**S2.10. 4-(5-(Hydroxymethyl) isoxazole-3-yl) phenol (4j):<sup>5</sup>**

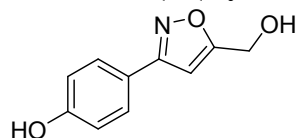

White solid; yield: 65%; m. p. 137-139 °C; <sup>1</sup>H NMR (400 MHz, CD<sub>3</sub>OD, ppm): δ 7.56 (d, *J* = 8.0 Hz, 2H), 6.77 (d, *J* = 8.0 Hz, 2H), 6.50 (s, 1H), 4.59 (s, 2H); <sup>13</sup>C NMR (CDCl<sub>3</sub>+CD<sub>3</sub>OD, 100 MHz): δ 179.2, 172.3, 162.2, 128.2, 120.0, 115.7, 99.5, 55.8; IR (CHCl<sub>3</sub>): ν<sub>max</sub> 3435, 2922, 2851, 1705, 1612, 1427, 1019 cm<sup>-1</sup>; ESI-MS: *m/z* 192.06 [M+H]<sup>+</sup>; HR-ESIMS: *m/z* 192.0656 calcd for C<sub>10</sub>H<sub>9</sub>NO<sub>3</sub>+H<sup>+</sup> (192.0655).

**S2.11. 3-(1H-Indol-3-yl)-5-phenylisoxazole (4k)**

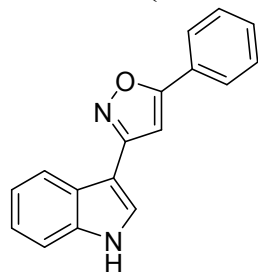

White solid; yield: 60%; m. p. 194-197 °C ; <sup>1</sup>H NMR (400 MHz, CD<sub>3</sub>OD, ppm): δ 8.02-8.04 (m, 1H), 7.77-7.83 (m, 4H), 7.35-7.46 (m, 4H), 7.06-7.15(m, 3H); <sup>13</sup>C NMR (CDCl<sub>3</sub>+CD<sub>3</sub>OD, 100 MHz): δ 169.0, 159.1, 136.5, 130.0, 128.9, 127.9, 125.9, 125.0, 124.9, 122.7, 121.0, 120.9, 111.5, 106.5, 97.7; IR (CHCl<sub>3</sub>): ν<sub>max</sub> 3301, 2922, 1595, 1580, 1441, 1106, 1019, 740 cm<sup>-1</sup>; ESI-MS: *m/z* 261.09 [M+H]<sup>+</sup>; HR-ESIMS: *m/z* 261.1033 calcd for C<sub>17</sub>H<sub>12</sub>N<sub>2</sub>O+H<sup>+</sup> (261.1022).

**S2.12. 5-Phenyl-3-(pyridine-2-yl)isoxazole (4l):<sup>6</sup>**

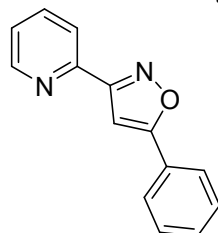

White solid; yield: 78%; m. p. 79-81 °C ; <sup>1</sup>H NMR (400 MHz, CDCl<sub>3</sub>, ppm): δ 8.72 (d, *J* = 8Hz, 1H), 8.14 (d, *J* = 8Hz, 1H), 7.80-7.88 (m, 3H), 7.46-7.52 (m, 3H), 7.38 (dd, *J* = 4, 8Hz, 1H), 7.21



(s, 1H);  $^{13}\text{C}$  NMR ( $\text{CDCl}_3$ , 100 MHz):  $\delta$  170.6, 163.7, 149.7, 148.5, 136.9, 130.2, 129.0, 127.4, 125.8, 124.5, 121.6, 98.3; IR ( $\text{CHCl}_3$ ):  $\nu_{\text{max}}$  3436, 2925, 1593, 1567, 1486, 1460, 1401, 764  $\text{cm}^{-1}$ ; ESI-MS:  $m/z$  223.08  $[\text{M}+\text{H}]^+$ .

### S2.13. 3, 5-Diphenyl-4, 5-dihydroisoxazole (6a):<sup>3</sup>

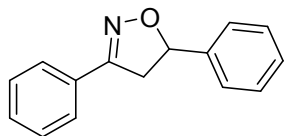

White solid; yield: 85%; m. p. 72-74 °C;  $^1\text{H}$  NMR (400 MHz,  $\text{CDCl}_3$ , ppm):  $\delta$  7.70 (dd,  $J = 4.0$ , 8.0 Hz, 2H), 7.30- 7.42 (m, 8H), 5.75 (dd,  $J = 11.0$ , 8.3 Hz, 1H), 3.79(dd,  $J = 16.6$ , 11.0 Hz, 1H), 3.35 (dd,  $J = 16.6$ , 8.3 Hz, 1H);  $^{13}\text{C}$  NMR ( $\text{CDCl}_3$ , 100 MHz):  $\delta$  156.1, 140.9, 130.2, 129.4, 128.8, 128.2, 126.7, 125.9, 82.6, 43.2; IR ( $\text{CHCl}_3$ ):  $\nu_{\text{max}}$  3433, 2920, 1730, 1446, 1352, 1120, 893, 751, 686  $\text{cm}^{-1}$ ; ESI-MS:  $m/z$  224.10  $[\text{M}+\text{H}]^+$ ; HR-ESIMS:  $m/z$  224.1084 calcd for  $\text{C}_{15}\text{H}_{13}\text{NO}+\text{H}^+$  (224.1070).

### S2.14. 4-(5-(4-Fluorophenyl)-4, 5-dihydroisoxazol-3-yl)phenol (6b)

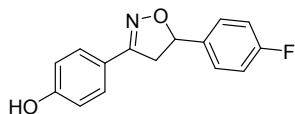

White solid; yield: 70%; m. p. 124 – 126 °C ;  $^1\text{H}$  NMR (400 MHz,  $\text{CDCl}_3$ , ppm):  $\delta$  7.54 (d,  $J = 8.0$  Hz, 2H), 7.36 (dd,  $J = 4$ , 8.0 Hz, 2H), 7.06 (t,  $J = 8.0$  Hz, 2H), 6.86 (d,  $J = 8.0$  Hz, 2H), 5.67(dd,  $J = 10.4$ , 8.6 Hz, 1H), 3.75 (dd,  $J = 16.6$ , 10.8 Hz, 1H), 3.28 (dd,  $J = 16.6$ , 8.2 Hz, 1H);  $^{13}\text{C}$  NMR ( $\text{CDCl}_3+\text{CD}_3\text{OD}$ , 125 MHz):  $\delta$  162.5 (d,  $^1J_{\text{CF}} = 245$  Hz), 159.0, 156.4, 136.6, 136.5, 128.4, 127.7, 127.6, 120.3, 115.6 (d,  $^2J_{\text{CF}} = 21.2$  Hz), 115.5, 81.5, 43.4; IR ( $\text{CHCl}_3$ ):  $\nu_{\text{max}}$  3405, 2921, 2852, 1538, 1493, 1272, 1017  $\text{cm}^{-1}$ ; ESI-MS:  $m/z$  258.11  $[\text{M}+\text{H}]^+$ ; HR-ESIMS:  $m/z$  258.0955 calcd for  $\text{C}_{15}\text{H}_{12}\text{FNO}_2+\text{H}^+$  (258.0925).

### S2.15. 3-(2-Ethoxyphenyl)-5-(4-fluorophenyl)-4,5-dihydroisoxazole (6c)

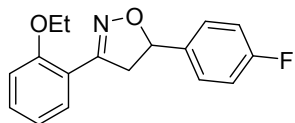

Colorless liquid; yield: 71%;  $^1\text{H}$  NMR (400 MHz,  $\text{CDCl}_3$ , ppm):  $\delta$  7.79 (d,  $J = 8.0$  Hz, 1H), 7.34- 7.40 (m, 3H), 7.06 (t,  $J = 8.0$  Hz, 2H), 6.98 (t,  $J = 8.0$  Hz, 1H), 6.91(d,  $J = 8.0$  Hz, 1H), 5.66 (t,  $J = 9.3$  Hz, 1H), 4.06 (q,  $J = 6.9$  Hz, 2H), 3.90 (dd,  $J = 17.4, 10.8$  Hz, 1H), 3.48 (dd,  $J = 17.4, 8.1$  Hz, 1H), 1.39 (t,  $J = 6.9$  Hz, 3H);  $^{13}\text{C}$  NMR ( $\text{CDCl}_3$ , 125 MHz):  $\delta$  162.5 (d,  $^1J_{\text{CF}} = 245$  Hz), 156.9, 156.0, 137.1, 131.4, 129.4, 127.8, 127.7, 120.7, 118.6, 115.5 (d,  $^2J_{\text{CF}} = 21.2$  Hz), 112.1, 81.9, 63.9, 45.8, 14.7; IR ( $\text{CHCl}_3$ ):  $\nu_{\text{max}}$  3440, 2979, 2925, 1600, 1510, 1497, 1452, 1245, 1123, 1040  $\text{cm}^{-1}$ ; ESI-MS:  $m/z$  286.12  $[\text{M}+\text{H}]^+$ ; HR-ESIMS:  $m/z$  286.1260 calcd for  $\text{C}_{17}\text{H}_{16}\text{FNO}_2+\text{H}^+$  (286.1238).

### S2.16. 4-(5-phenyl-4, 5-dihydroisoxazole-3-yl) phenol (6d):<sup>7</sup>

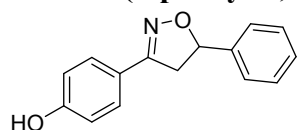

White solid; yield: 72%; m. p. 140-142  $^{\circ}\text{C}$ ;  $^1\text{H}$  NMR (400 MHz,  $\text{CDCl}_3$ , ppm):  $\delta$  7.59 (d,  $J = 8.0$  Hz, 2H), 7.31- 7.41 (m, 5H), 6.86 (d,  $J = 8.0$  Hz, 2H), 5.71 (dd,  $J = 10.9, 8.3$  Hz, 1H), 3.75 (dd,  $J = 16.5, 10.9$  Hz, 1H), 3.31 (dd,  $J = 16.6, 8.2$  Hz, 1H);  $^{13}\text{C}$  NMR ( $\text{CDCl}_3$ , 100 MHz):  $\delta$  156.9, 155.1, 139.7, 127.7, 127.5, 127.2, 124.8, 114.8, 81.2, 42.4; IR ( $\text{CHCl}_3$ ):  $\nu_{\text{max}}$  3355, 2924, 2854, 1610, 1455, 1354, 1019, 836  $\text{cm}^{-1}$ ; ESI-MS:  $m/z$  240.11  $[\text{M}+\text{H}]^+$ .

### S2.17. 3-(4-Methoxyphenyl)-5-phenyl-4, 5-dihydroisoxazole (6e):<sup>2</sup>

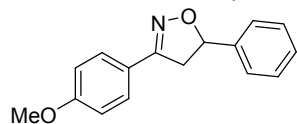

White solid; yield: 70%; m. p. 95- 97  $^{\circ}\text{C}$ ;  $^1\text{H}$  NMR (400 MHz,  $\text{CDCl}_3$ , ppm):  $\delta$  7.63 (d,  $J = 12.0$  Hz, 2H), 7.33- 7.39 (m, 5H), 6.92 (d,  $J = 12.0$  Hz, 2H), 5.71 (dd,  $J = 10.9, 8.3$  Hz, 1H), 3.84 (s, 3H), 3.76(dd,  $J = 16.5, 10.9$  Hz, 1H), 3.32 (dd,  $J = 16.5, 8.2$  Hz, 1H); IR ( $\text{CHCl}_3$ ):  $\nu_{\text{max}}$  3435, 2954, 2919, 2836, 1609, 1457, 1236, 1178, 1020, 829, 695  $\text{cm}^{-1}$ ; ESI-MS:  $m/z$  254.11  $[\text{M}+\text{H}]^+$ ; HR-ESIMS:  $m/z$  254.1176 calcd for  $\text{C}_{16}\text{H}_{15}\text{NO}_2+\text{H}^+$  (254.1176).

### S2.18. 5-Phenyl-3-(p-tolyl)-4,5-dihydroisoxazole (6f):<sup>3</sup>

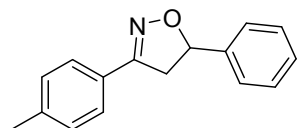

White solid; yield: 82%; m. p. 94- 96 °C ;  $^1\text{H}$  NMR (400 MHz,  $\text{CDCl}_3$ , ppm):  $\delta$  7.58 (d,  $J = 8.0$ , 2H), 7.31-7.41 (m, 5H), 7.21 (d,  $J = 8.0$ , 2H), 5.72 (dd,  $J = 10.9$ , 8.3 Hz, 1H), 3.76 (dd,  $J = 16.4$ , 8.3 Hz, 1H), 3.30 (dd,  $J = 16.6$ , 8.2 Hz, 1H), 2.38 (s, 3H);  $^{13}\text{C}$  NMR ( $\text{CDCl}_3$ , 100 MHz):  $\delta$  156.1, 141.0, 140.4, 129.4, 128.7, 128.2, 126.7, 125.9, 82.4, 43.3, 21.4; IR ( $\text{CHCl}_3$ ):  $\nu_{\text{max}}$  3439, 2923, 2853, 1456, 1430, 1238, 823  $\text{cm}^{-1}$ ; ESI-MS:  $m/z$  238.12  $[\text{M}+\text{H}]^+$ ; HR-ESIMS:  $m/z$  238.1228 calcd for  $\text{C}_{16}\text{H}_{15}\text{NO}+\text{H}^+$  (238.1226).

### S2.19. 5-phenyl-3-(*o*-tolyl)-4, 5-dihydroisoxazole (6g)

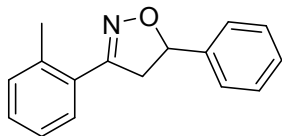

Colorless liquid; yield: 80%;  $^1\text{H}$  NMR (400 MHz,  $\text{CDCl}_3$ , ppm):  $\delta$  7.21-7.42 (m, 9H), 5.69 (dd,  $J = 10.7$ , 8.1 Hz, 1H), 3.83 (dd,  $J = 16.6$ , 10.8 Hz, 1H), 3.39 (dd,  $J = 16.6$ , 8.0 Hz, 1H), 2.60 (s, 3H);  $^{13}\text{C}$  NMR ( $\text{CDCl}_3$ , 100 MHz):  $\delta$  157.0, 141.1, 138.1, 131.6, 129.4, 128.8, 128.8, 128.5, 128.1, 125.8., 125.9, 82.4, 43.3, 21.4; IR ( $\text{CHCl}_3$ ):  $\nu_{\text{max}}$  3435, 2923, 1587, 1494, 1454, 894  $\text{cm}^{-1}$ ; ESI-MS:  $m/z$  238.12  $[\text{M}+\text{H}]^+$ ; HR-ESIMS:  $m/z$  238.1235 calcd for  $\text{C}_{16}\text{H}_{15}\text{NO}+\text{H}^+$  (238.1226).

### S2.20. 5-(3, 4-Dimethoxyphenyl)-3-phenyl-4, 5-dihydroisoxazole (6h)

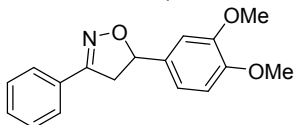

White solid; yield: 78%; m. p. 89-91 °C;  $^1\text{H}$  NMR (400 MHz,  $\text{CDCl}_3$ , ppm):  $\delta$  7.69-7.72 (m, 2H), 7.41-7.43 (m, 3H), 6.93-6.94 (m, 2H), 6.86 (d,  $J = 8\text{Hz}$ , 1H), 5.70 (dd,  $J = 10.7$ , 8.9 Hz, 1H), 3.89 (s, 6H), 3.75 (dd,  $J = 16.7$ , 10.9 Hz, 1H), 3.35 (dd,  $J = 16.7$ , 8.8 Hz, 1H);  $^{13}\text{C}$  NMR ( $\text{CDCl}_3$ , 100 MHz):  $\delta$  156.4, 149.2, 149.0, 133.1, 130.1, 129.5, 128.7, 118.5, 111.0, 108.9, 82.7, 55.9, 55.9, 43.0; IR ( $\text{CHCl}_3$ ):  $\nu_{\text{max}}$  3435, 2924, 2851, 1593, 1516, 1261, 1025,  $\text{cm}^{-1}$ ; ESI-MS:  $m/z$  284.12  $[\text{M}+\text{H}]^+$ ; HR-ESIMS:  $m/z$  284.1284 calcd for  $\text{C}_{17}\text{H}_{17}\text{NO}_3+\text{H}^+$  (284.1281).

### S2.21. 5-(3, 4-Dimethoxyphenyl)-3-(*p*-tolyl)-4, 5-dihydroisoxazole (6i)

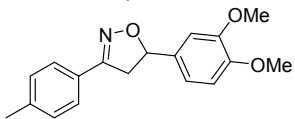

White solid; yield: 80%; m. p. 84-87 °C; <sup>1</sup>H NMR (400 MHz, CDCl<sub>3</sub>, ppm): δ 7.59 (d, *J* = 8 Hz, 2H), 7.22 (d, *J* = 8 Hz, 2H), 6.93 (d, *J* = 8 Hz, 2H), 6.85 (d, *J* = 12 Hz, 1H), 5.67 (m, 1H), 3.88 (s, 6H), 3.72 (dd, *J* = 16.6, 10.8 Hz, 1H), 3.32 (dd, *J* = 16.6, 8.8 Hz, 1H), 2.39 (s, 3H); <sup>13</sup>C NMR (CDCl<sub>3</sub>, 100 MHz): δ 156.3, 149.3, 140.3, 133.3, 129.4, 126.7, 126.6, 118.4, 111.1, 109.0, 82.5, 55.9, 55.9, 43.1, 21.4; IR (CHCl<sub>3</sub>): ν<sub>max</sub> 3439, 3294, 2924, 2836, 1517, 1454, 1261, 1138, 1026, 816 cm<sup>-1</sup>; ESI-MS: *m/z* 298.14 [M+H]<sup>+</sup>; HR-ESIMS: *m/z* 298.1440 calcd for C<sub>18</sub>H<sub>19</sub>NO<sub>3</sub>+H<sup>+</sup> (298.1438).

### S2.22. 5-(4-fluorophenyl)-3-(4-methoxyphenyl)-4,5-dihydroisoxazole (6j)

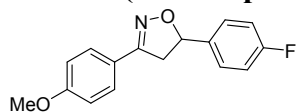

White solid; yield: 70%; m. p. 103-106 °C ; <sup>1</sup>H NMR (400 MHz, CDCl<sub>3</sub>, ppm): δ 7.61-7.64 (m, 2H), 7.35-7.38 (m, 2H), 7.02-7.08 (m, 2H), 6.91-6.94 (m, 2H), 5.68 (dd, *J* = 10.8, 8.2 Hz, 1H) 3.84 (s, 3H), 3.74 (dd, *J* = 16.6, 10.9 Hz, 1H), 3.28 (dd, *J* = 16.6, 8.2 Hz, 1H); <sup>13</sup>C NMR (CDCl<sub>3</sub>, 125 MHz): δ 162.5 (d, <sup>1</sup>*J*<sub>CF</sub> = 245 Hz), 161.1, 155.7, 136.8, 128.3, 127.7, 127.6, 121.8, 115.6 (d, <sup>2</sup>*J*<sub>CF</sub> = 23.2 Hz), 114.2, 81.6, 55.3, 43.4; IR CHCl<sub>3</sub>): ν<sub>max</sub> 3437, 2923, 2880, 1608, 1515, 1244, 1021, 831cm<sup>-1</sup>; ESI-MS: *m/z* 272.10 [M+H]<sup>+</sup>; HR-ESIMS: *m/z* 272.1079 calcd for C<sub>16</sub>H<sub>14</sub>FNO<sub>2</sub>+H<sup>+</sup> (272.1081).

### S2.23. 5-(4-Fluorophenyl)-3-phenyl-4,5-dihydroisoxazole (6k):<sup>8</sup>

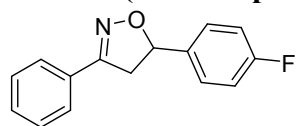

White solid; yield: 82%; m. p. 87-89 °C; <sup>1</sup>H NMR (400 MHz, CDCl<sub>3</sub>, ppm): δ 7.69 (dd, *J* = 8.0, 4.0 Hz, 2H), 7.36-7.43 (m, 5H), 7.04-7.09 (m, 2H), 5.73 (dd, *J* = 11.0, 8.2 Hz, 1H), 3.78 (dd, *J* = 16.7, 11.0 Hz, 1H), 3.31 (dd, *J* = 16.7, 8.2 Hz, 1H); <sup>13</sup>C NMR (CDCl<sub>3</sub>, 125 MHz): δ 162.5 (d, <sup>1</sup>*J*<sub>CF</sub> = 245 Hz), 156.5, 136.7, 136.7, 130.2, 128.8, 127.7, 127.6, 126.7, 115.6 (d, <sup>2</sup>*J*<sub>CF</sub> = 21.2 Hz), 81.9, 43.2; IR (CHCl<sub>3</sub>): ν<sub>max</sub> 3439, 2925, 2854, 1602, 1512, 1446, 1018, 830 cm<sup>-1</sup>; ESI-MS: *m/z* 242.09 [M+H]<sup>+</sup>; HR-ESIMS: *m/z* 242.0982 calcd for C<sub>15</sub>H<sub>12</sub>FNO+H<sup>+</sup> (242.0976).

### S2.24. 5-(4-fluorophenyl)-3-(p-tolyl)-4,5-dihydroisoxazole (6l)

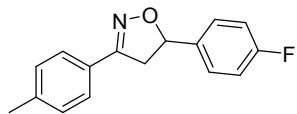

White solid; yield: 85%; m. p. 114-119 °C;  $^1\text{H}$  NMR (400 MHz,  $\text{CDCl}_3$ , ppm):  $\delta$  7.58 (d,  $J = 8.0$ , 2H), 7.35-7.38 (m, 2H), 7.22 (d,  $J = 8.0$ , 2H), 7.06-7.08 (m, 2H), 5.70 (dd,  $J = 10.8$ , 8.2 Hz, 1H), 3.76 (dd,  $J = 16.6$ , 10.9 Hz, 1H), 3.29 (dd,  $J = 16.6$ , 8.2 Hz, 1H), 2.38 (s, 3H);  $^{13}\text{C}$  NMR ( $\text{CDCl}_3$ , 125 MHz):  $\delta$  162.5 (d,  $^1J_{\text{CF}} = 245$  Hz), 156.1, 140.5, 136.8, 129.5, 127.7, 127.7, 126.7, 126.5, 115.6 (d,  $^2J_{\text{CF}} = 23.2$  Hz), 81.7, 43.3, 21.4; IR ( $\text{CHCl}_3$ ):  $\nu_{\text{max}}$  3439, 2923, 2854, 1515, 1432, 1050, 823  $\text{cm}^{-1}$ ; ESI-MS:  $m/z$  256.11  $[\text{M}+\text{H}]^+$ ; HR-ESIMS:  $m/z$  256.1134 calcd for  $\text{C}_{16}\text{H}_{14}\text{FNO}+\text{H}^+$  (256.1132).

### S2.25. 5-phenyl-3-(pyridine-2-yl)-4,5-dihydroisoxazole (6m):<sup>9</sup>

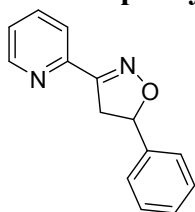

Colourless liquid; yield: 80%;  $^1\text{H}$  NMR (400 MHz,  $\text{CDCl}_3$ , ppm):  $\delta$  8.59-8.61 (m, 1H), 8.07 (d,  $J = 8.0$ , Hz, 1H), 7.72-7.76 (m, 1H), 7.28-7.42 (m, 6H), 5.80 (dd,  $J = 10.6$ , 8.0 Hz, 1H), 3.94 (dd,  $J = 16.0$ , 10.7 Hz, 1H), 3.55 (dd,  $J = 16.0$ , 8.0 Hz, 1H);  $^{13}\text{C}$  NMR ( $\text{CDCl}_3$ , 125 MHz):  $\delta$  158.1, 149.3, 140.7, 136.4, 128.7, 128.2, 125.9, 124.3, 121.8, 83.3, 42.5; IR ( $\text{CHCl}_3$ ):  $\nu_{\text{max}}$  3437, 2924, 2853, 1583, 1457, 1019, 772  $\text{cm}^{-1}$ ; ESI-MS:  $m/z$  225.09  $[\text{M}+\text{H}]^+$ .

### S2.26. 5-(4-Fluorophenyl)-3-(o-tolyl)-4,5-dihydroisoxazole (6n)

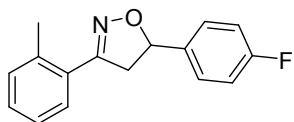

Colorless liquid; yield: 82%;  $^1\text{H}$  NMR (400 MHz,  $\text{CDCl}_3$ , ppm):  $\delta$  7.33-7.40 (m, 2H), 7.29-7.31 (m, 3H), 7.21-7.25 (m, 1H), 7.07 (t,  $J = 8.0$  Hz, 2H), 5.68 (dd,  $J = 10.7$ , 8.1 Hz, 1H), 3.82 (dd,  $J = 16.6$ , 10.8 Hz, 1H), 3.34 (dd,  $J = 16.6$ , 8.0 Hz, 1H), 2.59 (s, 3H);  $^{13}\text{C}$  NMR ( $\text{CDCl}_3$ , 100 MHz):  $\delta$  162.5 (d,  $^1J_{\text{CF}} = 245$  Hz), 157.0, 138.1, 136.8, 136.8, 131.6, 129.4, 128.8, 128.4, 127.6, 127.6, 125.8,  $\delta$  115.6 (d,  $^2J_{\text{CF}} = 22$  Hz), 80.9, 45.7, 22.9; IR ( $\text{CHCl}_3$ ):  $\nu_{\text{max}}$  3436, 2923, 1604, 1454,

1224, 1019  $\text{cm}^{-1}$ ; ESI-MS:  $m/z$  256.11  $[\text{M}+\text{H}]^+$ ; HR-ESIMS:  $m/z$  256.1132 calcd for  $\text{C}_{16}\text{H}_{14}\text{FNO}+\text{H}^+$  (256.1132).

**S2.27. 5-(3, 4-Dimethoxyphenyl)-3-(4-methoxyphenyl)isoxazole (6o)**

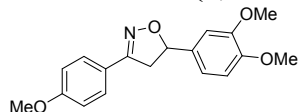

White solid; yield: 72%; m. p. 96-99  $^{\circ}\text{C}$ ;  $^1\text{H}$  NMR (400 MHz,  $\text{CDCl}_3$ , ppm):  $\delta$  7.63 (d,  $J = 12.0$  Hz, 2H), 6.84-6.94 (m, 4H), 6.83 (d,  $J = 8.0$  Hz, 1H), 5.65 (dd,  $J = 10.6, 8.9$  Hz, 1H), 3.88 (s, 6H), 3.84 (s, 3H), 3.70 (dd,  $J = 16.6, 10.8$  Hz, 1H), 3.31 (dd,  $J = 16.6, 8.8$  Hz, 1H);  $^{13}\text{C}$  NMR ( $\text{CDCl}_3$ , 125 MHz):  $\delta$  161.1, 155.9, 149.3, 149.0, 133.4, 128.2, 122.1, 118.4, 114.1, 111.1, 108.9, 82.3, 55.9, 55.9, 55.3, 43.3; IR ( $\text{CHCl}_3$ ):  $\nu_{\text{max}}$  3439, 2929, 2837, 1607, 1516, 1257, 1024, 1024  $\text{cm}^{-1}$ ; ESI-MS:  $m/z$  314.13  $[\text{M}+\text{H}]^+$ ; HR-ESIMS:  $m/z$  314.1387 calcd for  $\text{C}_{18}\text{H}_{19}\text{NO}_4+\text{H}^+$  (314.1387).

**S2.28. 5-(3, 4-Dimethoxyphenyl)-3-(o-tolyl)-4, 5-dihydroisoxazole (6p)**

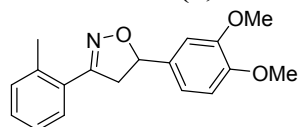

Colorless liquid; yield: 78%;  $^1\text{H}$  NMR (400 MHz,  $\text{CDCl}_3$ , ppm):  $\delta$  7.23-7.35 (m, 4H), 6.92-6.95 (m, 2H), 6.86 (d,  $J = 8\text{Hz}$ , 1H), 5.65 (dd,  $J = 10.6, 8.5$  Hz, 1H), 3.89 (s, 3H), 3.88 (s, 3H), 3.79 (dd,  $J = 16.6, 10.8$  Hz, 1H), 3.39 (dd,  $J = 16.6, 8.4$  Hz, 1H), 2.60 (s, 3H);  $^{13}\text{C}$  NMR ( $\text{CDCl}_3$ , 125 MHz):  $\delta$  157.2, 149.2, 148.9, 138.0, 133.3, 131.6, 129.4, 128.8, 128.5, 125.8, 118.3, 111.1, 108.8, 81.5, 55.9, 55.9, 45.6, 23.0; IR ( $\text{CHCl}_3$ ):  $\nu_{\text{max}}$  3348, 2923, 1516, 1261, 1138, 1025, 759  $\text{cm}^{-1}$ ; ESI-MS:  $m/z$  298.14  $[\text{M}+\text{H}]^+$ ; HR-ESIMS:  $m/z$  298.1453 calcd for  $\text{C}_{18}\text{H}_{19}\text{NO}_3+\text{H}^+$  (298.1438).

**S2.29. 3-(1H-Indol-3yl)-5-phenyl-4, 5-dihydroisoxazole (6q)**

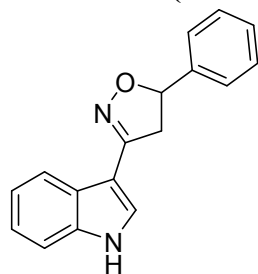

White solid; yield: 63%; m. p. 168-171 °C; <sup>1</sup>H NMR (400 MHz, CDCl<sub>3</sub>, ppm): δ 8.39 (s, 1-NH), 8.30 (d, *J* = 8.0, Hz, 1H), 7.25-7.45 (m, 9H), 5.67 (dd, *J* = 10.6, 8.0 Hz, 1H), 3.82 (dd, *J* = 16.0, 10.7 Hz, 1H), 3.38 (dd, *J* = 16.0, 8.0 Hz, 1H); <sup>13</sup>C NMR (CDCl<sub>3</sub>, 125 MHz): δ 152.4, 141.3, 136.5, 128.7, 128.0, 125.9, 125.8, 124.6, 123.6, 122.6, 121.5, 111.2, 107.7, 80.8, 44.6; IR (CHCl<sub>3</sub>): ν<sub>max</sub> 3414, 2922, 1595, 1433, 1019, 743 cm<sup>-1</sup>; ESI-MS: *m/z* 263.11 [M+H]<sup>+</sup>; HR-ESIMS: *m/z* 263.1184 calcd for C<sub>17</sub>H<sub>14</sub>N<sub>2</sub>O+H<sup>+</sup> (263.1179).

### S2.30. 2-Chloro-4-(5-phenylisoxazole-3-yl)phenol (7a)

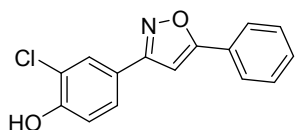

White solid; yield: 88%; m.p. 193-196 °C; <sup>1</sup>H NMR (400 MHz, CDCl<sub>3</sub>, ppm): δ 7.89 (d, *J* = 4.1, Hz, 1H), 7.82-7.84 (m, 2H), 7.68-7.71 (m, 1H), 7.47-7.50 (m, 3H), 7.13 (d, *J* = 8 Hz, 1H), 6.77(s, 1H), 5.78 (s, 1H); <sup>13</sup>C NMR (CDCl<sub>3</sub>+CD<sub>3</sub>OD, 125 MHz): δ 170.3, 161.9, 154.4, 130.3, 128.9, 128.3, 127.1, 126.3, 125.7, 121.0, 116.7, 97.2; IR (CHCl<sub>3</sub>): ν<sub>max</sub> 3346, 2922, 2851, 1594, 1422, 1019 cm<sup>-1</sup>; ESI-MS: *m/z* 272.04 [M+H]<sup>+</sup>; HR-ESIMS: *m/z* 272.0481 calcd for C<sub>15</sub>H<sub>10</sub>ClNO<sub>2</sub>+H<sup>+</sup> (272.0473).

### S2.31. 2-Chloro-4-(5-(p-tolyl)isoxazole-3-yl)phenol (7b)

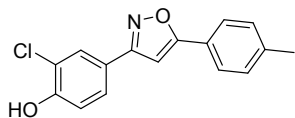

White solid; yield: 86 %; m. p. 184-186 °C; <sup>1</sup>H NMR (400 MHz, CDCl<sub>3</sub>, ppm): δ 7.88 (d, *J* = 4.1, Hz, 1H), 7.73 (s, 1H), 7.67-7.71 (m, 2H), 7.29 (d, *J* = 8.0, Hz, 2H), 7.12 (d, *J* = 8.0, Hz, 1H), 6.71(s, 1H), 5.78 (s, 1H), 2.42(s, 3H); <sup>13</sup>C NMR (CDCl<sub>3</sub>+CD<sub>3</sub>OD, 125 MHz): δ 170.5, 161.8, 154.3, 140.7, 129.6, 126.3, 125.6, 124.3, 121.3, 121.0, 116.7, 96.6, 21.32; IR (CHCl<sub>3</sub>): ν<sub>max</sub> 3128, 2922, 2851, 1602, 1425, 1300, 946, 779 cm<sup>-1</sup>; ESI-MS: *m/z* 286.06 [M+H]<sup>+</sup>; HR-ESIMS: *m/z* 286.0630 calcd for C<sub>16</sub>H<sub>12</sub>ClNO<sub>2</sub>+H<sup>+</sup> (286.0629).

### S2.32. 2-Chloro-4-(5-(4-ethylphenyl) isoxazole-3-yl) phenol (7c)

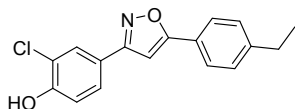

White solid; yield: 87%; m. p. 128-130 °C; <sup>1</sup>H NMR (400 MHz, CDCl<sub>3</sub>, ppm): δ 7.87 (d, *J* = 2.0 Hz, 1H), 7.74 (d, *J* = 8.2 Hz, 2H), 7.68 (dd, *J* = 8.5, 2.1 Hz, 1H), 7.31 (d, *J* = 8.2 Hz, 2H), 7.12 (d, *J* = 8.5 Hz, 1H), 6.71(s, 1H), 5.88 (s, OH), 2.71(q, *J* = 7.6 Hz, 2H), 1.28 (t, *J* = 7.6 Hz, 3H); <sup>13</sup>C NMR (CDCl<sub>3</sub>, 125 MHz): δ 170.7, 161.5, 152.9, 146.9, 128.5, 127.6, 127.0, 125.9, 124.8, 122.7, 120.6, 116.7, 96.6, 28.8, 15.3; IR (CHCl<sub>3</sub>): ν<sub>max</sub> 3136, 2925, 2851, 1613, 1430, 1301, 1220, 1058 cm<sup>-1</sup>; ESI-MS: *m/z* 300.07 [M+H]<sup>+</sup>; HR-ESIMS: *m/z* 300.0793 calcd for C<sub>17</sub>H<sub>14</sub>ClNO<sub>2</sub>+H<sup>+</sup> (300.0786).

**S2.33. 2-Chloro-4-(5-phenyl-4,5-dihydroisoxazol-3-yl)phenol (7d)**

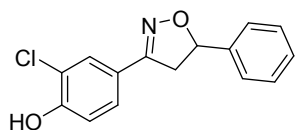

White solid; yield: 90%; m. p. 140 – 142 °C ; <sup>1</sup>H NMR (400 MHz, CDCl<sub>3</sub>, ppm): δ 7.68 (d, *J* = 1.9, Hz, 1H), 7.50(dd, *J* = 8.5, 1.9.0 Hz, 1H), 7.39-7.30 (m, 5H), 7.04 (d, *J* = 8.5 Hz, 1H), 6.22(s, OH), 5.73 (dd, *J* = 10.9, 8.3 Hz, 1H), 3.72(dd, *J* = 16.6, 11.0 Hz, 1H), 3.29 (dd, *J* = 16.6, 8.2 Hz, 1H); <sup>13</sup>C NMR (CDCl<sub>3</sub>+CD<sub>3</sub>OD, 125 MHz): δ 155.5, 154.5, 140.5, 128.7, 128.4, 128.2, 126.4, 125.7, 121.6, 120.9, 116.6, 82.4, 43.1; IR (CHCl<sub>3</sub>): ν<sub>max</sub> 3344, 2919, 1603, 1510, 1338, 1292, 1206, 1057 cm<sup>-1</sup>; ESI-MS: *m/z* 274.04 [M+H]<sup>+</sup>; HR-ESIMS: *m/z* 274.0639 calcd for C<sub>15</sub>H<sub>12</sub>ClNO<sub>2</sub>+H<sup>+</sup> (274.0629).

**S2.34. 2-Chloro-4-(5-(4-fluorophenyl)-4,5-dihydroisoxazole-3-yl)phenol (7e)**

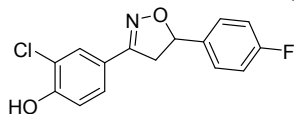

White solid; yield: 92%; m. p. 180 – 182 °C ; <sup>1</sup>H NMR (400 MHz, CDCl<sub>3</sub>, ppm): δ 7.69 (d, *J* = 1.9 Hz, 1H), 7.51 (dd, *J* = 8.5, 1.9 Hz, 1H), 7.35 (dd, *J* = 8.6, 5.3 Hz, 2H), 7.06 (t, *J* = 8.6, 3H), 5.80 (s, OH), 5.71 (dd, *J* = 10.8, 8.3 Hz, 1H), 3.72 (dd, *J* = 16.6, 10.9 Hz, 1H), 3.25 (dd, *J* = 16.6, 8.2 Hz, 1H); <sup>13</sup>C NMR (CDCl<sub>3</sub>+CD<sub>3</sub>OD, 125 MHz): δ 161.5, 155.4, 154.6, 136.3, 128.4, 127.6, 127.5, 121.5, 120.9, 116.6, 115.6, 115.4, 81.7, 43.1; IR (CHCl<sub>3</sub>): ν<sub>max</sub> 3364, 2923, 2852, 1606, 1512, 1355, 1225, 834 cm<sup>-1</sup>; ESI-MS: *m/z* 292.05 [M+H]<sup>+</sup>; HR-ESIMS: *m/z* 292.0563 calcd for C<sub>15</sub>H<sub>11</sub>ClFNO<sub>2</sub>+H<sup>+</sup> (292.0545).

**S2.35. 3-(3-Chloro-4-methoxyphenyl)-5-phenylisoxazole (7f)**



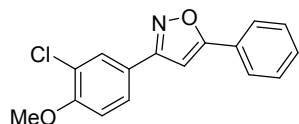

White solid; yield: 80%; m. p. 120-122 °C; <sup>1</sup>H NMR (400 MHz, CDCl<sub>3</sub>, ppm): δ 8.06 (d, *J* = 8.6 Hz, 2H), 7.86 (d, *J* = 8.6 Hz, 2H), 7.53 (m, 3H), 7.04(d, *J* = 8.6 Hz, 2H), 3.88(s, 3H); <sup>13</sup>C NMR (CDCl<sub>3</sub>, 100 MHz): δ 163.9, 161.1, 160.3, 130.5, 129.6, 128.8, 128.7, 127.4, 126.6, 126.5, 119.8, 114.2, 104.4, 55.3; IR (CHCl<sub>3</sub>): ν<sub>max</sub> 3344, 2919, 1603, 1510, 1338, 1292, 1206, 1057 cm<sup>-1</sup>; ESI-MS: *m/z* 286.06 [M+H]<sup>+</sup>, HR-ESIMS: *m/z* 286.0632 calcd for C<sub>16</sub>H<sub>12</sub>ClNO<sub>2</sub>+H<sup>+</sup> (286.0629).

**S2.36. 3-(5-Chlorofuran-2-yl)-5-phenylisoxazole (7g)**

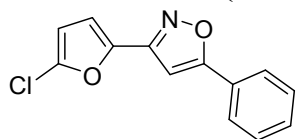

White solid; yield: 90%; m. p. 115-117 °C ; <sup>1</sup>H NMR (400 MHz, CDCl<sub>3</sub>, ppm): δ 7.82 (dd, *J* = 7.6, 1.7 Hz, 2H), 7.56-7.44 (m, 3H), 6.95 (d, *J* = 3.5 Hz, 1H), 6.77(s, 1H), 6.33(d, *J* = 3.4, Hz, 1H); <sup>13</sup>C NMR (CDCl<sub>3</sub>, 100 MHz): δ 170.4, 154.6, 143.9, 138.3, 130.4, 129.0, 125.9, 112.04, 108.5, 96.7; IR (CHCl<sub>3</sub>): ν<sub>max</sub> 3437, 3126, 2921, 1521, 1418, 1018, 759 cm<sup>-1</sup>; ESI-MS: *m/z* 246.02 [M+H]<sup>+</sup>; HR-ESIMS: *m/z* 246.0314 calcd for C<sub>13</sub>H<sub>8</sub>ClNO<sub>2</sub>+H<sup>+</sup> (246.0316).

**S2.37. 3-(5-chlorofuran-2-yl)-5-phenyl-4, 5-dihydroisoxazole (7h)**

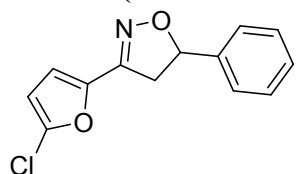

White solid; yield: 60%; m. p. 99- 101 °C; <sup>1</sup>H NMR (400 MHz, CDCl<sub>3</sub>, ppm): δ 7.30-7.40 (m, 5H), 6.72 (d, *J* = 3.5 Hz, 1H), 6.27 (d, *J* = 3.5 Hz, 1H) 5.71(dd, *J* = 10.9, 8.2 Hz, 1H), 3.71(dd, *J* = 16.7, 11.0 Hz, 1H), 3.27(dd, *J* = 16.7, 8.2 Hz, 1H), <sup>13</sup>C NMR (CDCl<sub>3</sub>, 125 MHz): δ 147.7, 144.2, 140.2, 138.9, 128.8, 128.4, 125.8, 113.7, 108.6, 82.4, 42.6; IR (CHCl<sub>3</sub>): ν<sub>max</sub> 3436, 2922, 1618, 1433, 1017cm<sup>-1</sup>; ESI-MS: *m/z* 248.04 [M+H]<sup>+</sup>; HR-ESIMS: *m/z* 248.0480 calcd for C<sub>13</sub>H<sub>10</sub>ClNO<sub>2</sub>+H<sup>+</sup> (248.0473).

### S3. Scanned copies of $^1\text{H}$ , $^{13}\text{C}$ and DEPT135 NMR spectra's of isoxazoles/ isoxazolines

#### S3.1. $^1\text{H}$ , $^{13}\text{C}$ and DEPT135 NMR spectra of 4-(5-phenylisoxazol-3-yl) phenol (**4a**)

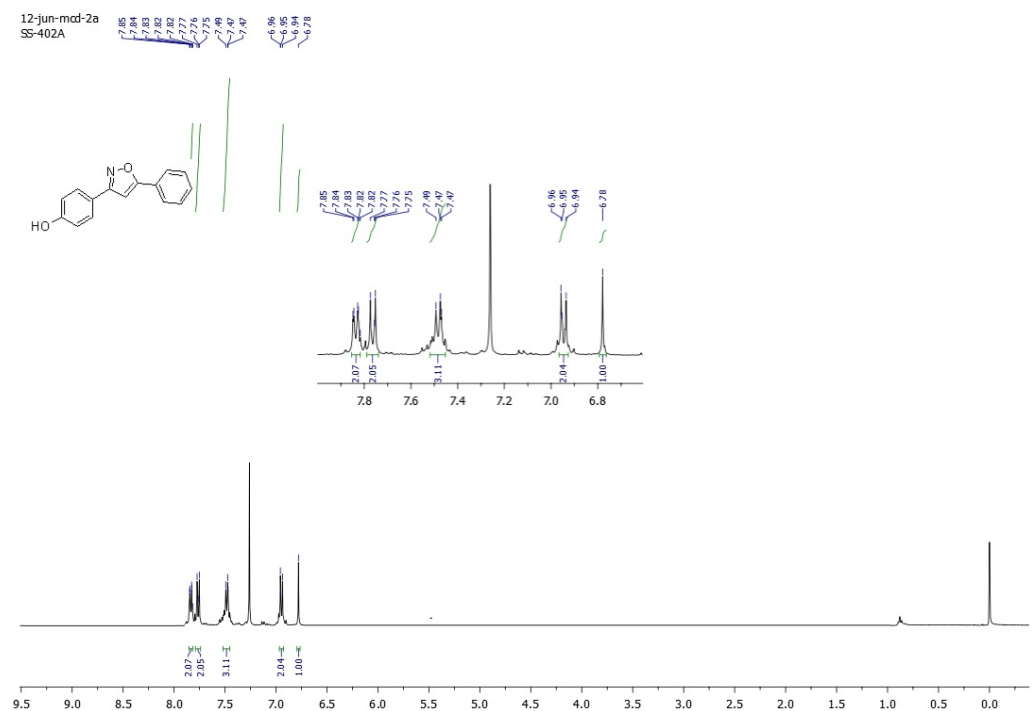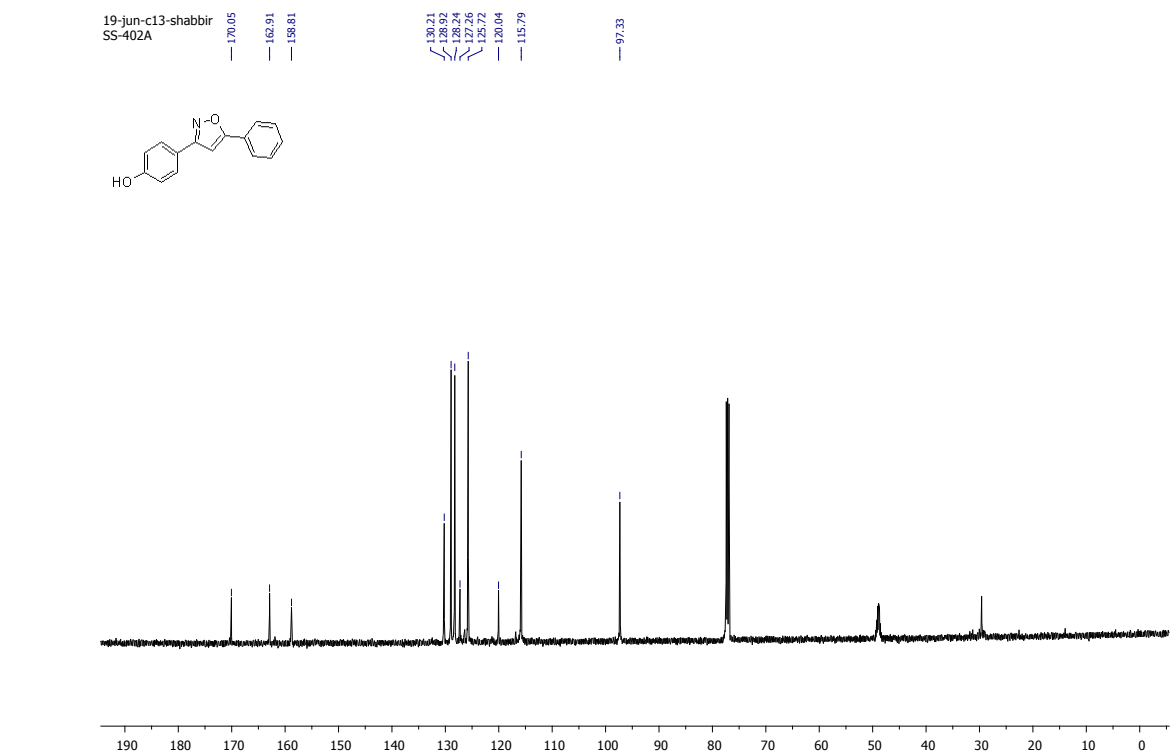

19-jun-c13-shabbir  
SS-402A

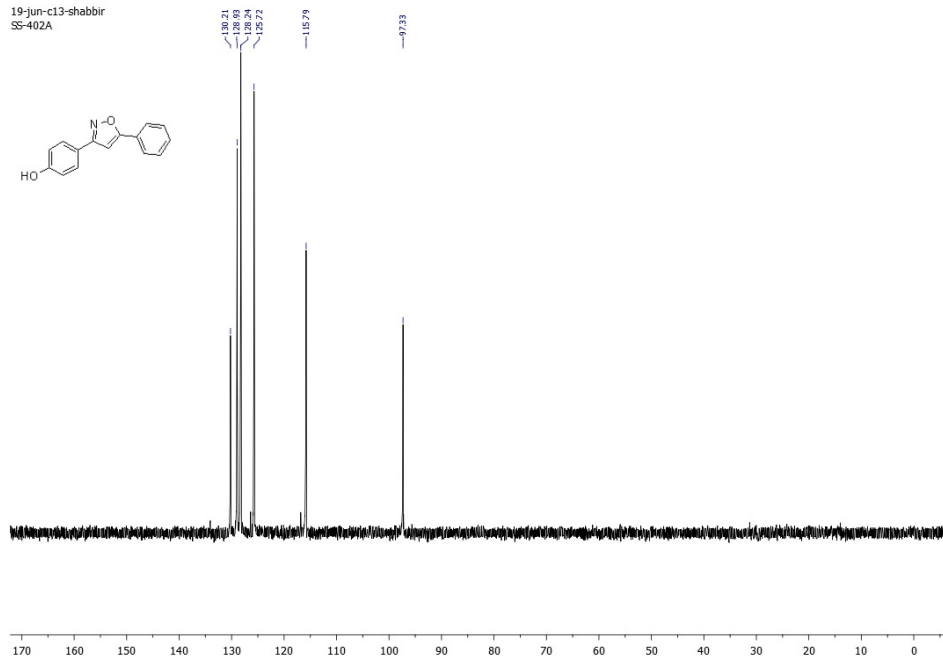

### S3.2. $^1\text{H}$ , and $^{13}\text{C}$ NMR spectra's of spectra's of 3,5-diphenylisoxazole (**4b**)

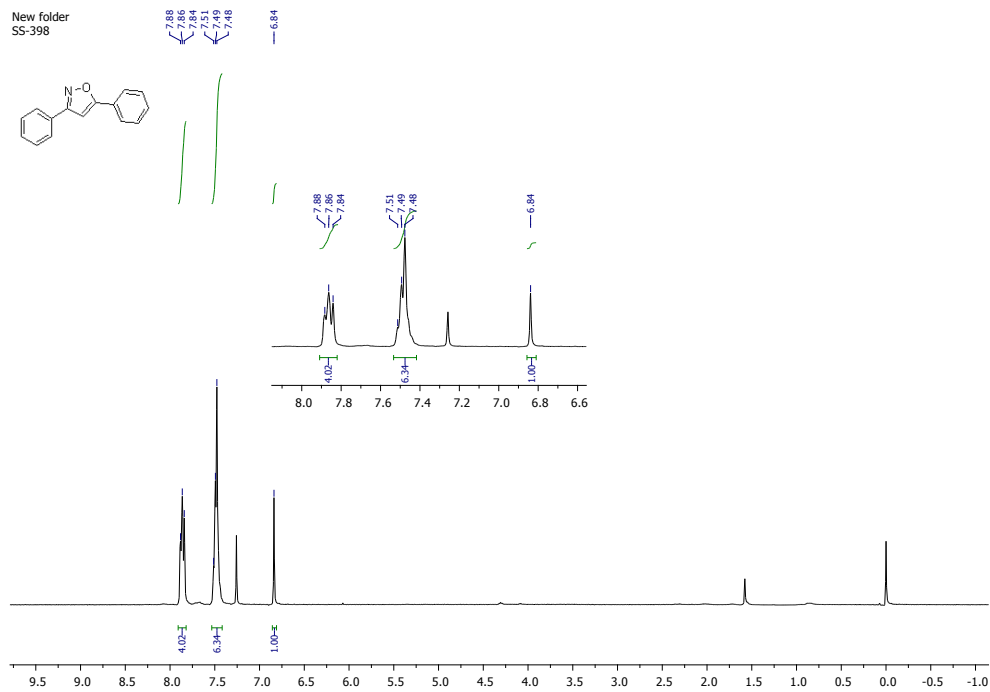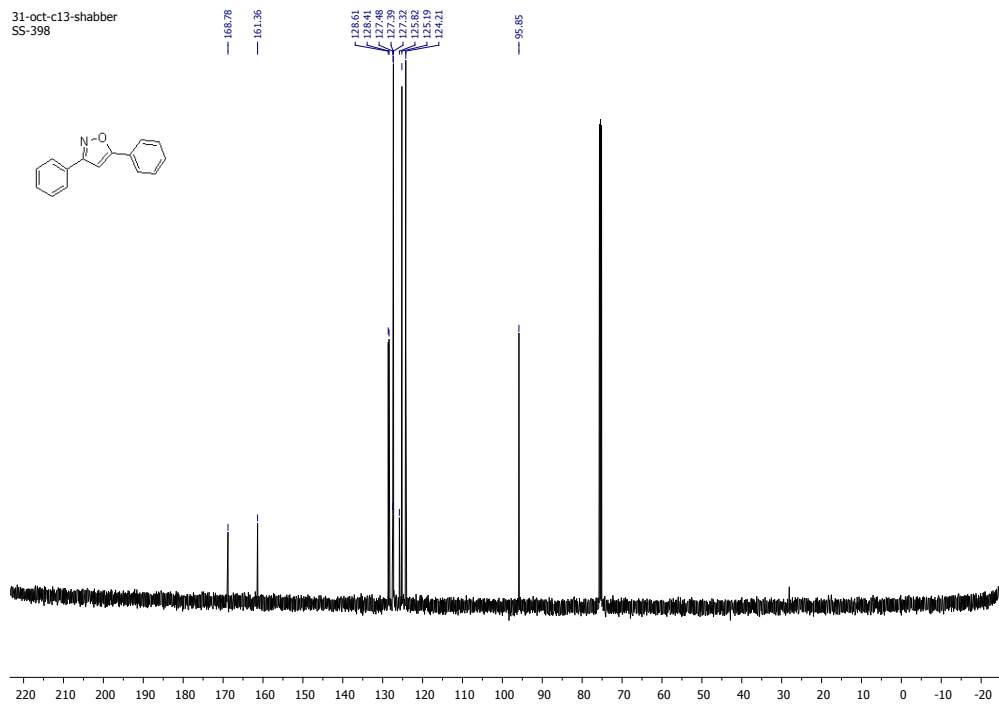

S3.3.  $^1\text{H}$ ,  $^{13}\text{C}$  and DEPT135 NMR spectra of 3-(4-methoxyphenyl)-5-phenylisoxazole (**4c**)

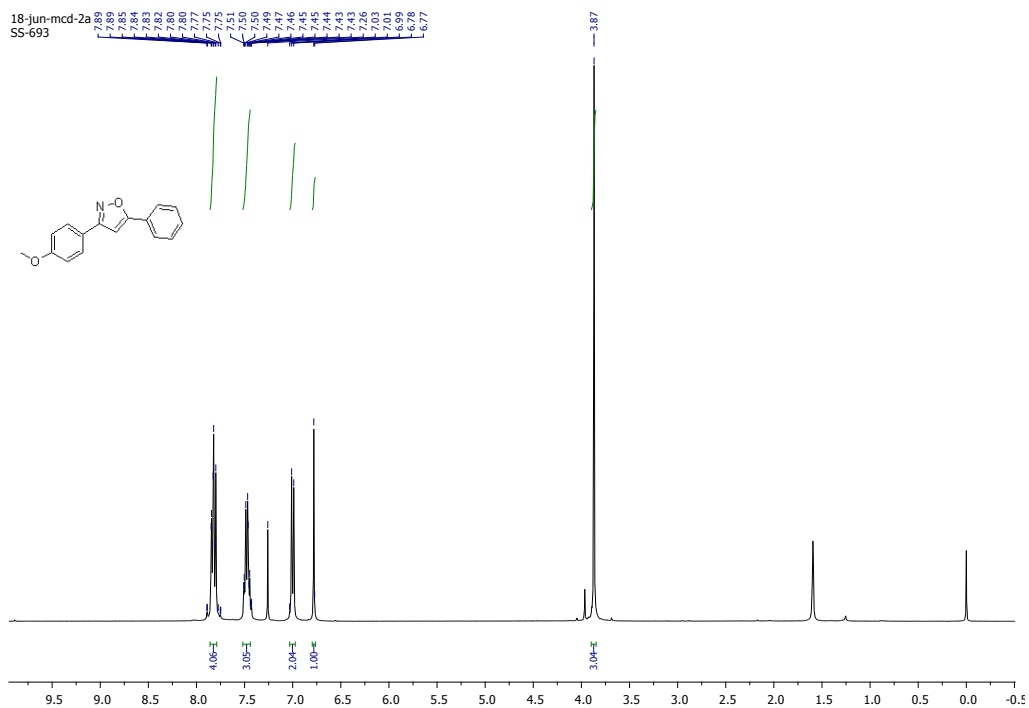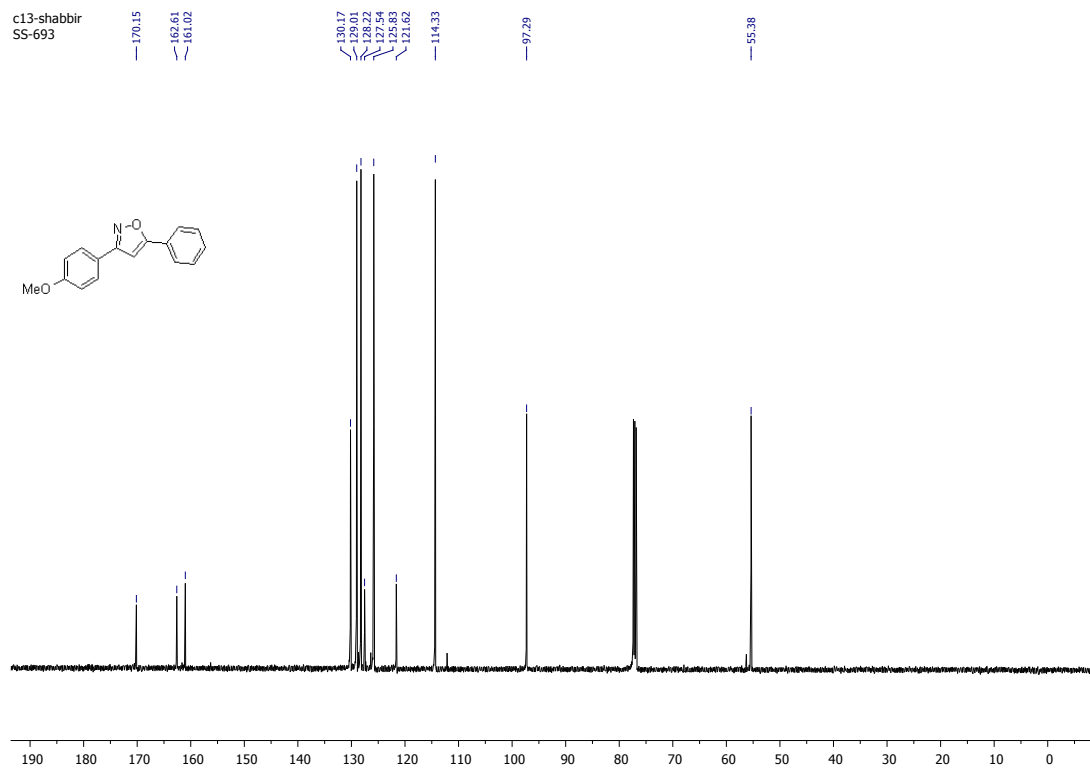

c13-shabbir  
SS-693

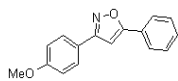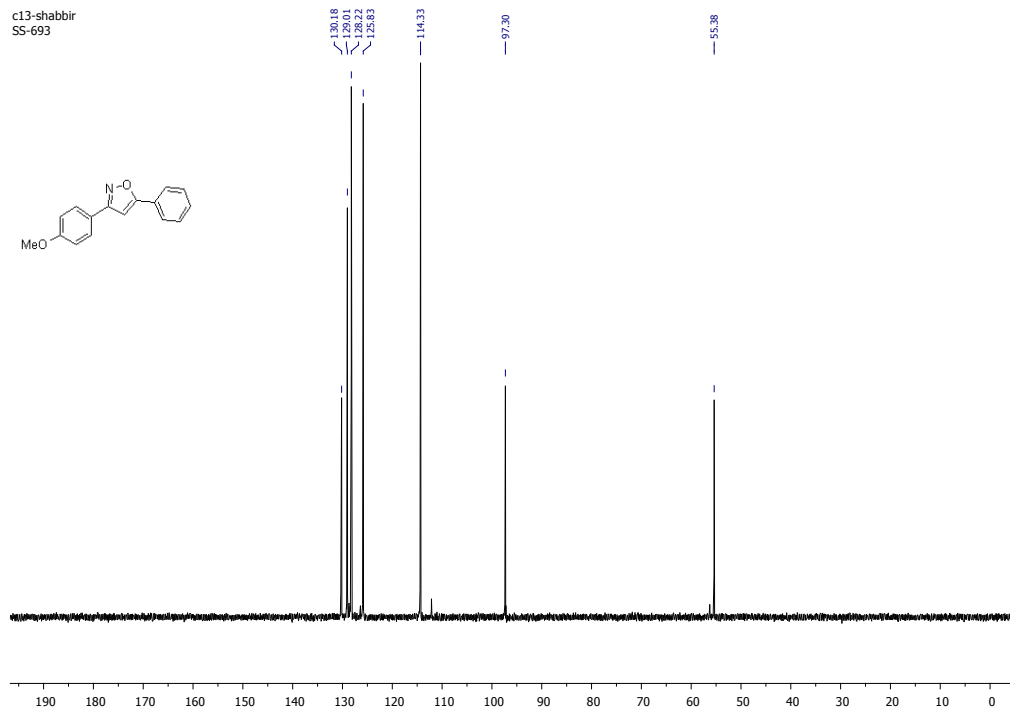

S3.4.  $^1\text{H}$ ,  $^{13}\text{C}$  and DEPT135 NMR spectra of 5-phenyl-3-(p-tolyl)isoxazole (**4d**)

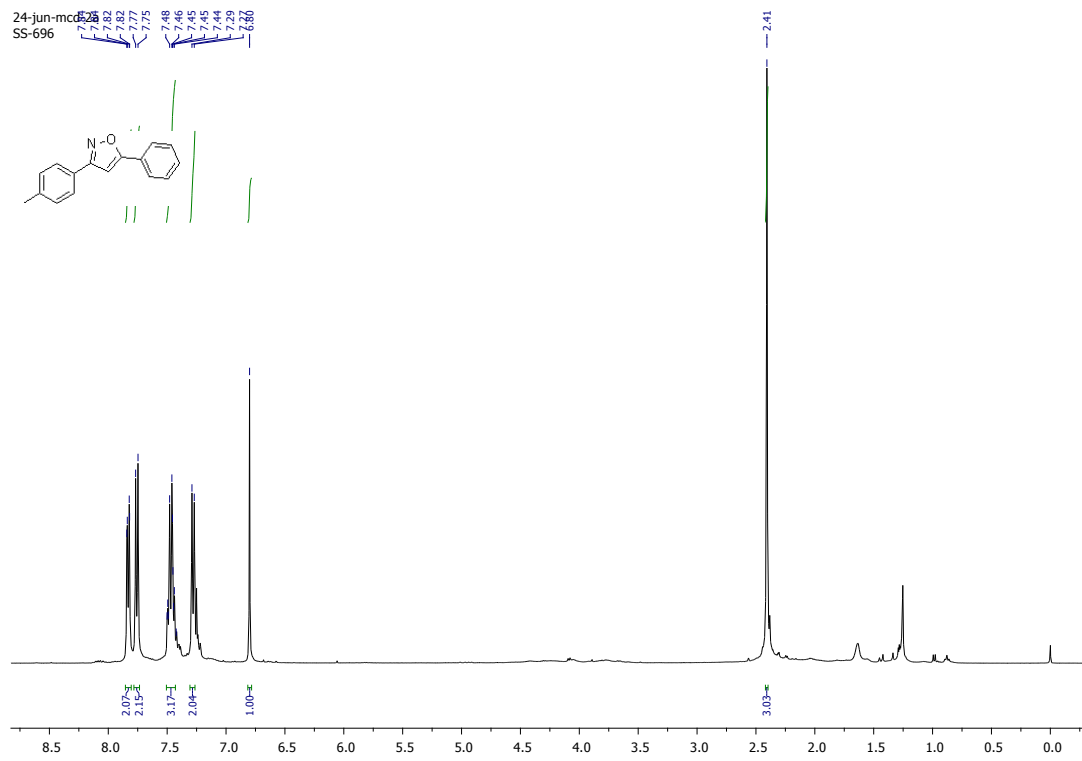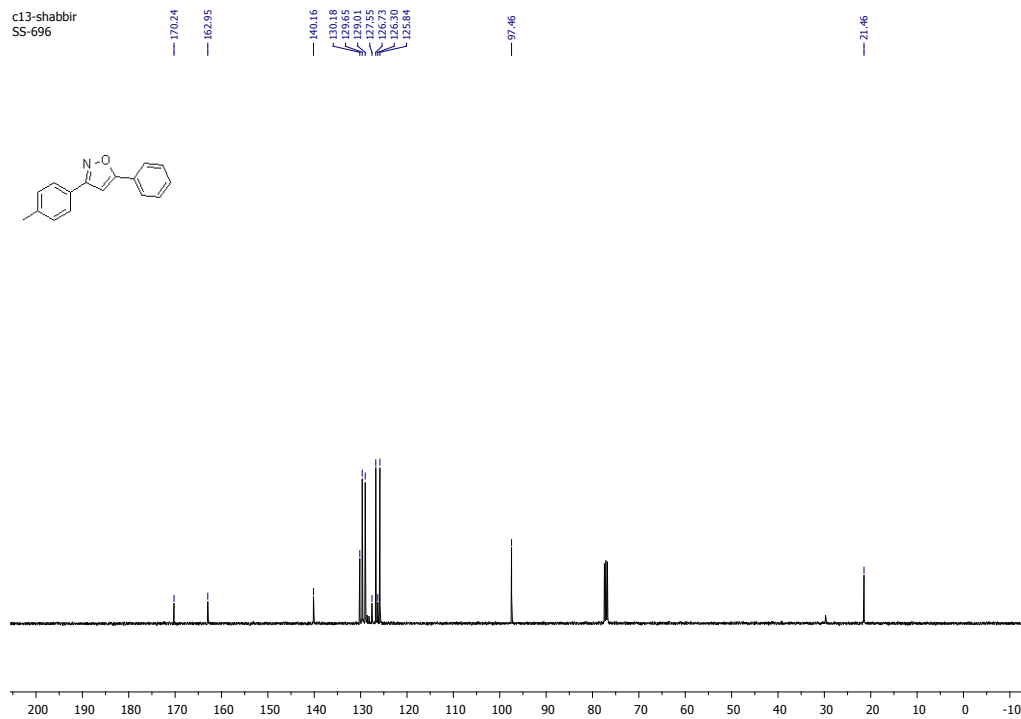

c13-shabbir  
SS-696

130.17  
129.65  
129.01  
128.84

97.46

21.45

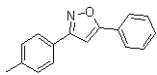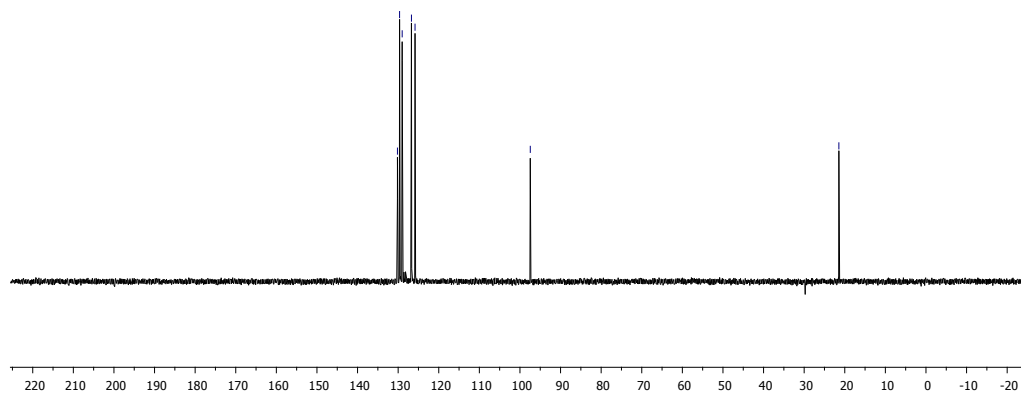



S3.5.  $^1\text{H}$ ,  $^{13}\text{C}$  and DEPT135 NMR spectra of 5-phenyl-3-(o-tolyl)isoxazole (**4e**)

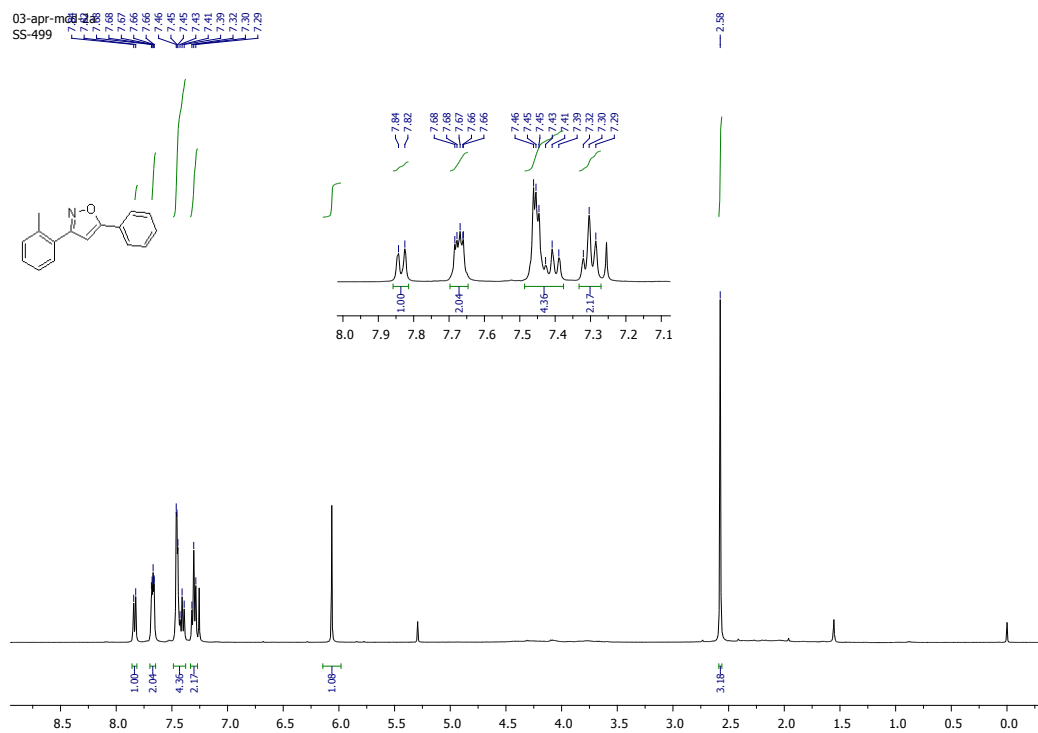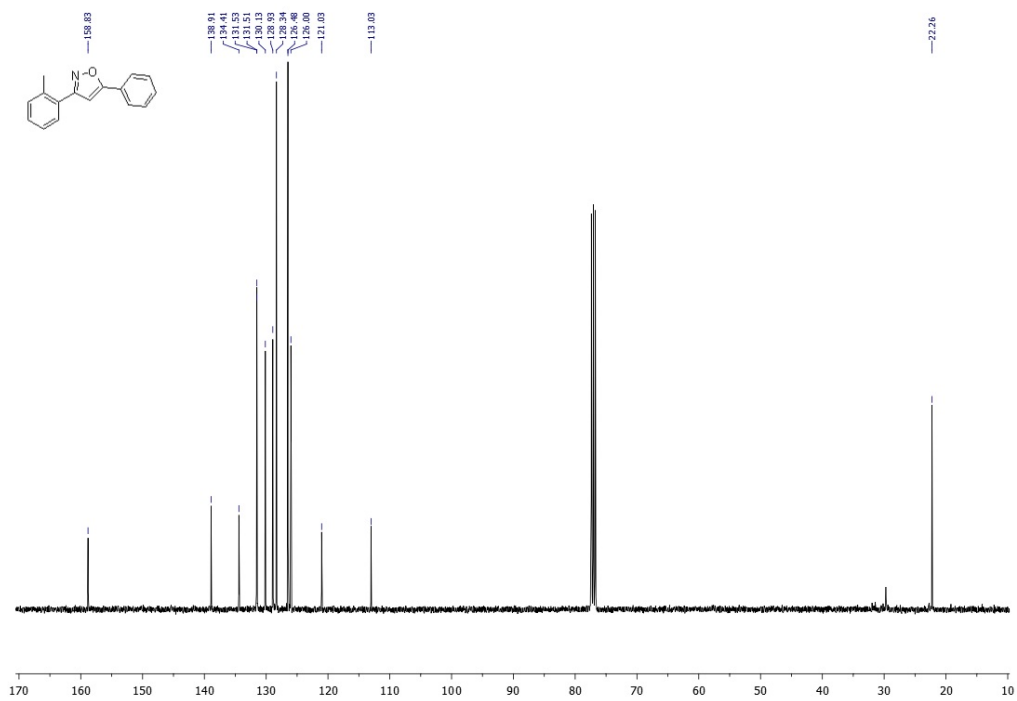

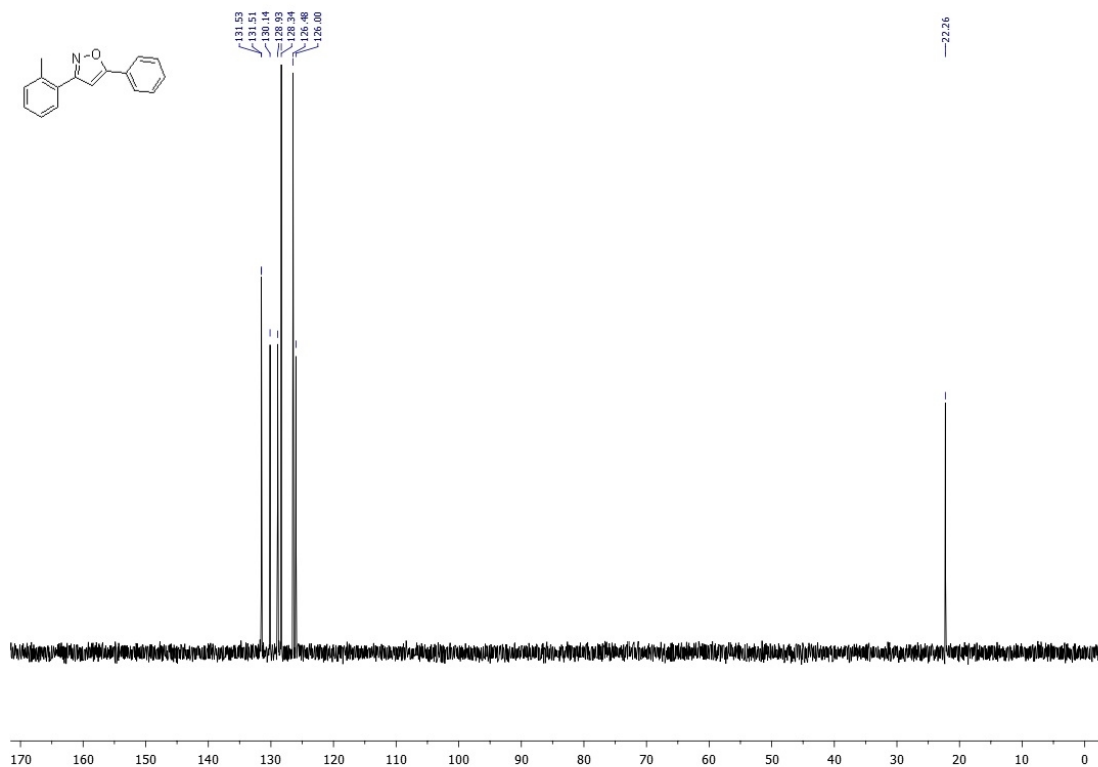

S3.6.  $^1\text{H}$ ,  $^{13}\text{C}$  and DEPT135 NMR spectra of 4-(5-(4-(tert-butyl) phenyl) isoxazol-3-yl) phenol (**4f**)

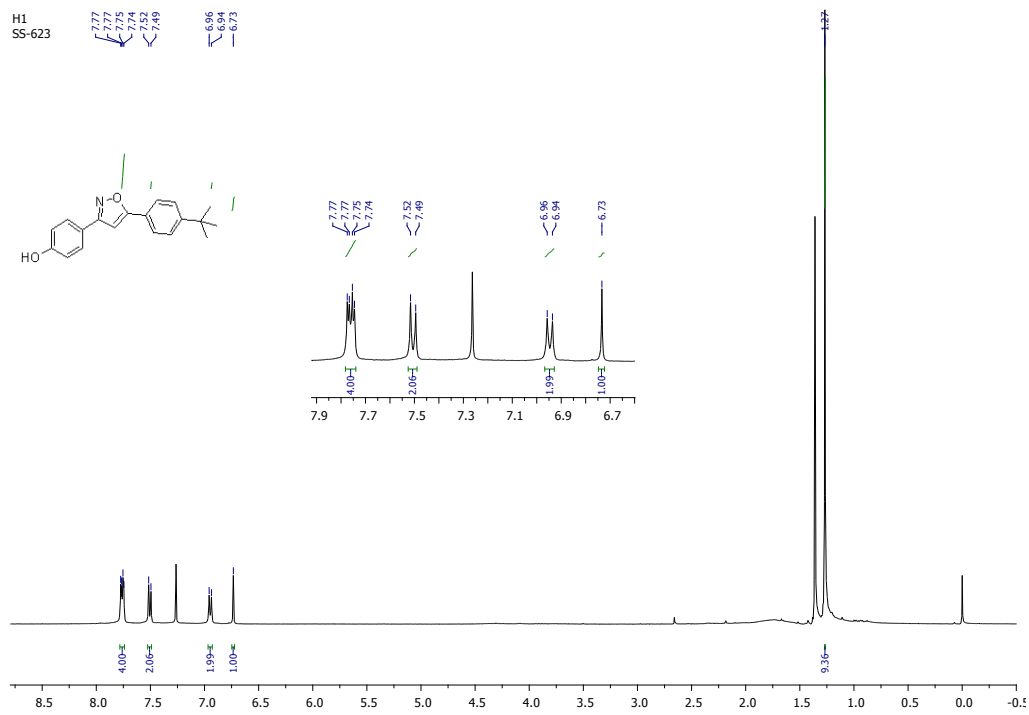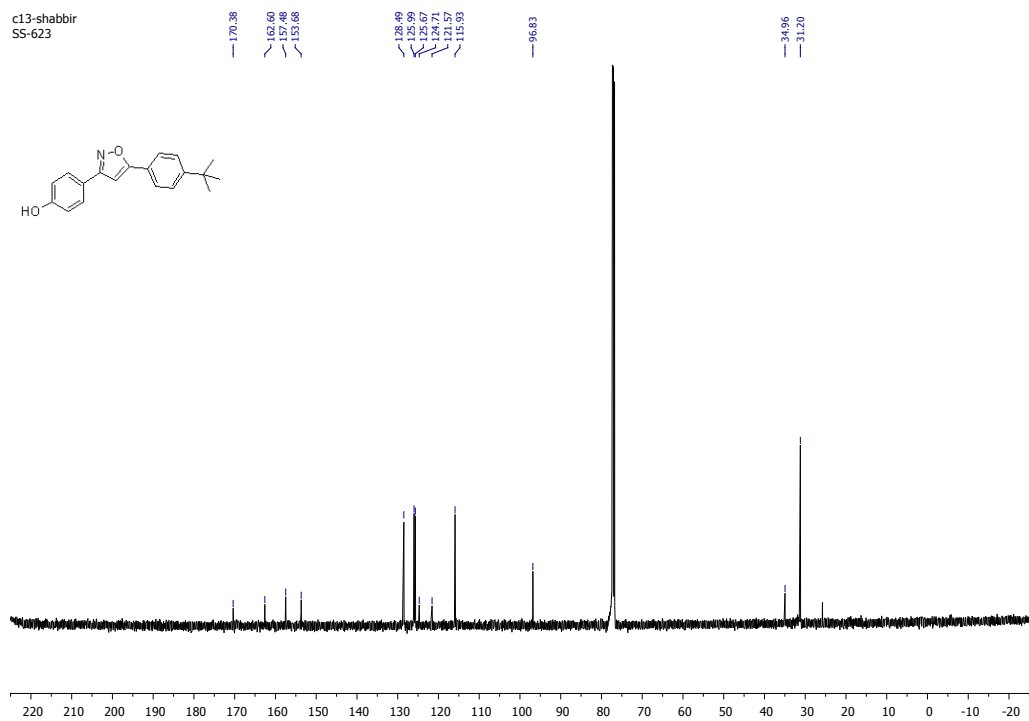

c13-shabbir  
SS-623

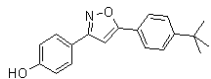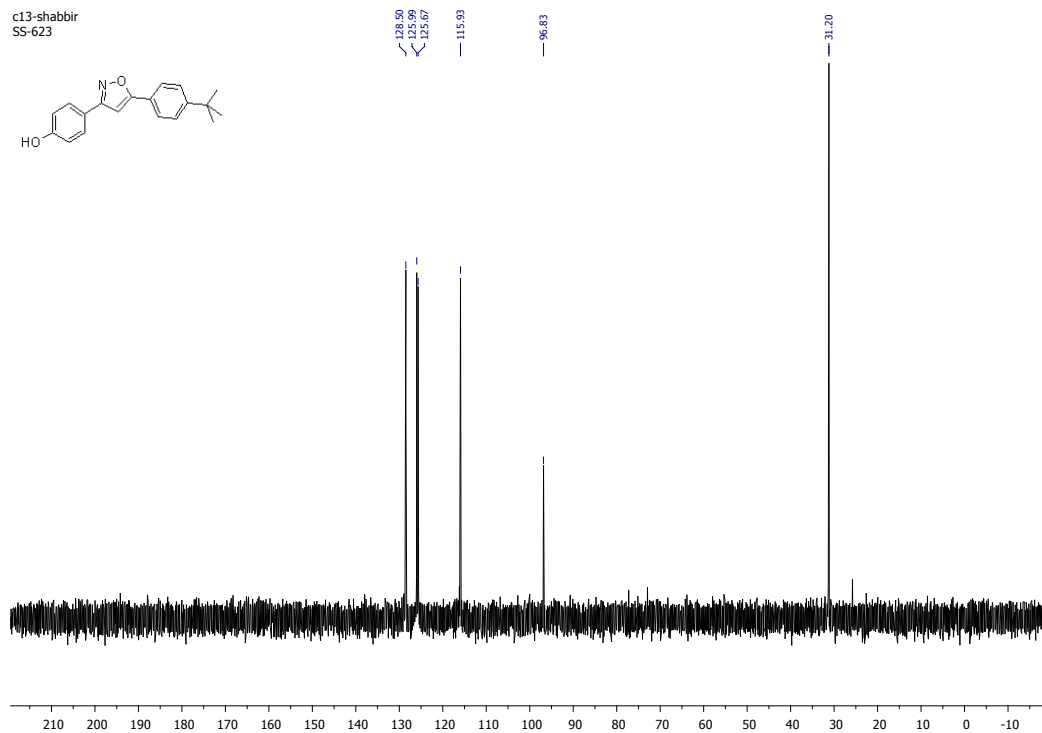

S3.7.  $^1\text{H}$ ,  $^{13}\text{C}$  and DEPT135 NMR spectra of 4-(5-(4-ethylphenyl) isoxazole-3-yl) phenol (**4g**)

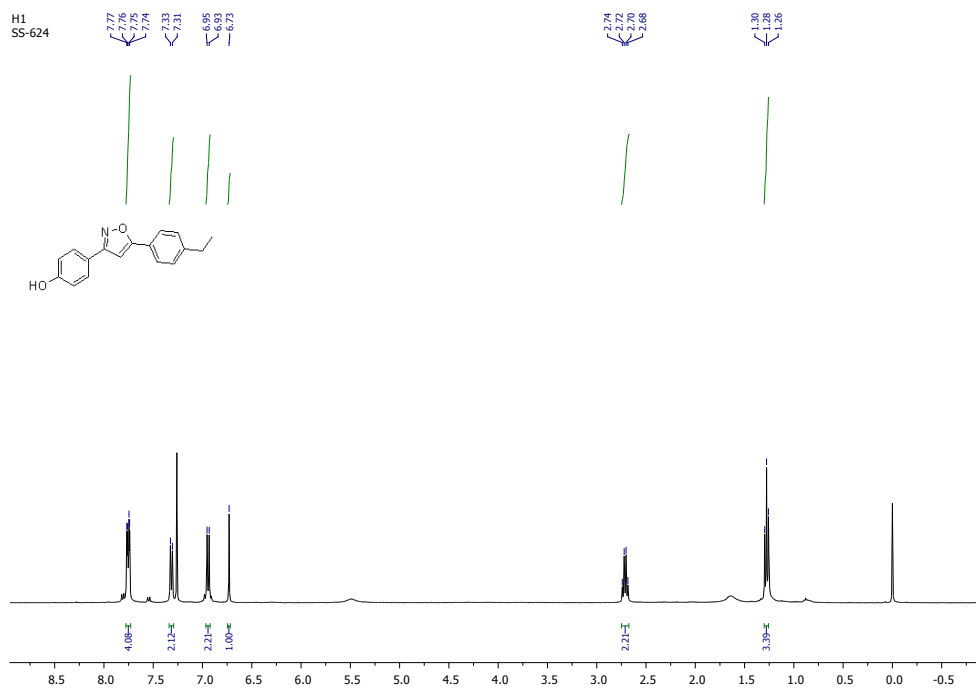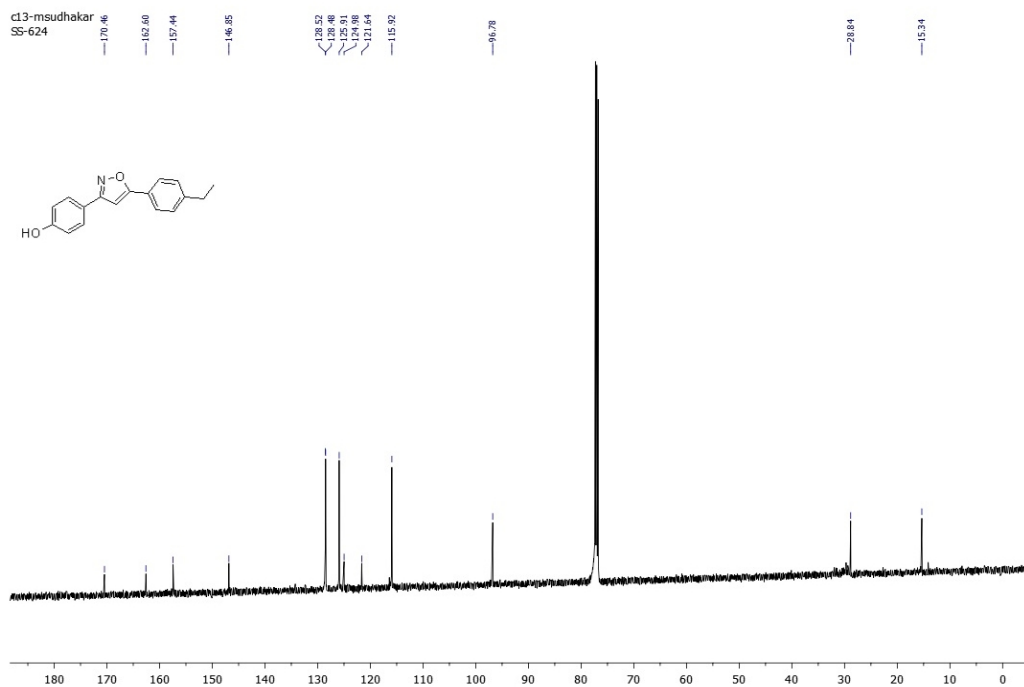

c13-msudhakar  
SS-624

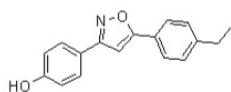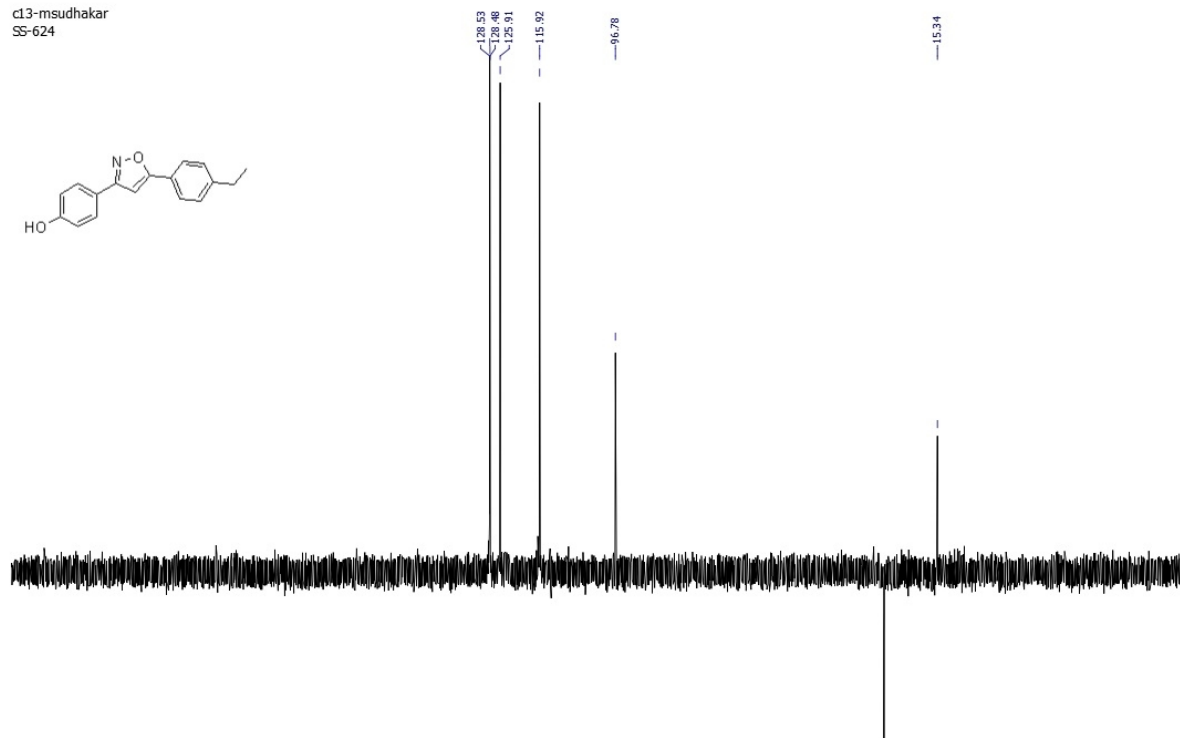

S3.8.  $^1\text{H}$ ,  $^{13}\text{C}$  and DEPT135 NMR spectra of 3-((3-(p-tolyl) isoxazole-5yl) methyl)-1H-indene-1,2(3H)-dione (**4h**)

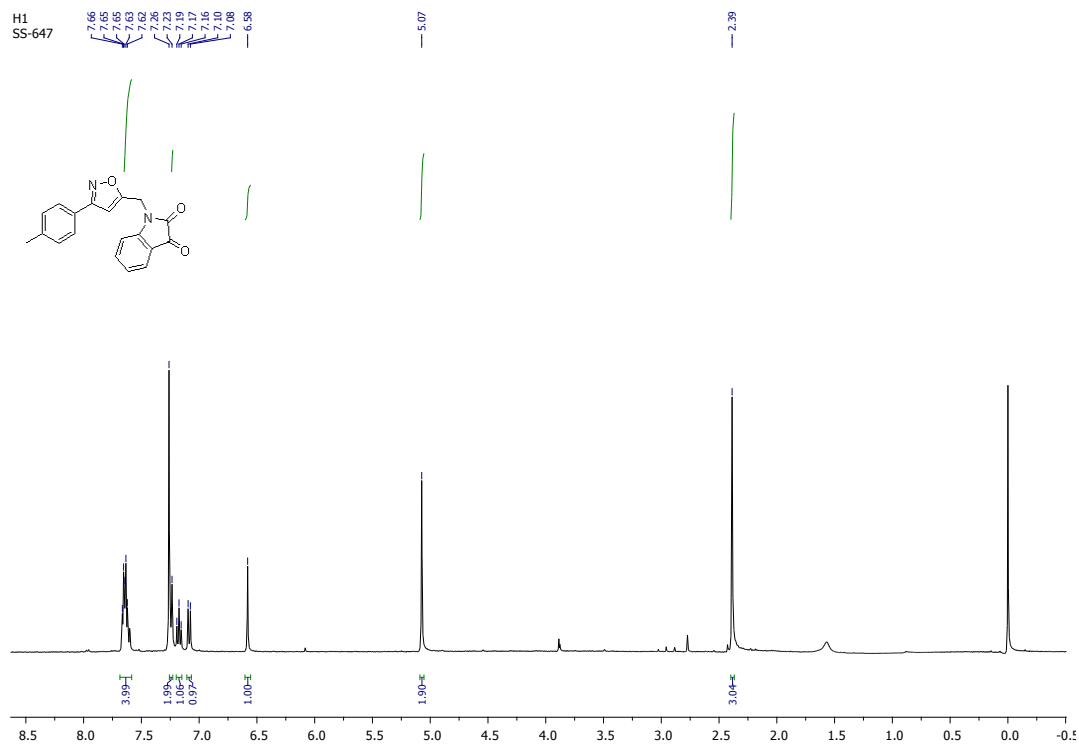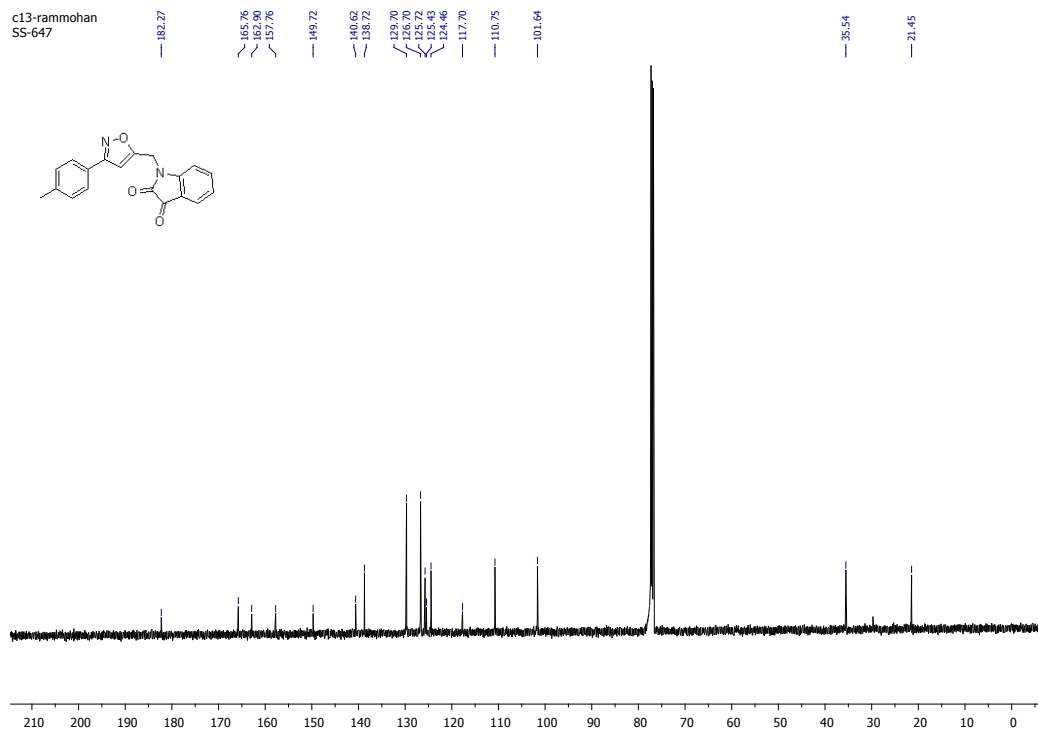

c13-rammohan  
SS-647

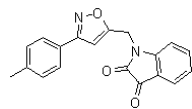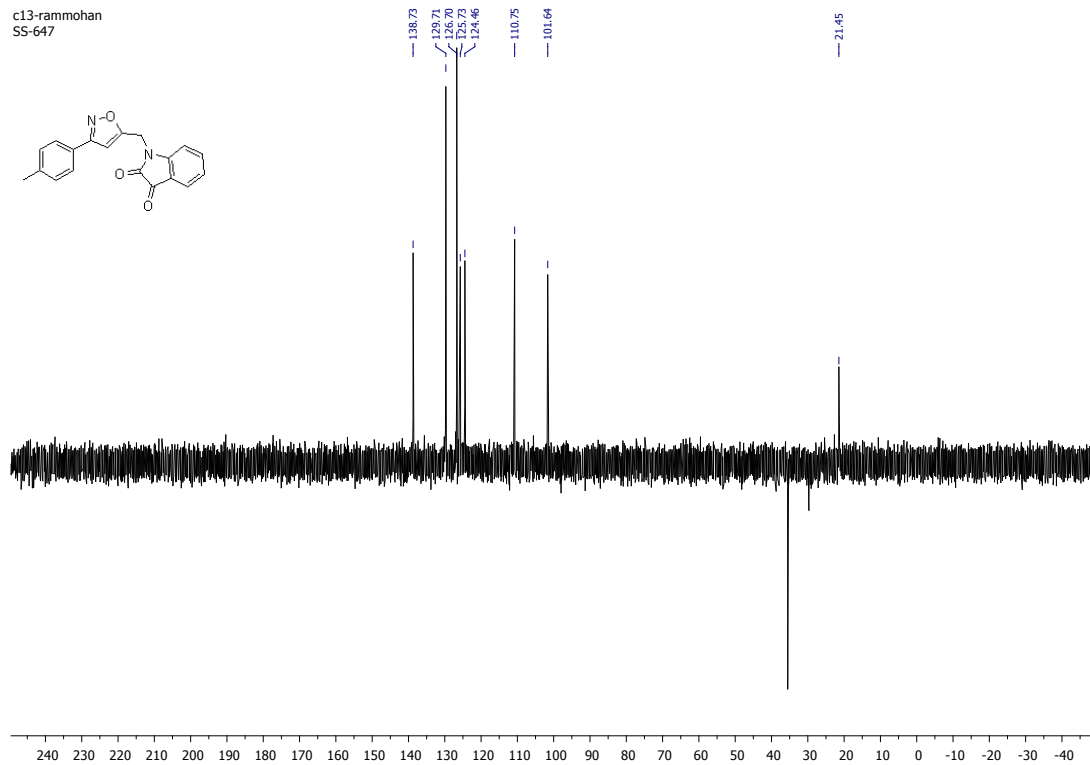



S3.9.  $^1\text{H}$ ,  $^{13}\text{C}$  and DEPT135 NMR spectra of 3-(3-(p-tolyl) isoxazole-5-yl) phenol (**4i**)

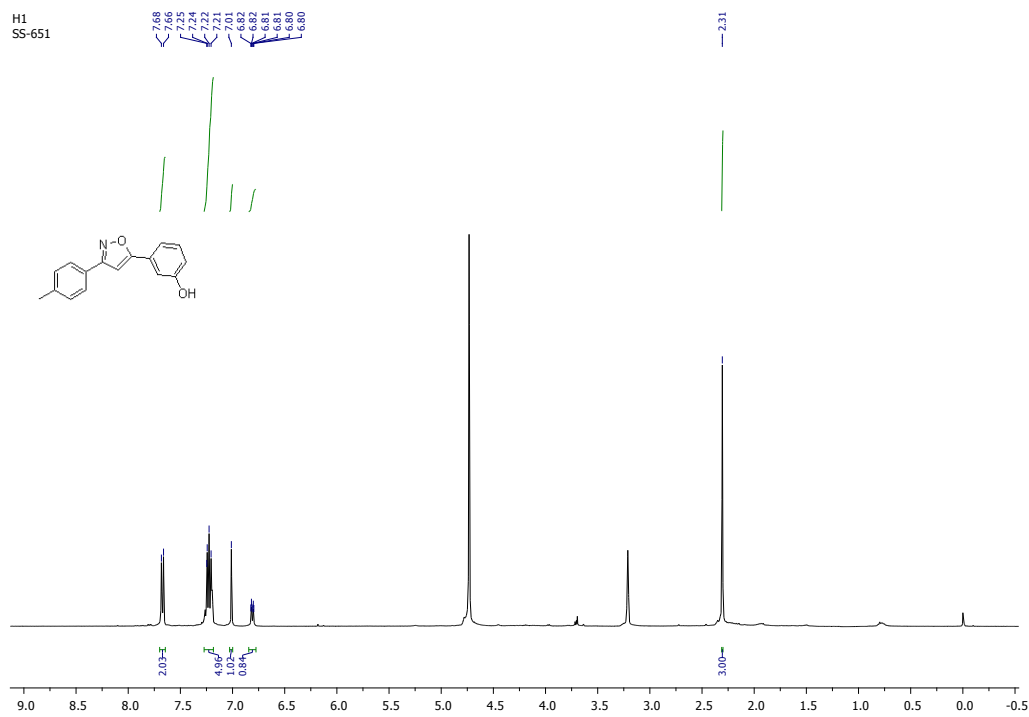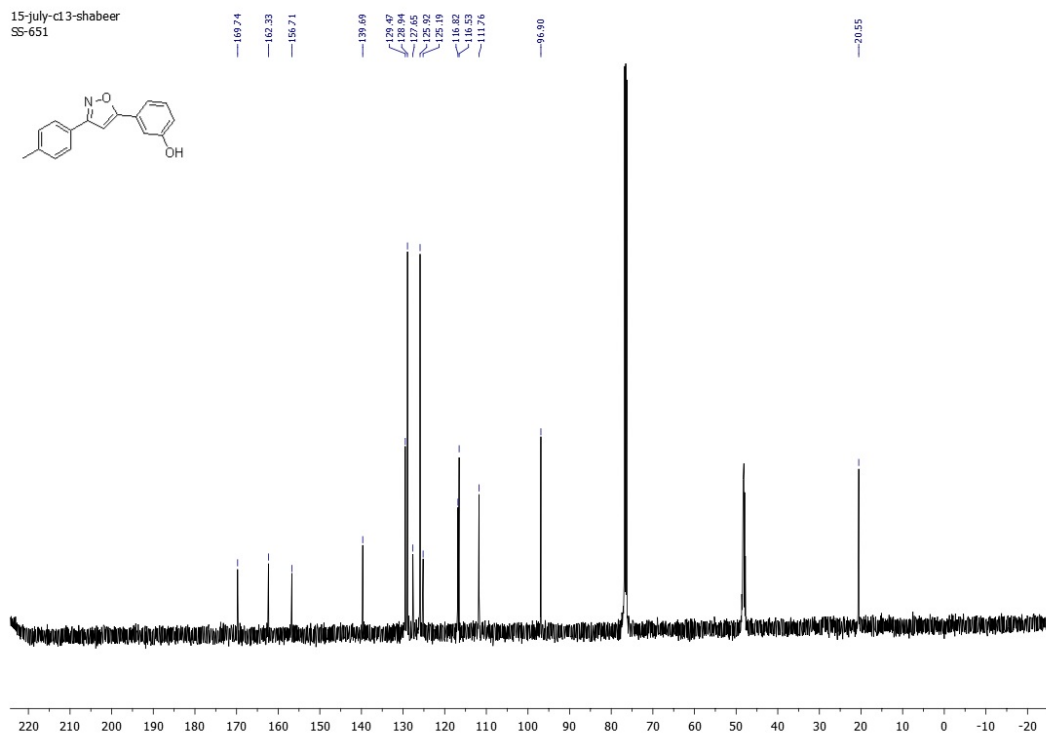

15-july-c13-shabeer  
SS-651

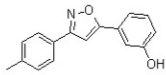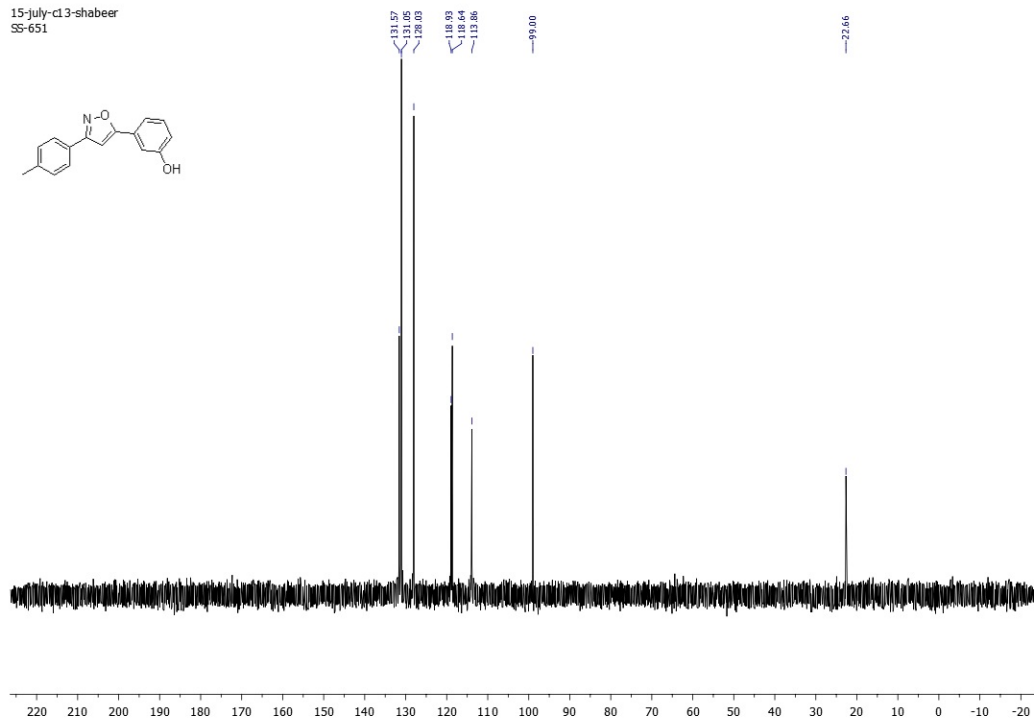

S3.10.  $^1\text{H}$ ,  $^{13}\text{C}$  and DEPT135 NMR spectra of 4-(5-(hydroxymethyl) isoxazole-3-yl) phenol (**4j**)

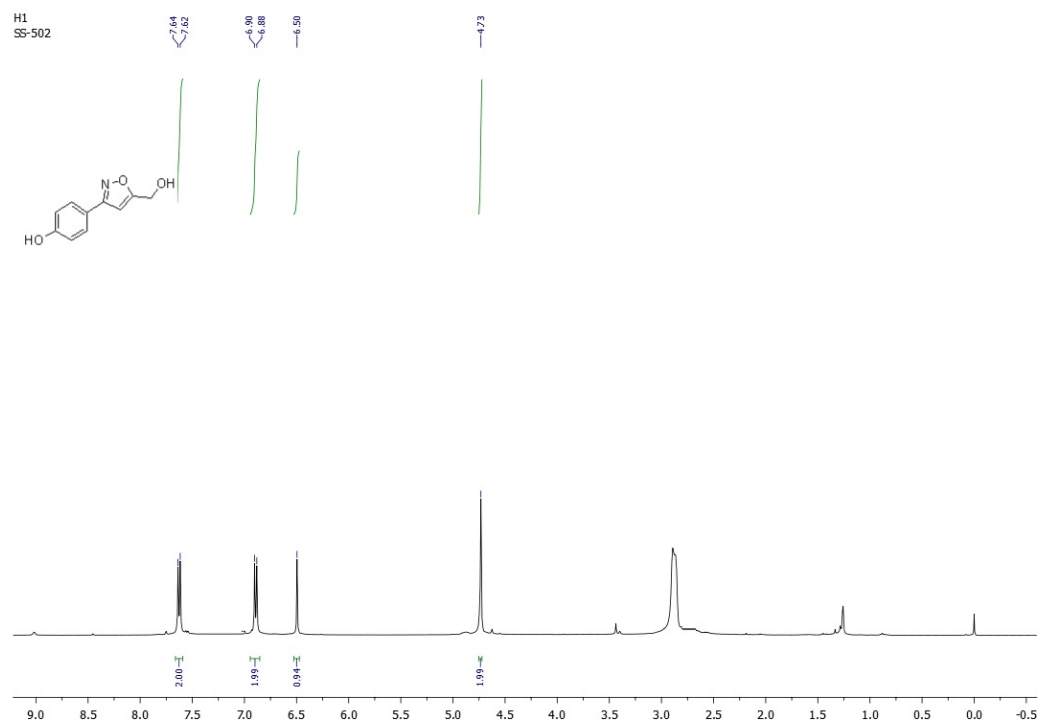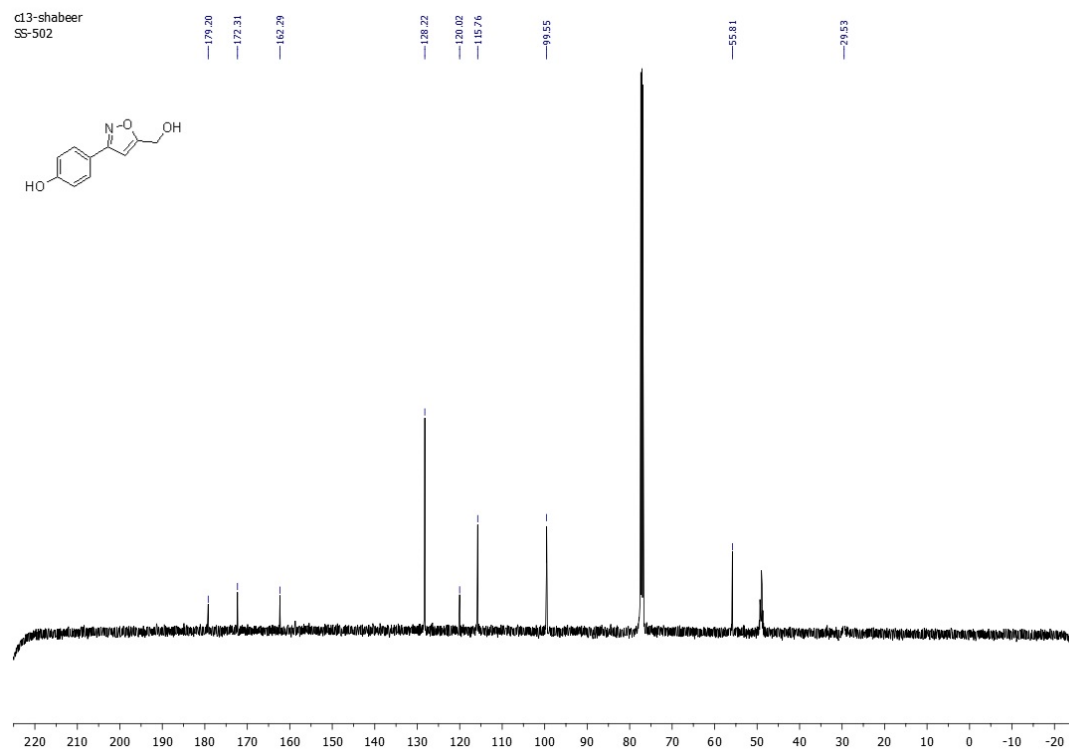

c13-shabeer  
SS-502

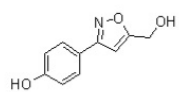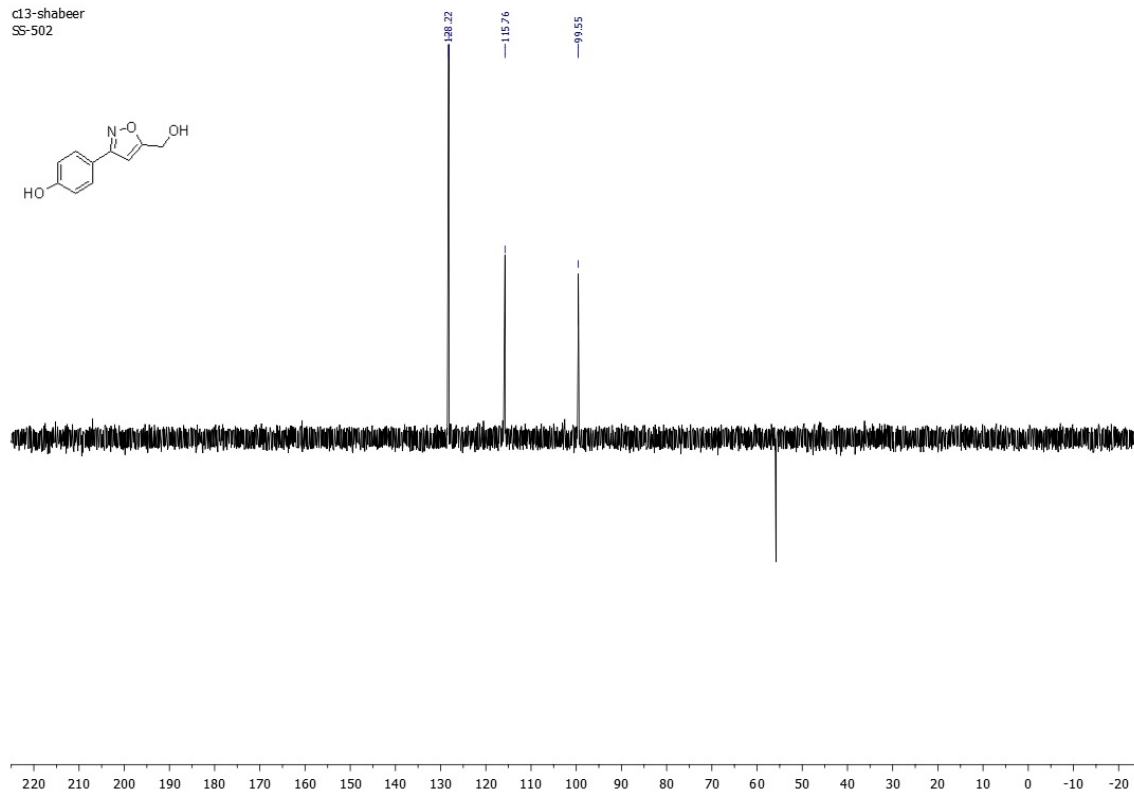

S3.11.  $^1\text{H}$ ,  $^{13}\text{C}$  and DEPT135 NMR spectra of 3-(1H-indol-3-yl)-5-phenylisoxazole (**4k**)

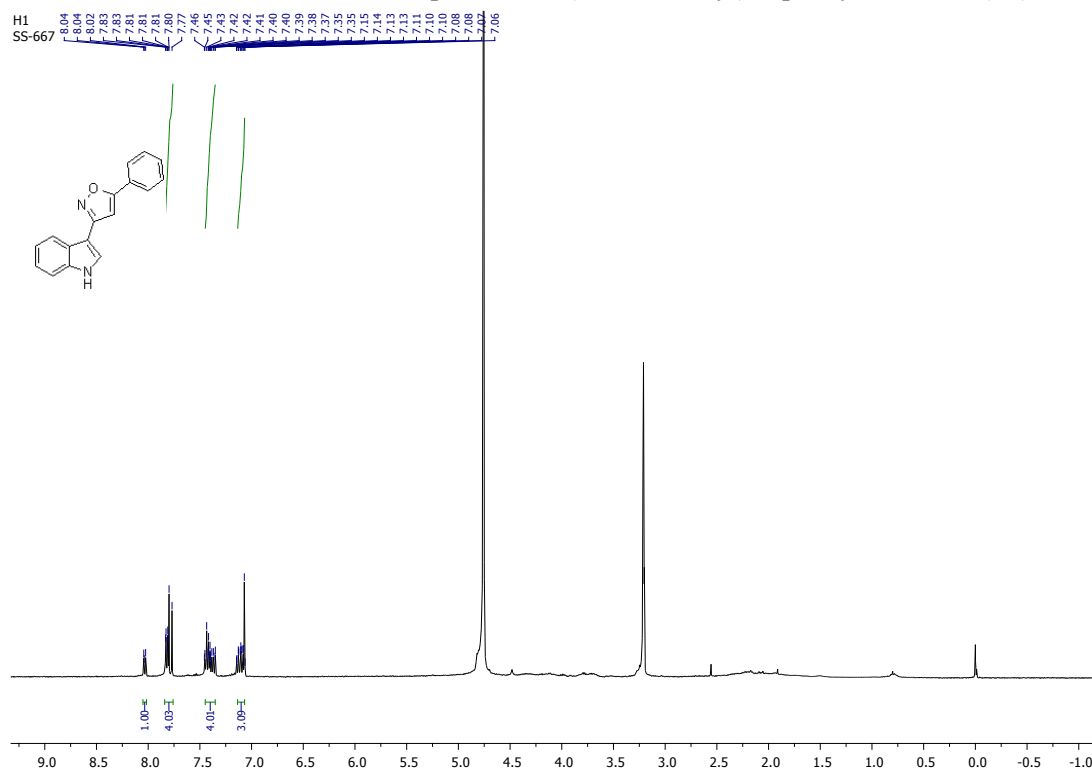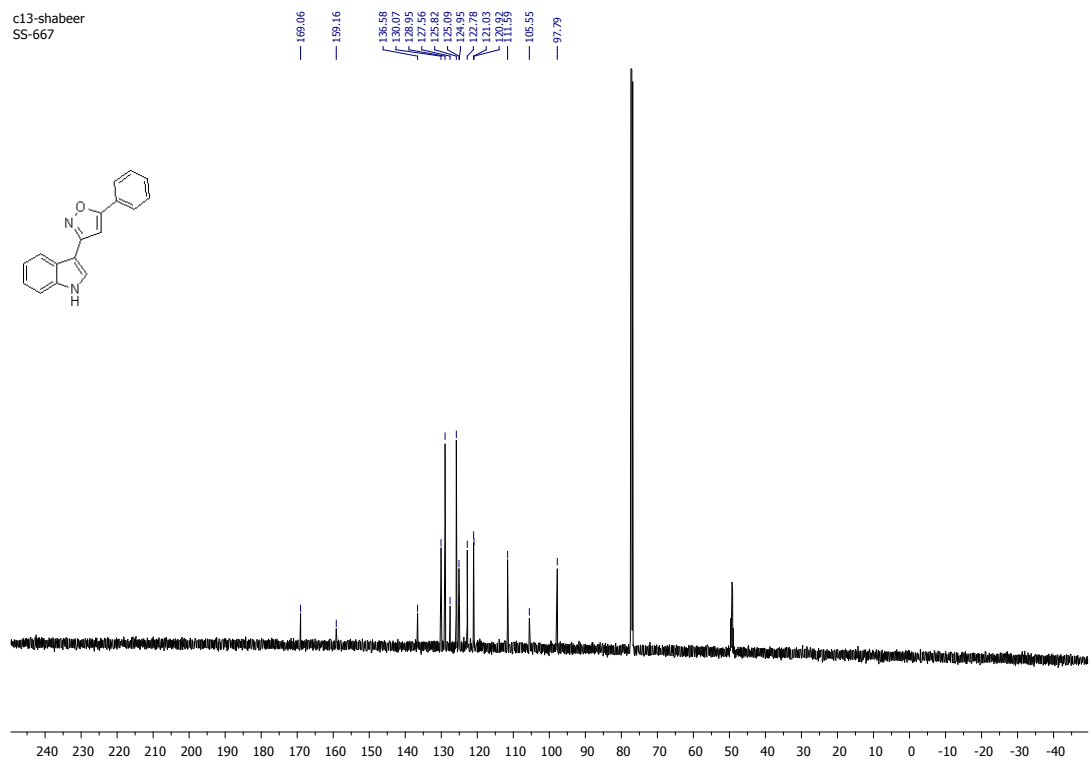

c13-shabeer  
SS-667

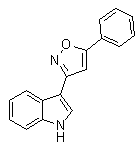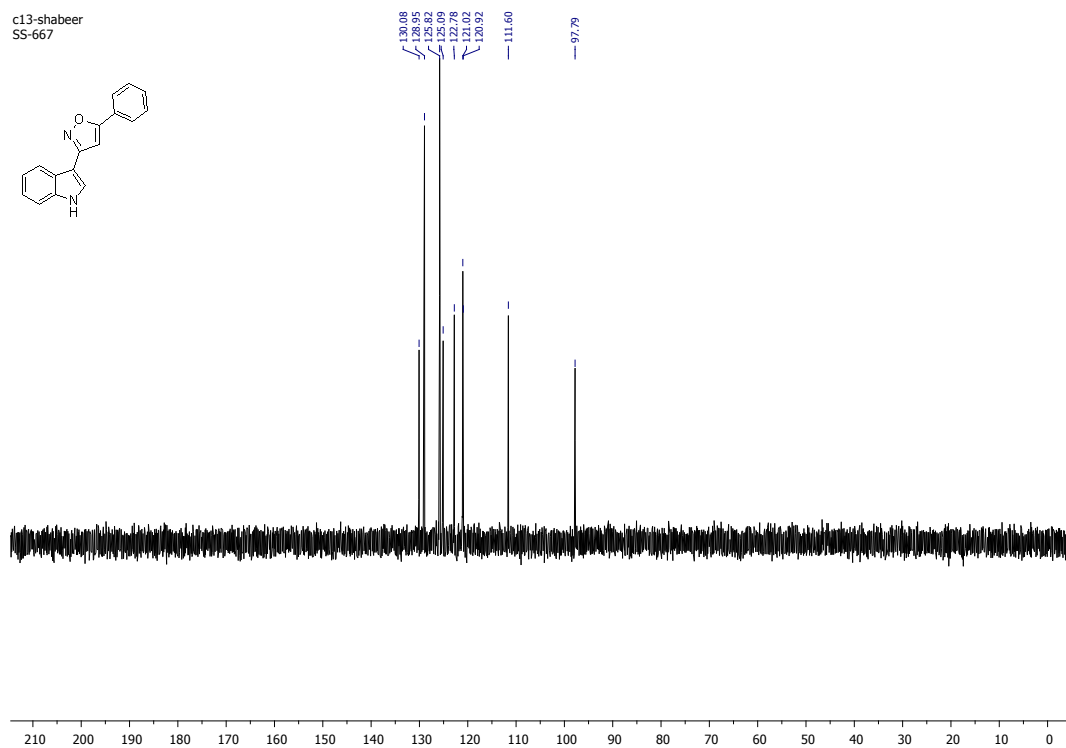

S3.12, <sup>1</sup>H, <sup>13</sup>C and DEPT135 NMR spectra of 5-phenyl-3-(pyridine-2-yl) isoxazole (41)

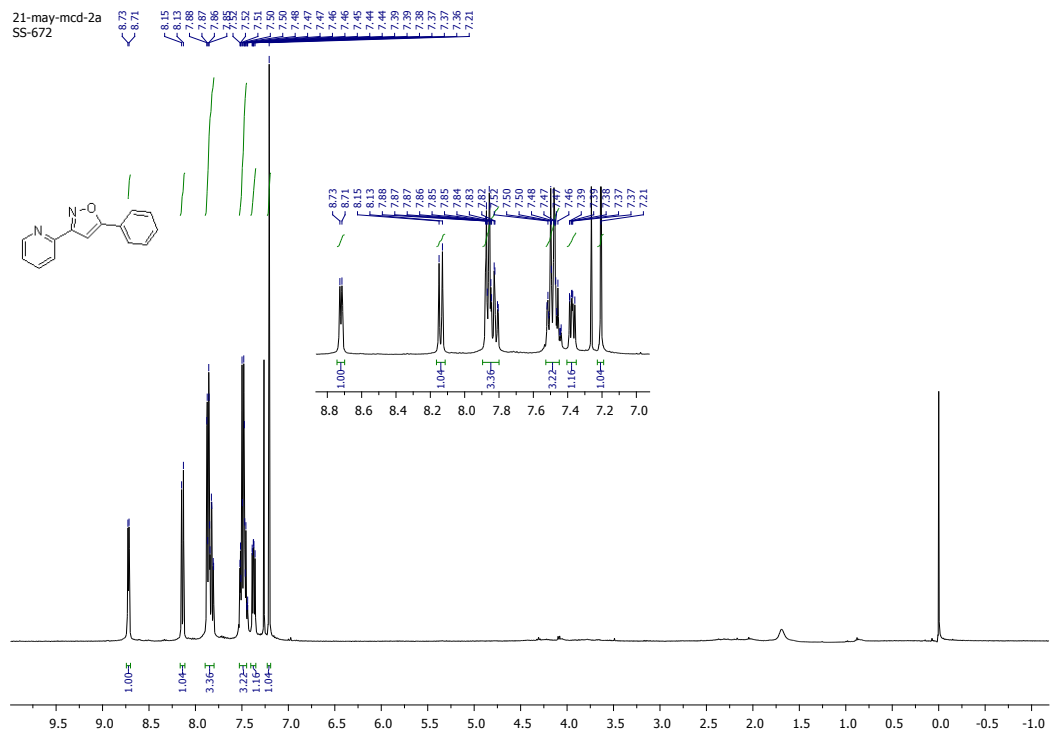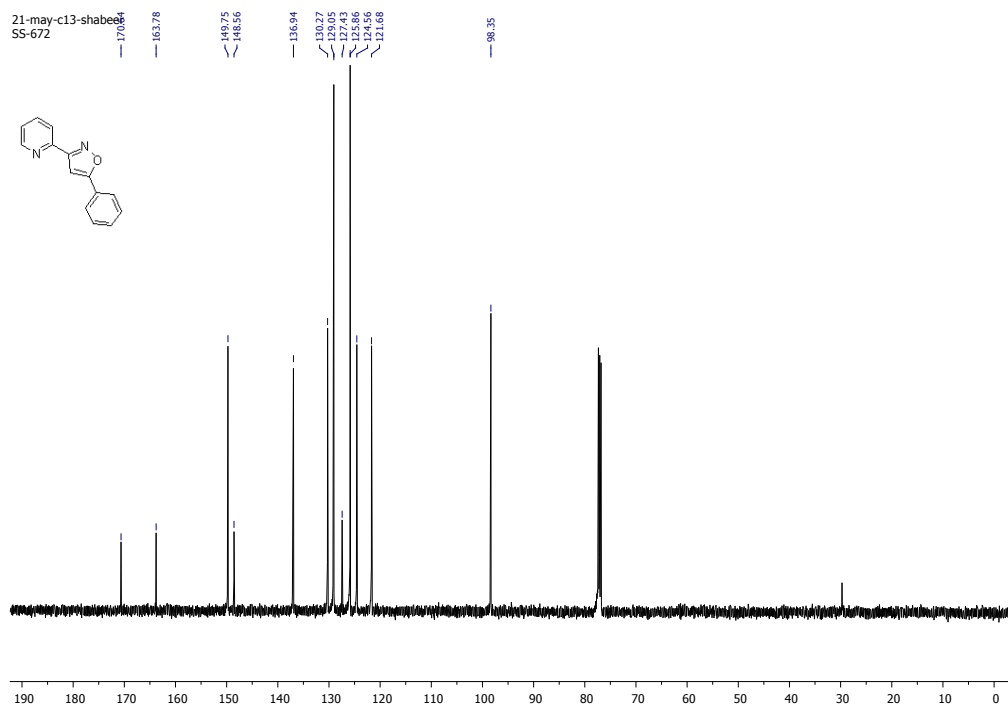

21-may-c13-shabeer  
SS-672

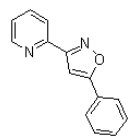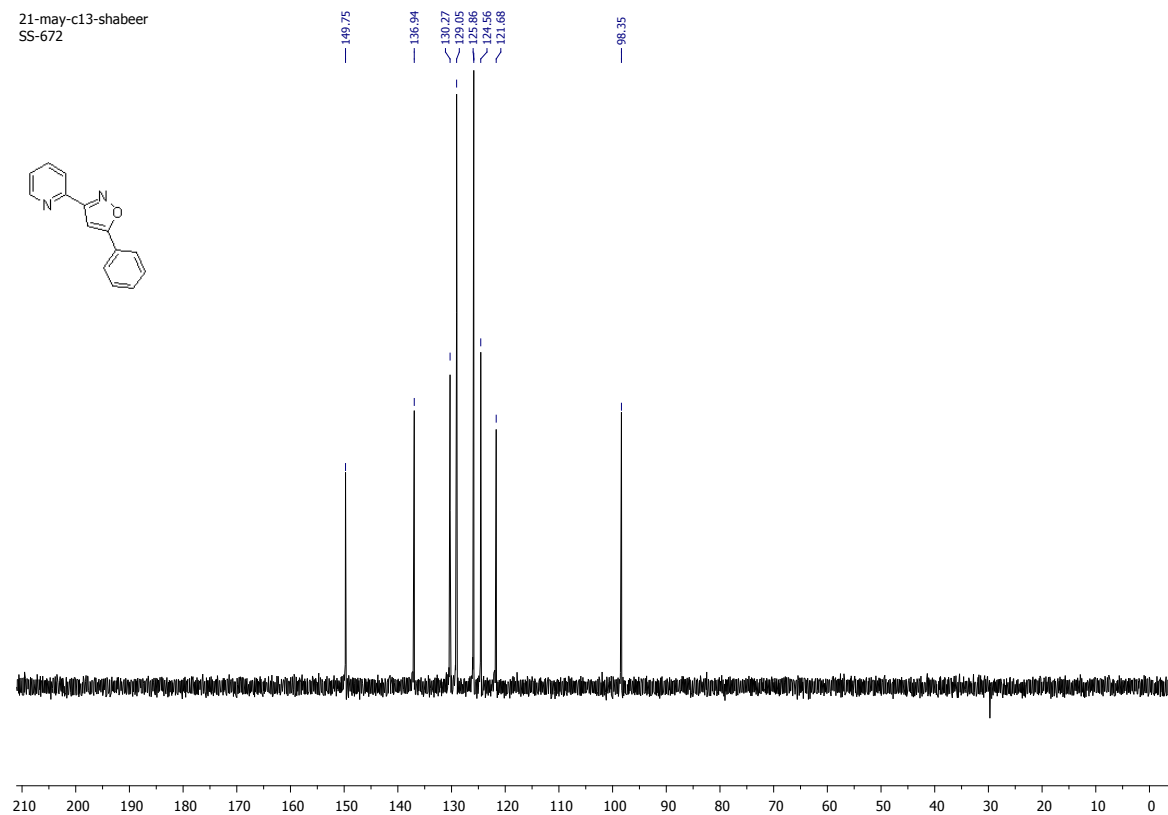



S3.13.  $^1\text{H}$ ,  $^{13}\text{C}$ , and DEPT135 spectra of 3,5-diphenyl-4,5-dihydroisoxazole (**6a**)

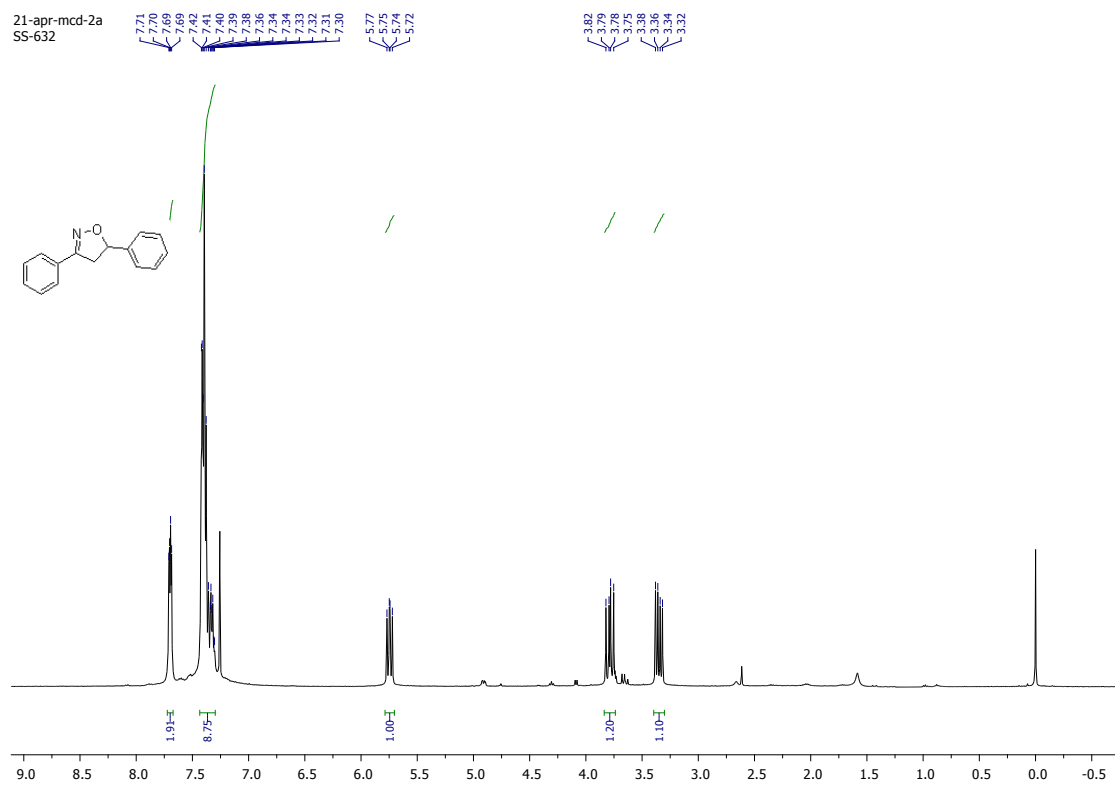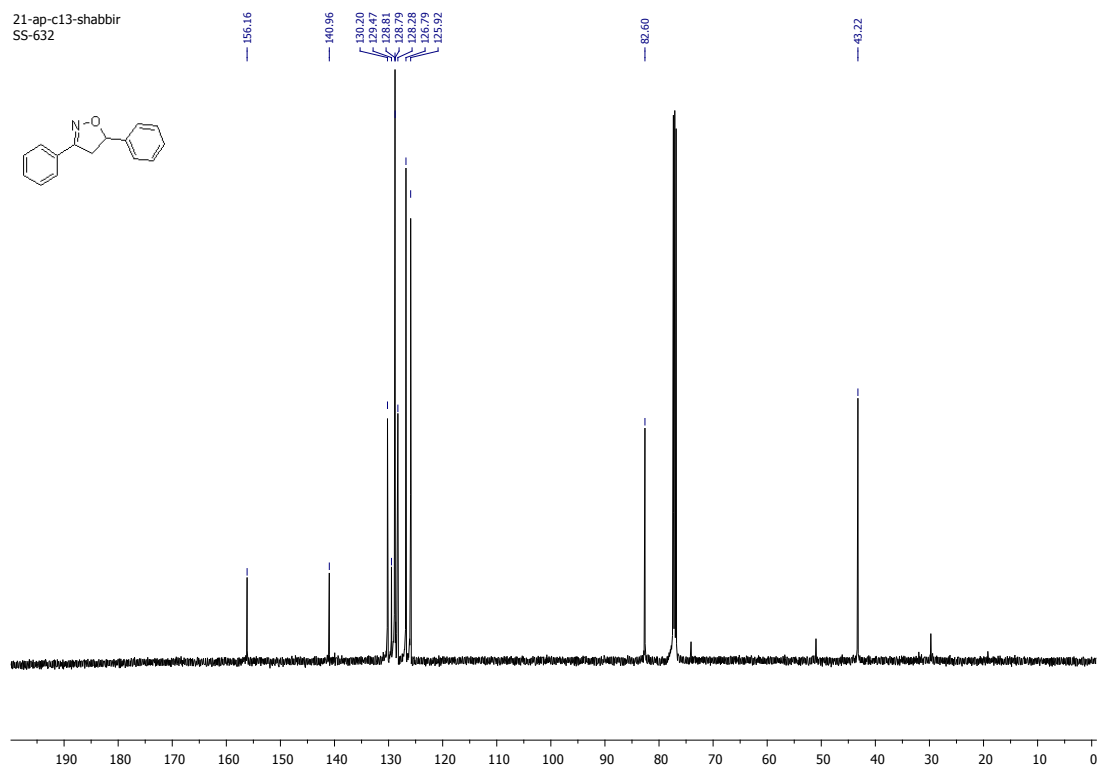

21-ap-c13-shabbir  
SS-632

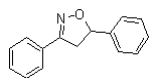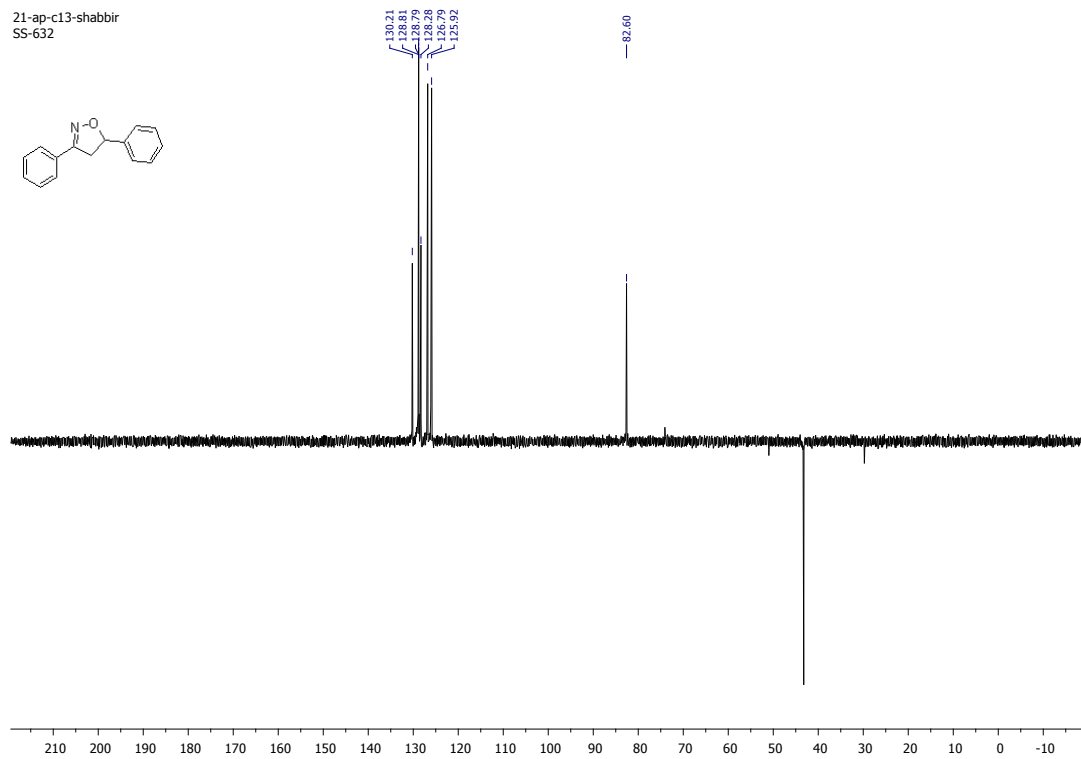

S3.14.  $^1\text{H}$ ,  $^{13}\text{C}$ , and DEPT135 spectra of 4-(5-(4-fluorophenyl)-4, 5-dihydroisoxazol-3-yl) phenol (**6b**)

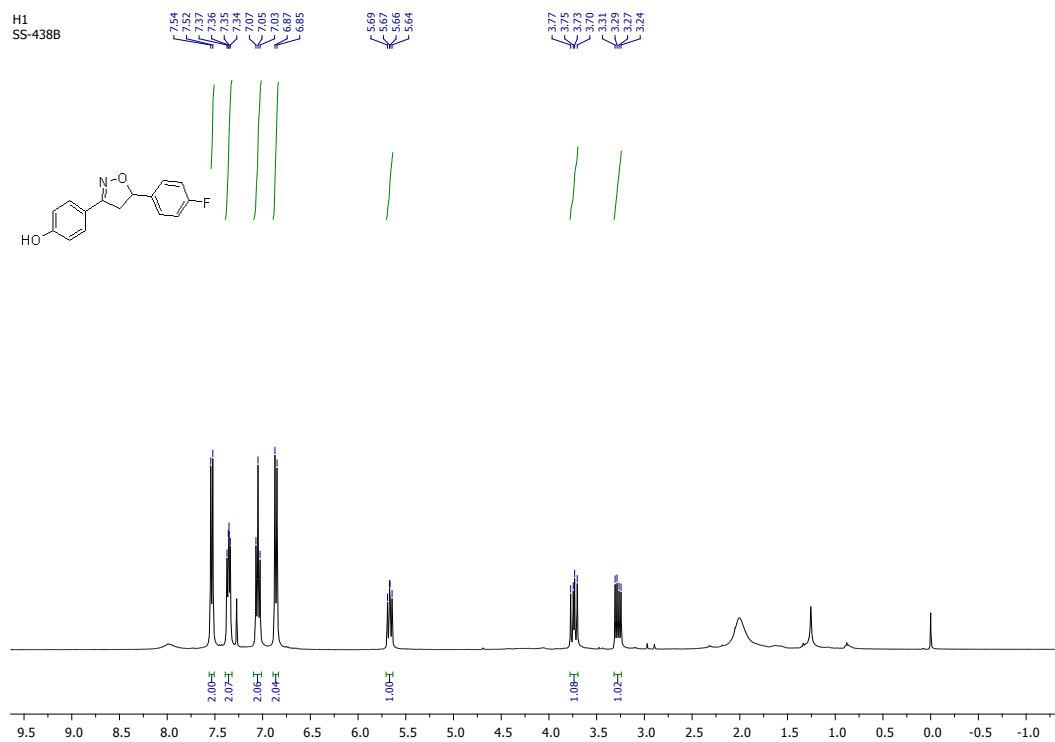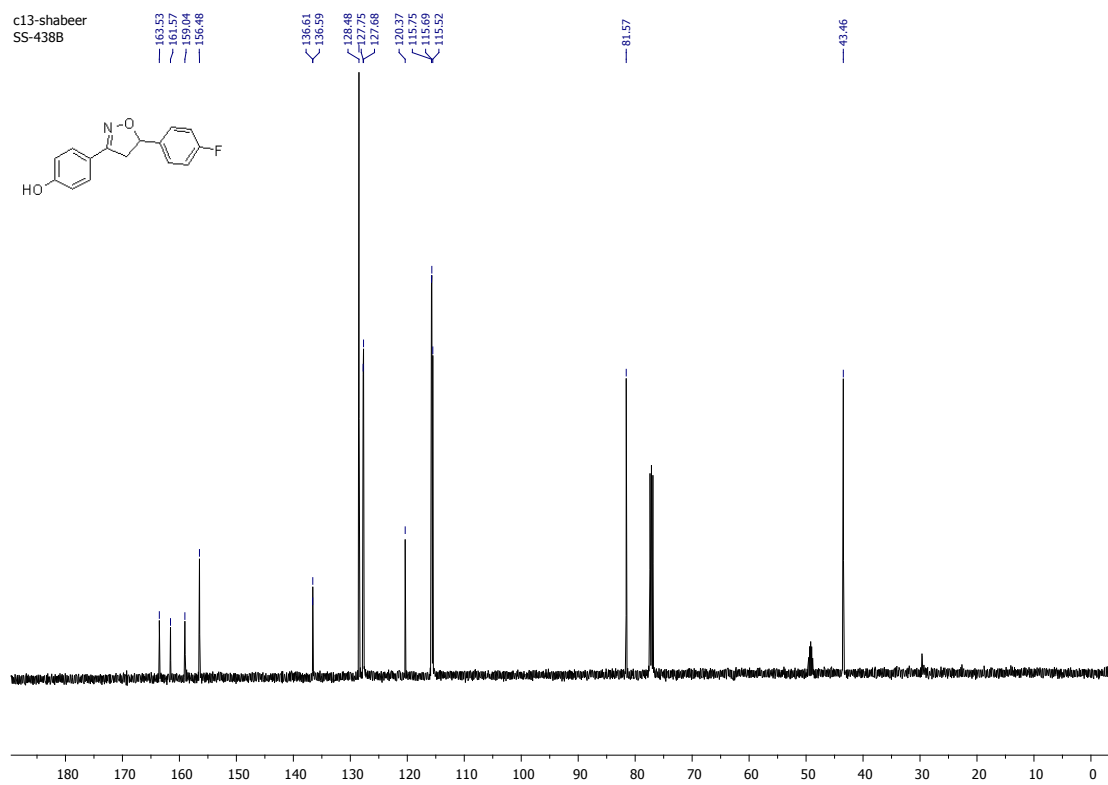

c13-shabeer  
SS-438B

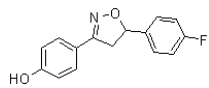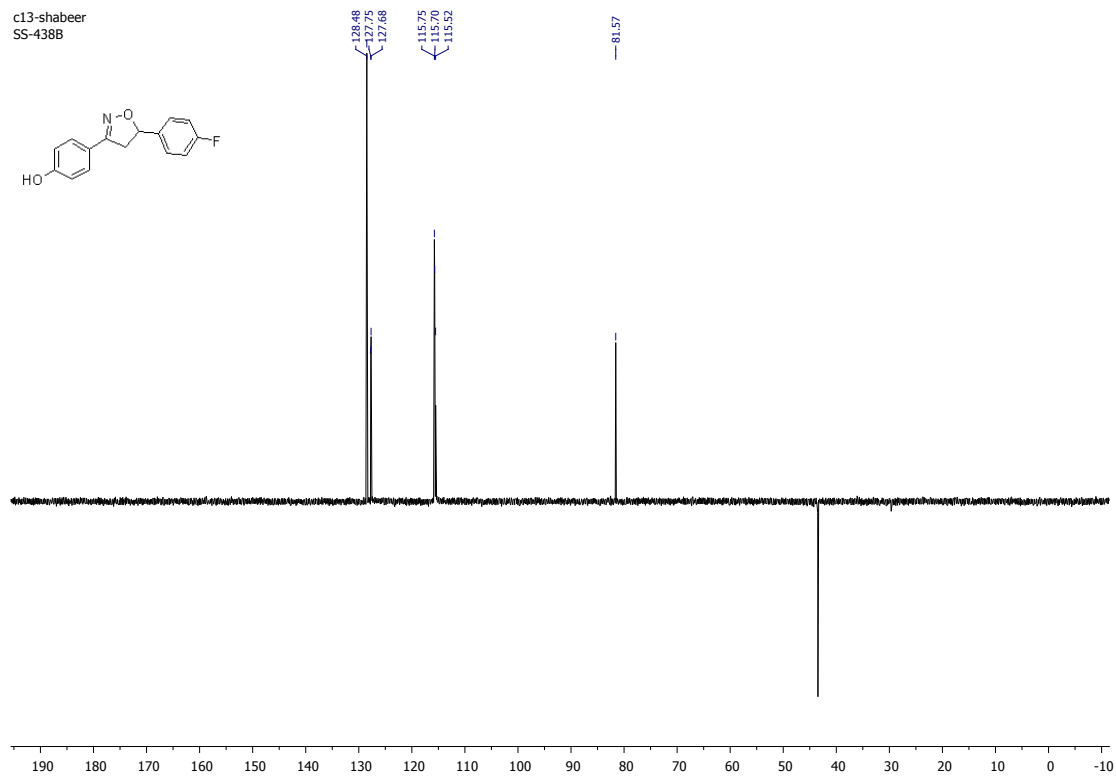

S3.15.  $^1\text{H}$ ,  $^{13}\text{C}$ , and DEPT135 spectra of 3-(2-ethoxyphenyl)-5-(4-fluorophenyl)-4,5-dihydroisoxazole (**6c**)

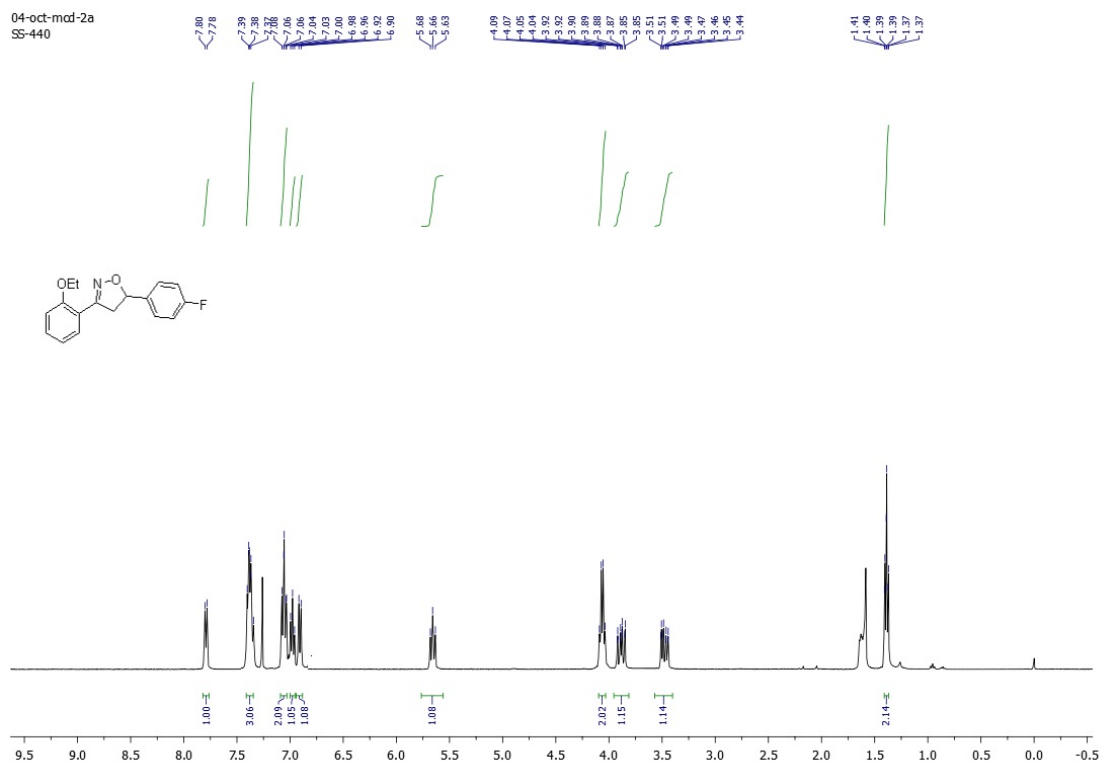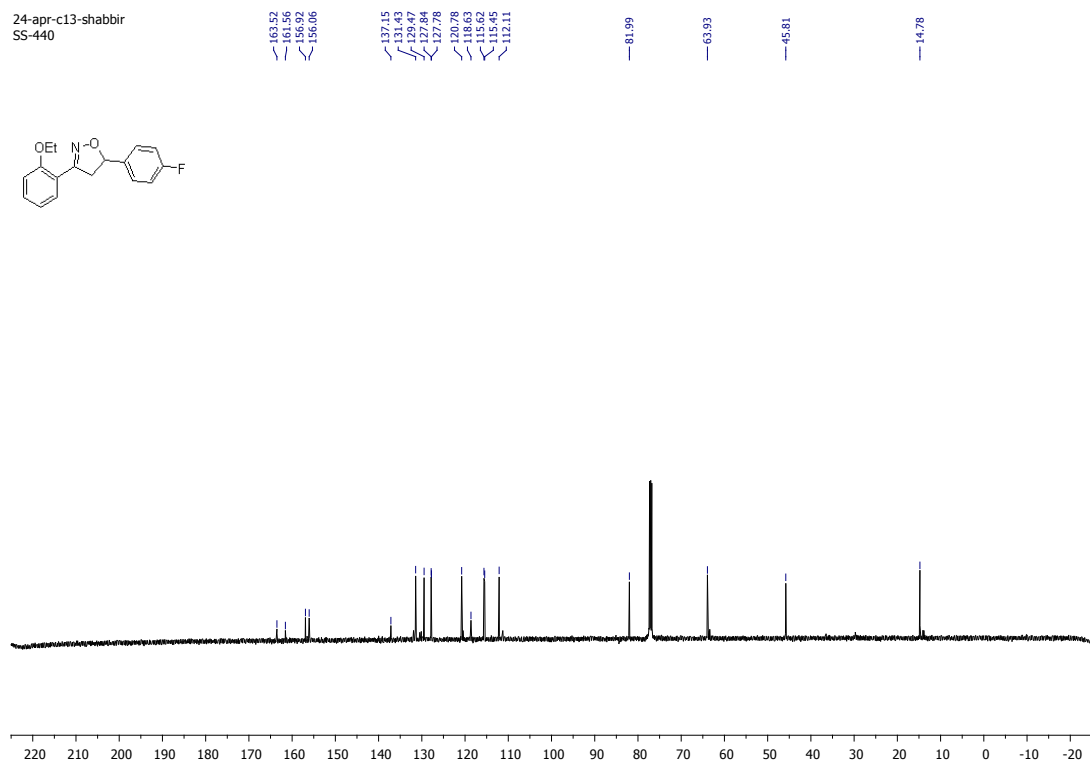

24-apr-c13-shabbir  
SS-440

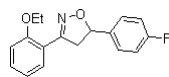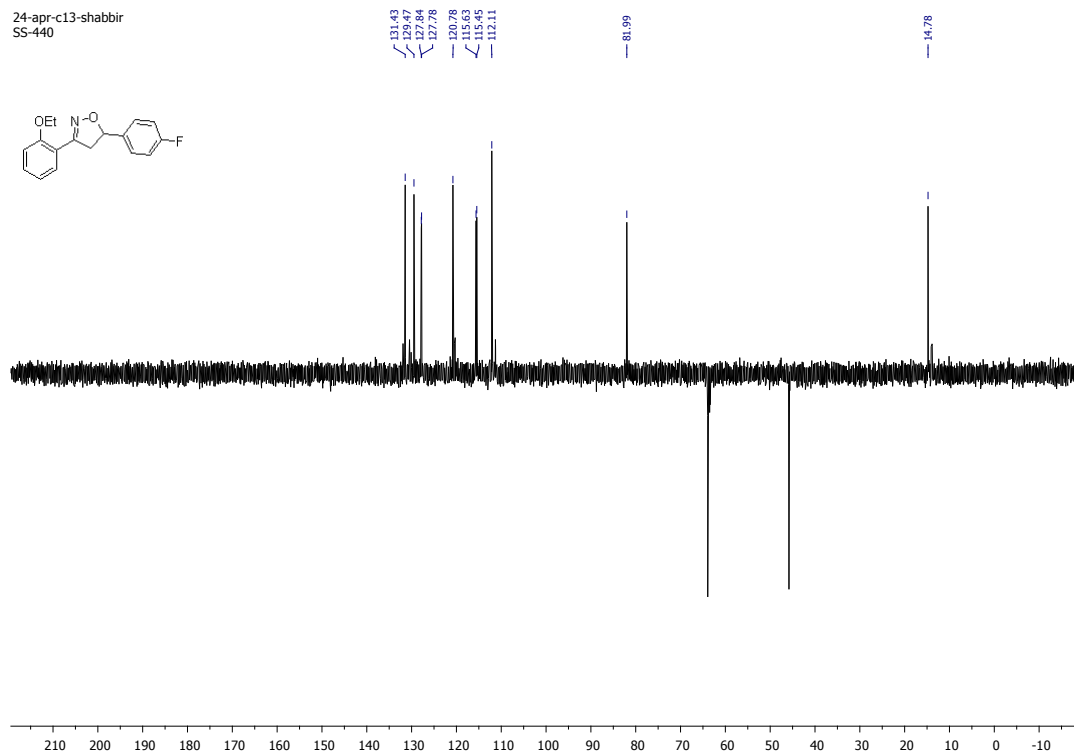

S3.16.  $^1\text{H}$ ,  $^{13}\text{C}$ , and DEPT135 spectra of 4-(5-phenyl-4, 5-dihydroisoxazole-3-yl) phenol (**6d**)

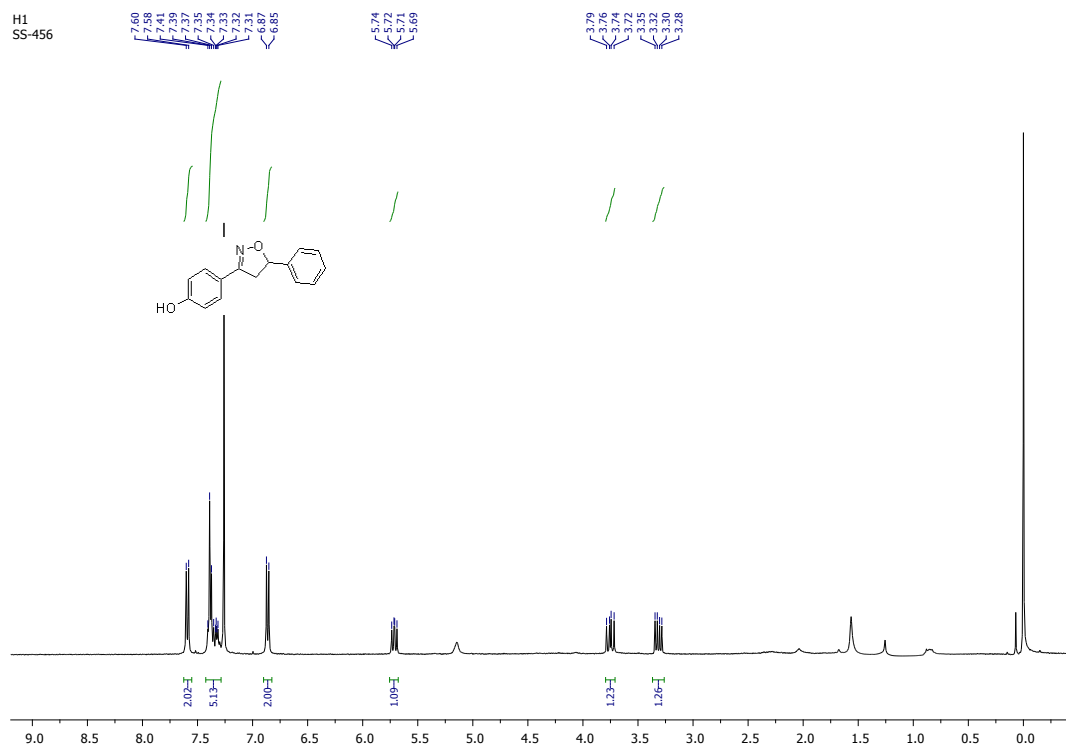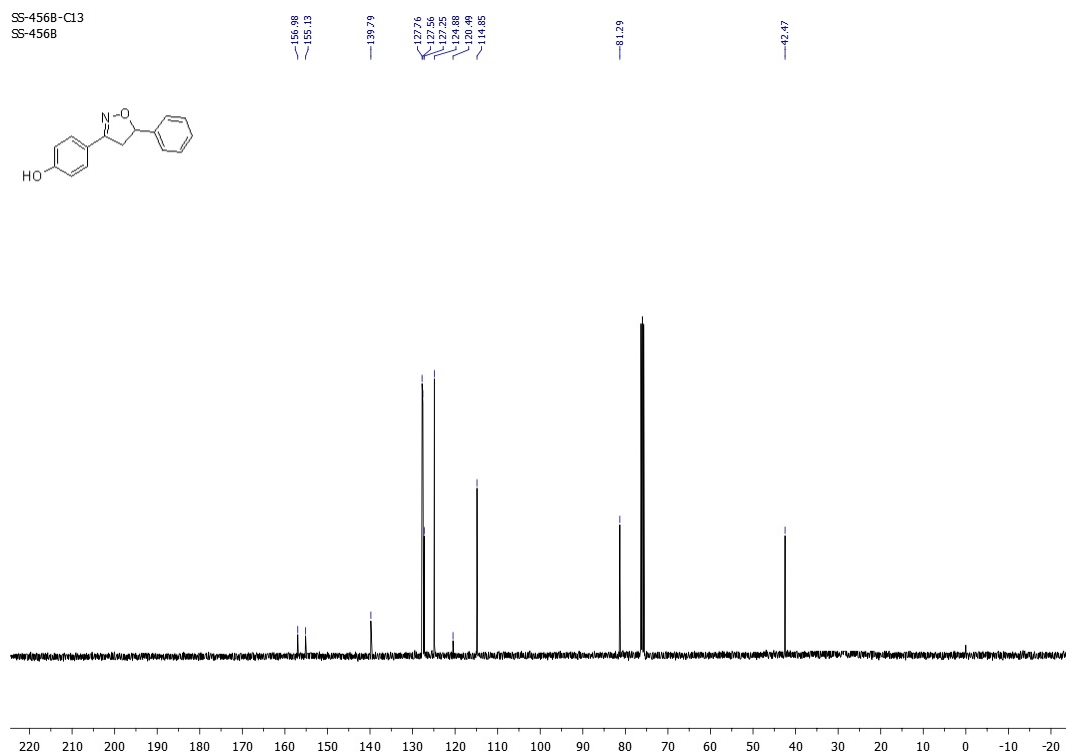

SS-456B-C13  
SS-456B

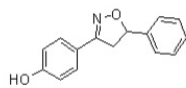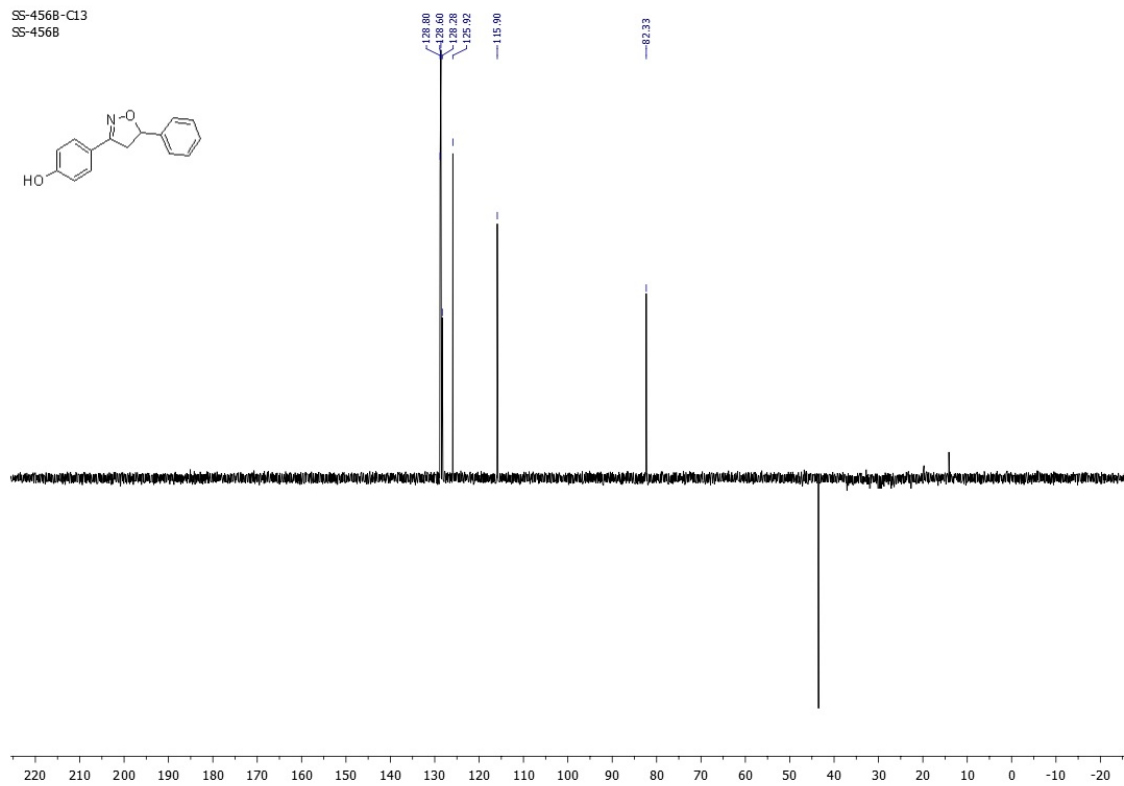



S3.17.  $^1\text{H}$ ,  $^{13}\text{C}$  and DEPT135 NMR spectra of 3-(4-methoxyphenyl)-5-phenyl-4,5-dihydroisoxazole (**6e**)

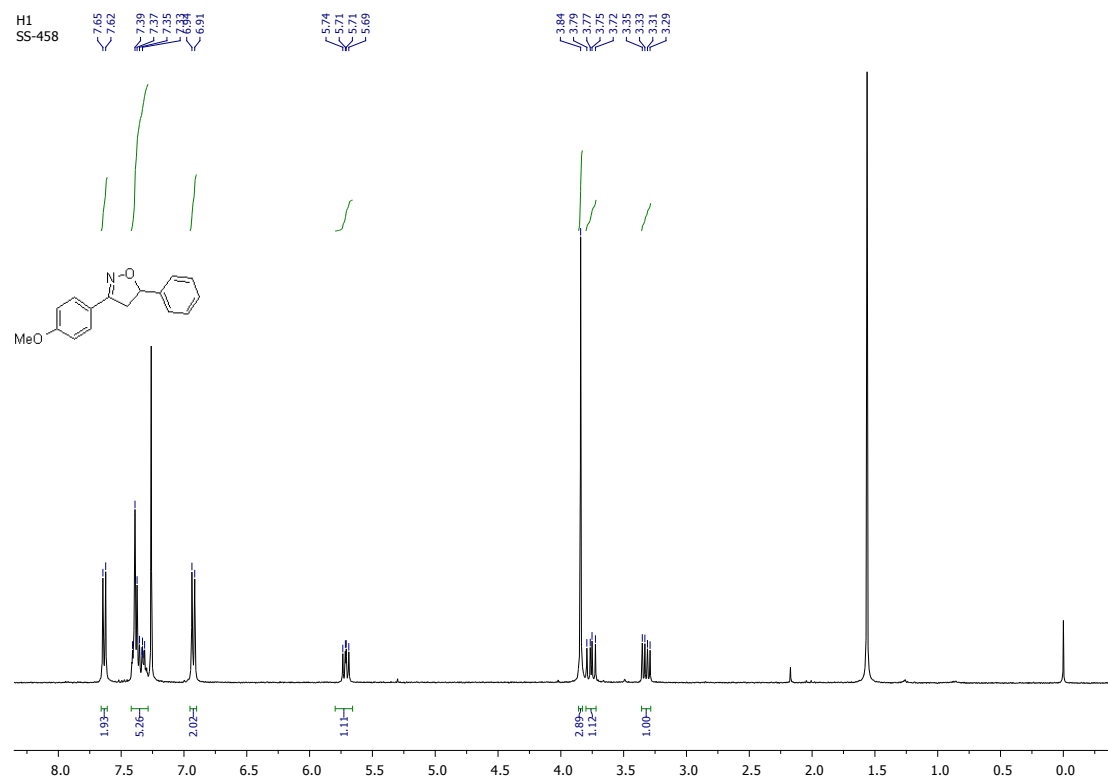

S3.18.  $^1\text{H}$ ,  $^{13}\text{C}$  and DEPT135 NMR spectra of 5-phenyl-3-(p-tolyl)-4,5-dihydroisoxazole (**6f**)

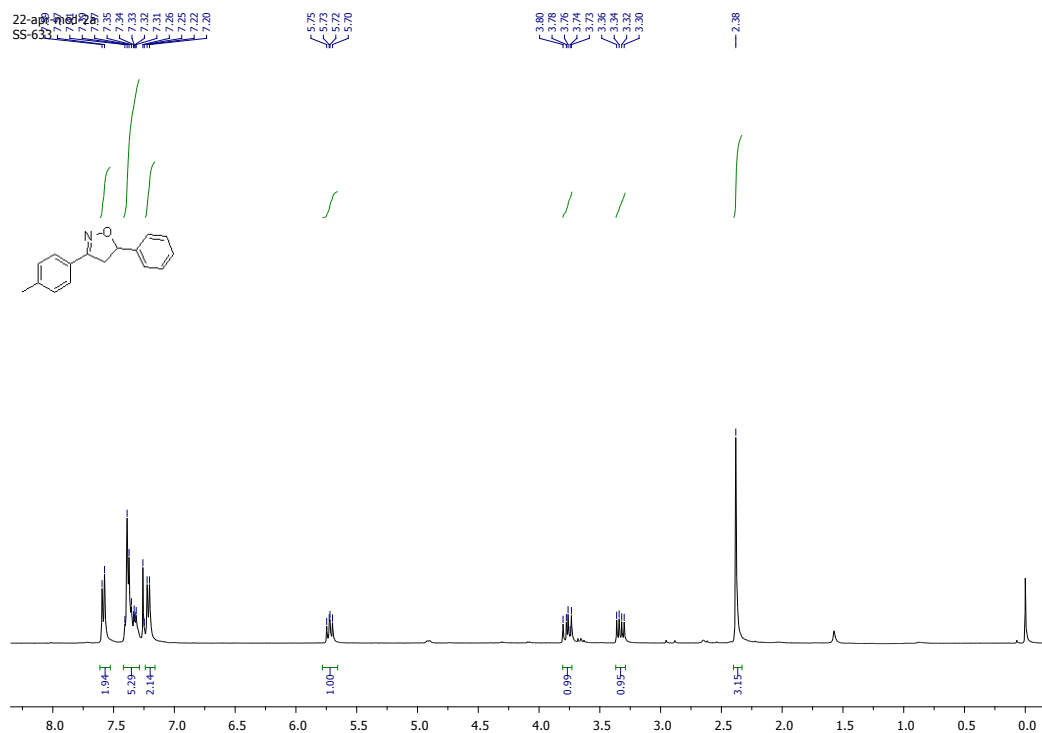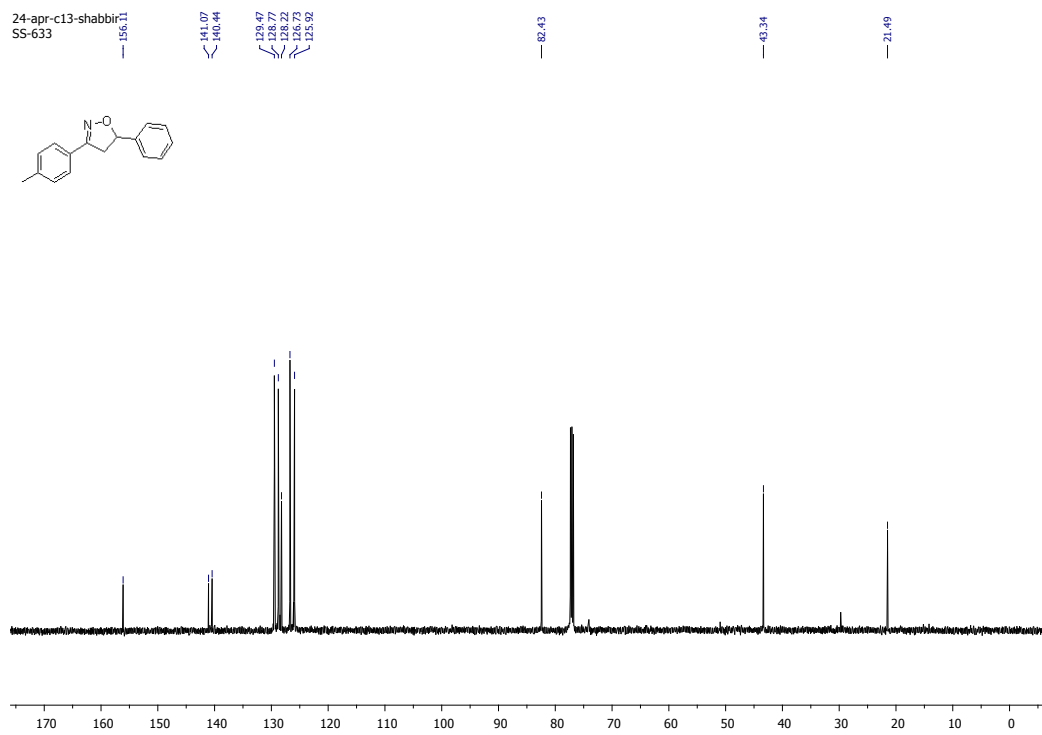

24-apr-c13-shabbir  
SS-633

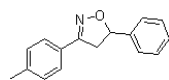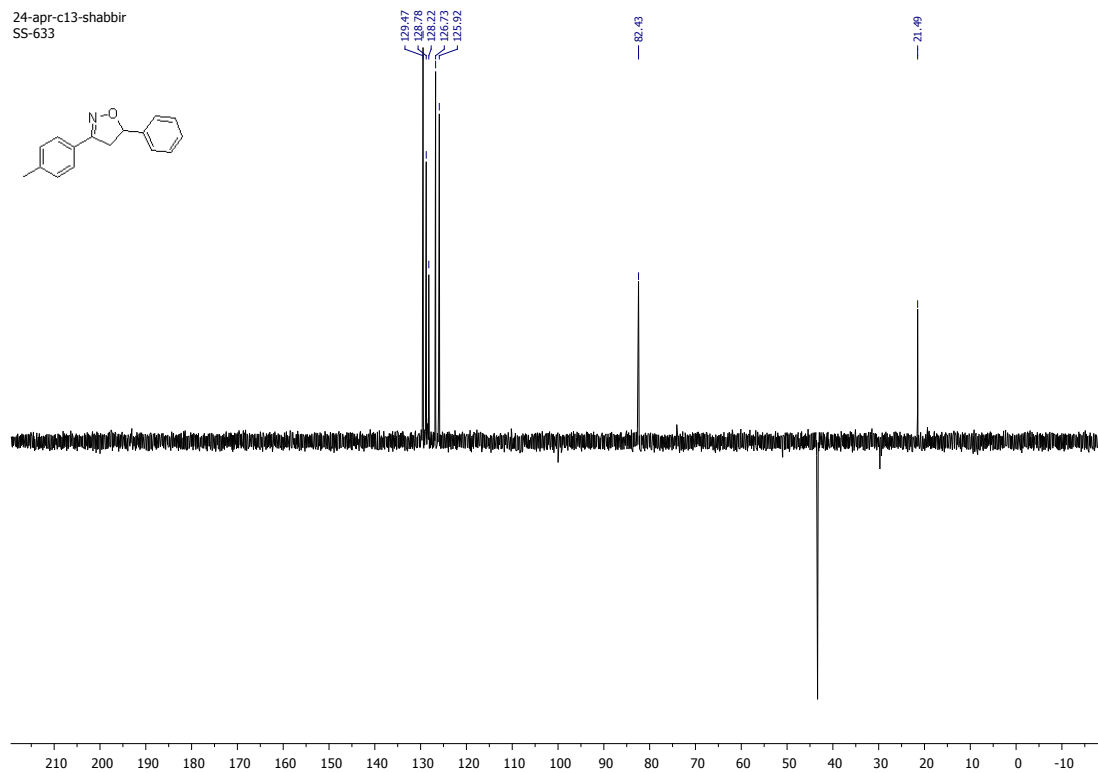

S3.19.  $^1\text{H}$ ,  $^{13}\text{C}$ , and DEPT135 NMR spectra of 5-phenyl-3-(o-tolyl)-4, 5-dihydroisoxazole (**6g**)

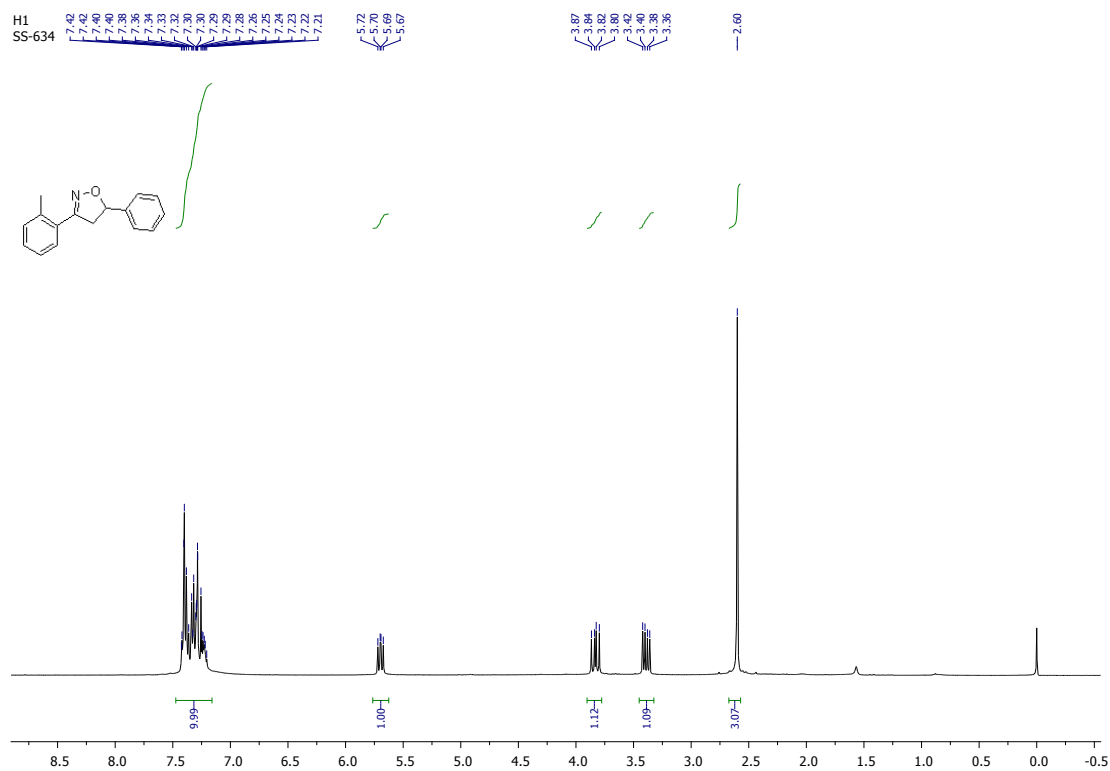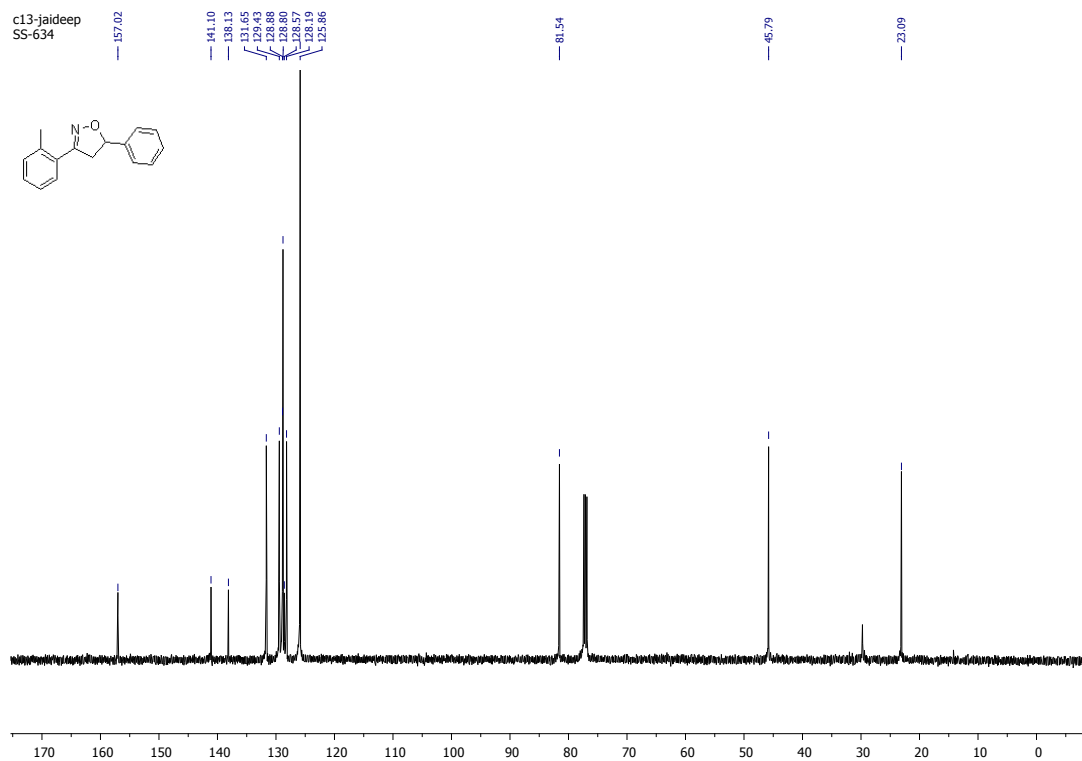

c13-jaideep  
SS-634

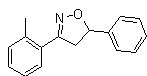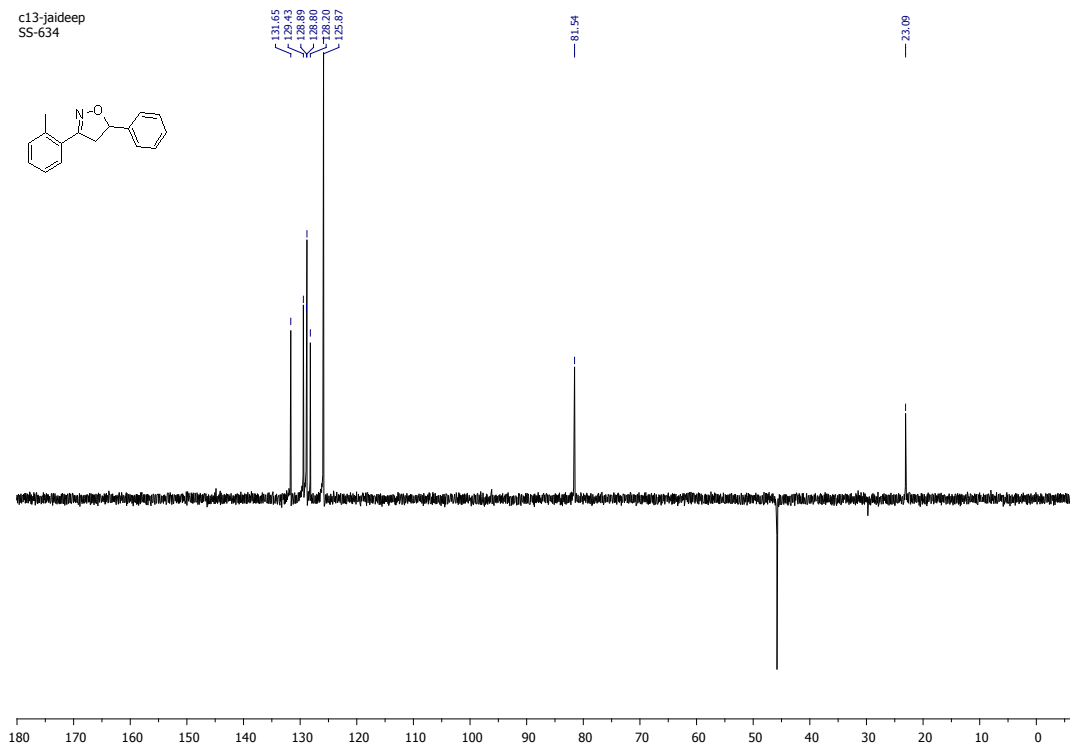

S3.20.  $^1\text{H}$ ,  $^{13}\text{C}$ , and DEPT135 NMR spectra of 5-(3, 4-dimethoxyphenyl)-3-phenyl-4,5-dihydroisoxazole (6h)

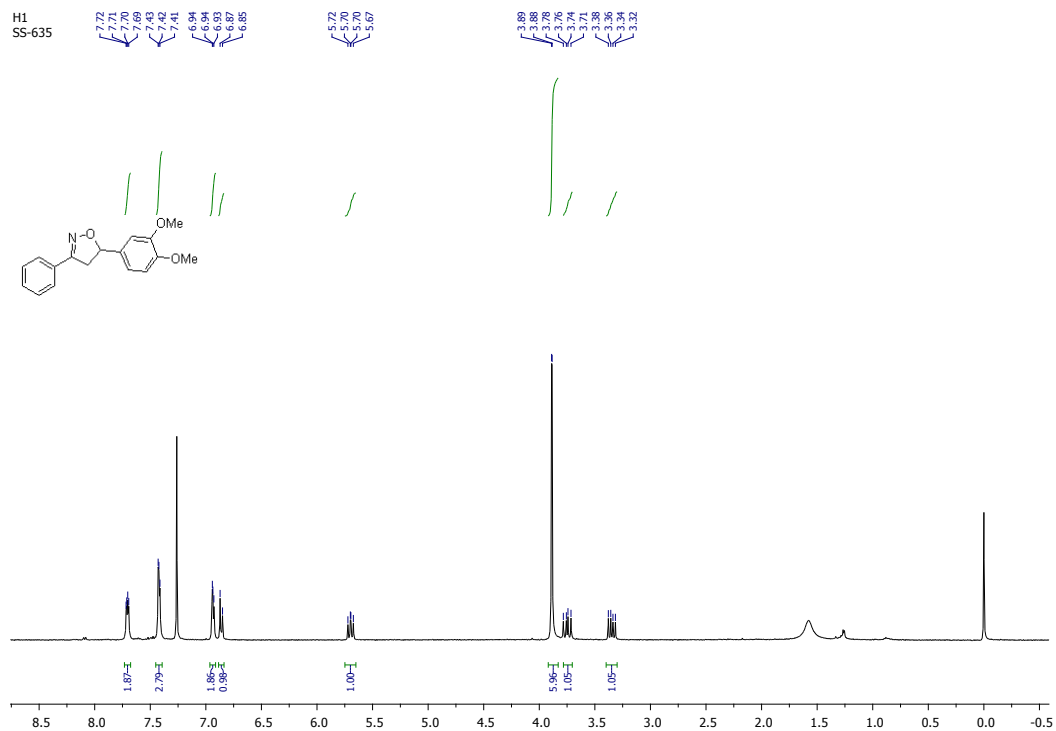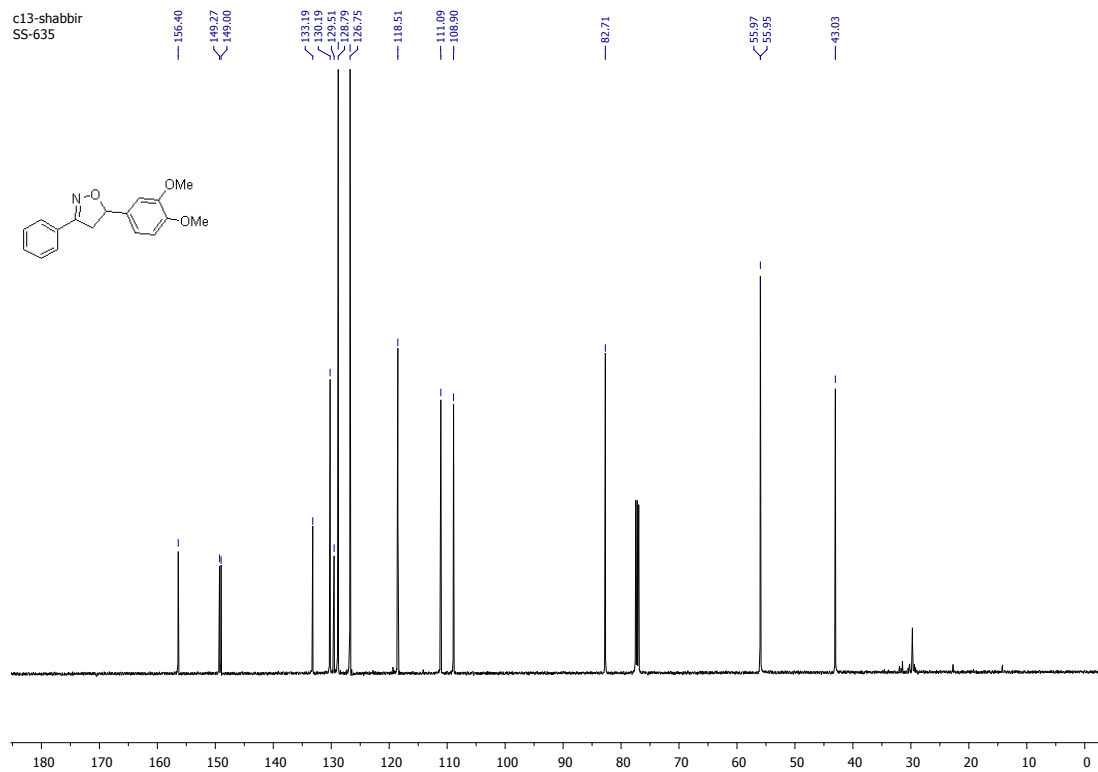

c13-shabbir  
SS-635

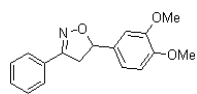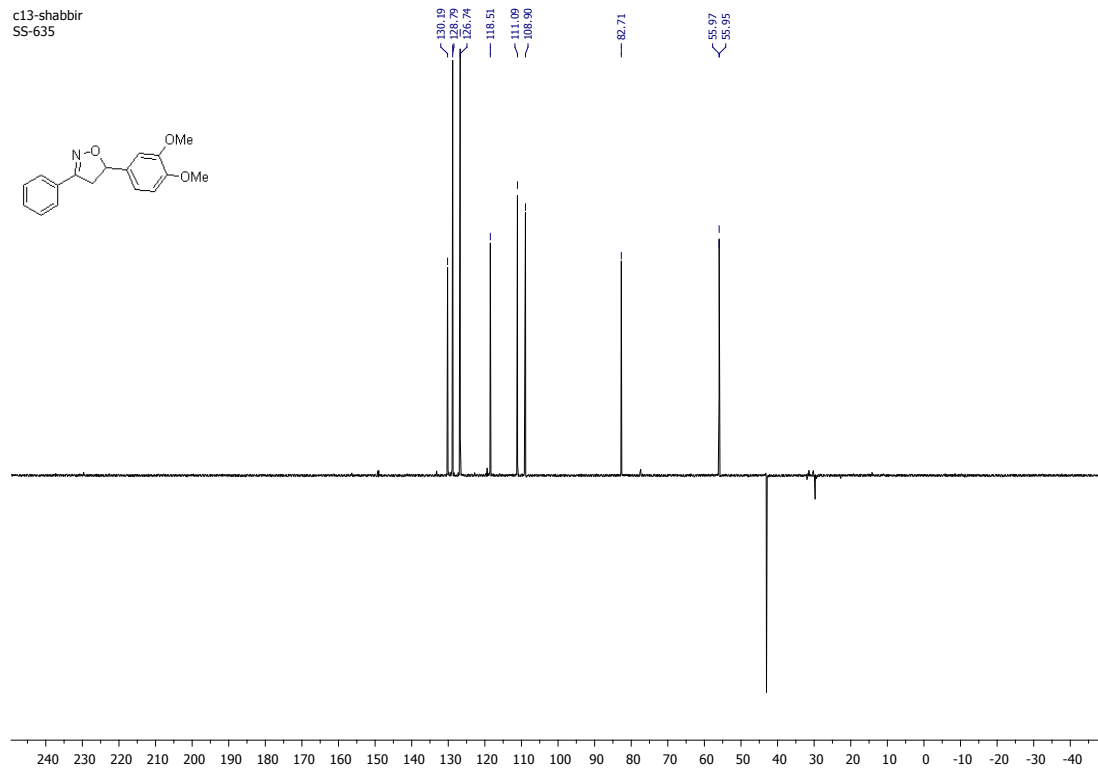

S3.21. <sup>1</sup>H, <sup>13</sup>C and DEPT135 NMR spectra of 5-(3,4-dimethoxyphenyl)-3-(p-tolyl)-4,5-dihydroisoxazole (6i)

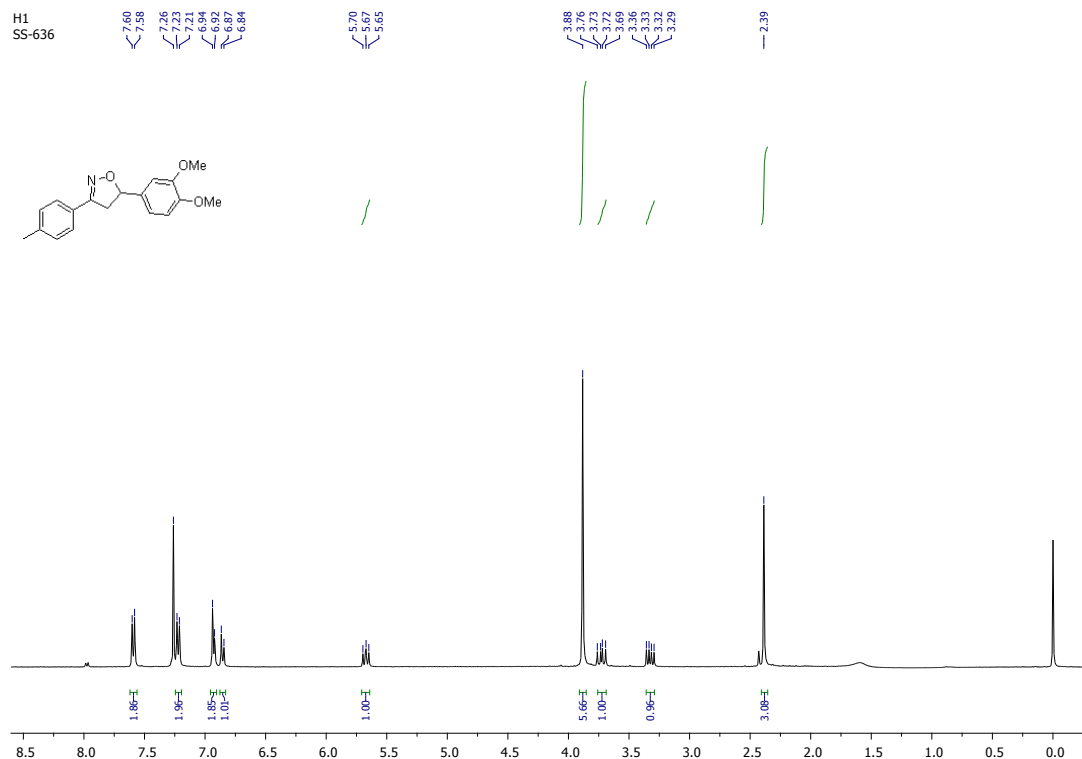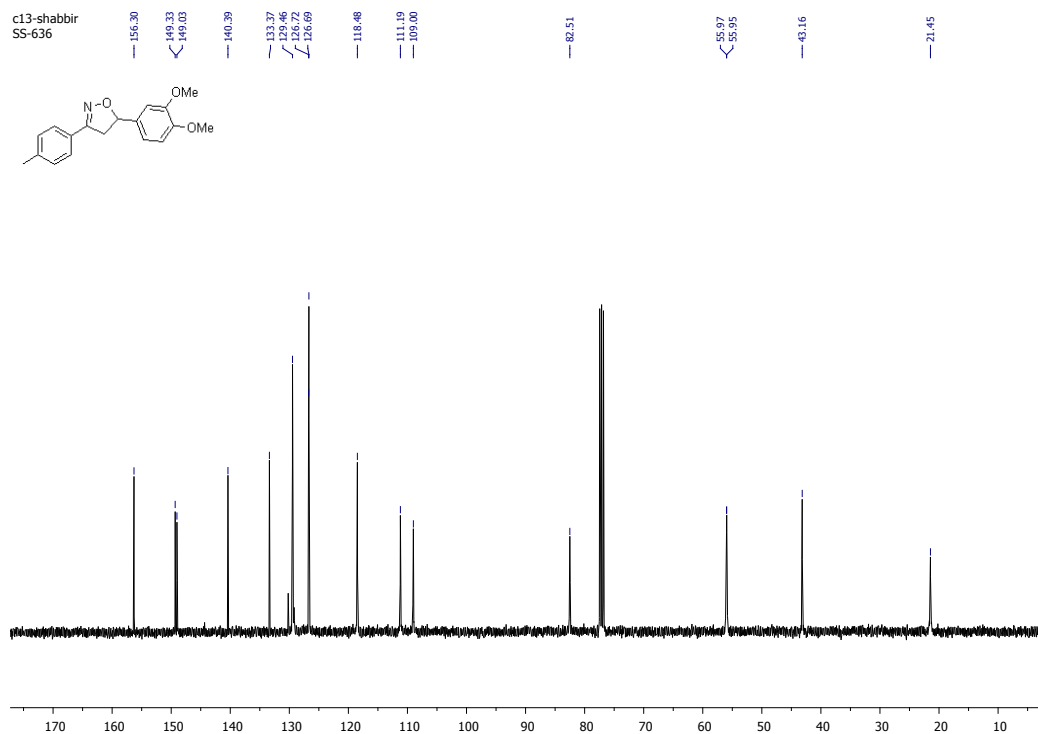



c13-shabbir  
SS-636

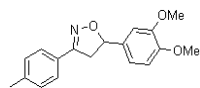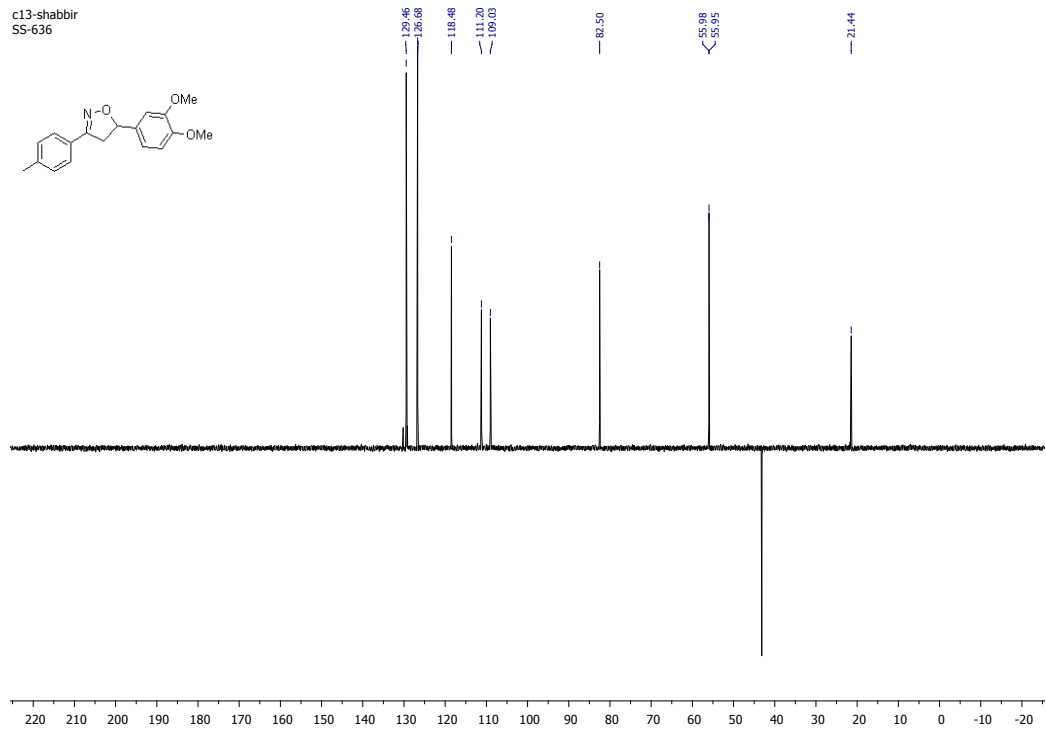

S3.22.  $^1\text{H}$ ,  $^{13}\text{C}$  and DEPT135 NMR spectra of 5-(4-fluorophenyl)-3-(4-methoxyphenyl)-4, 5-dihydroisoxazole (6j)

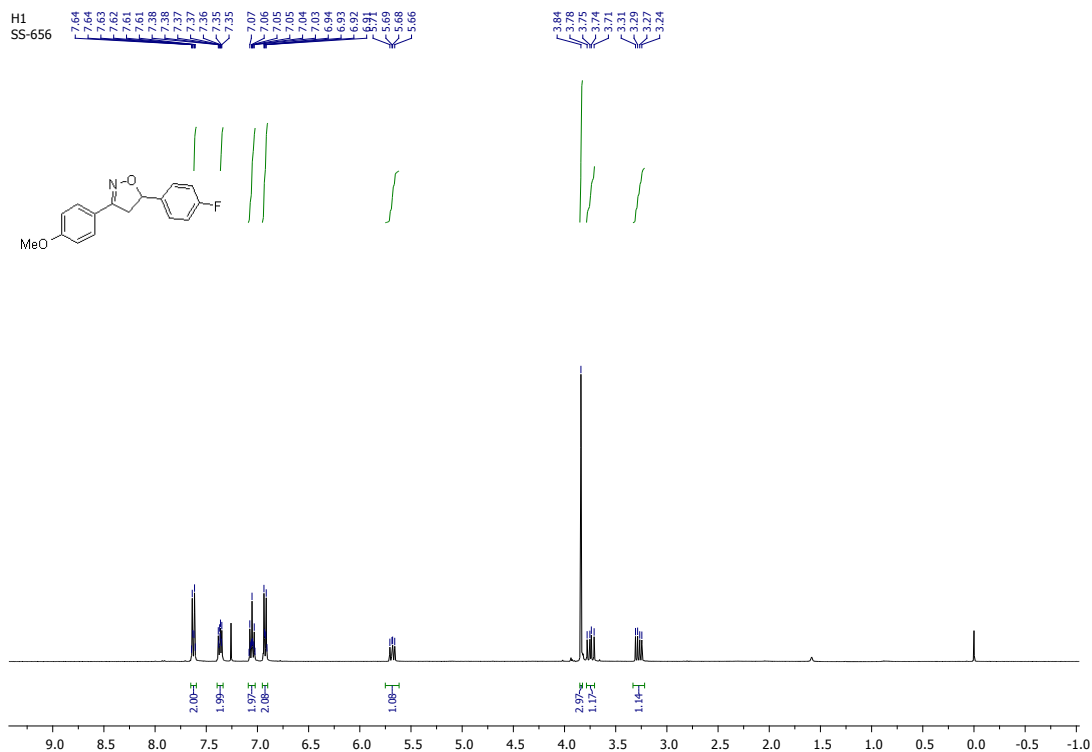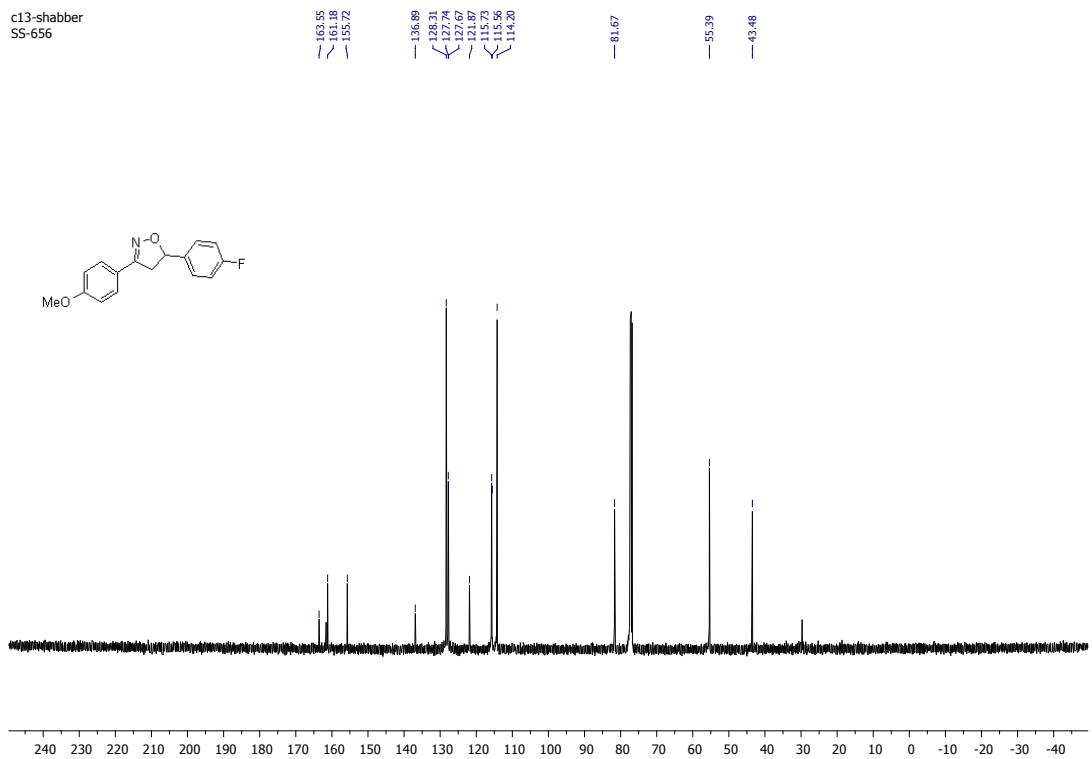

c13-shabber  
SS-656

128.31  
127.74  
127.67

115.73  
115.56  
114.20

81.67

55.39

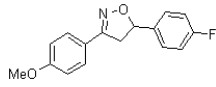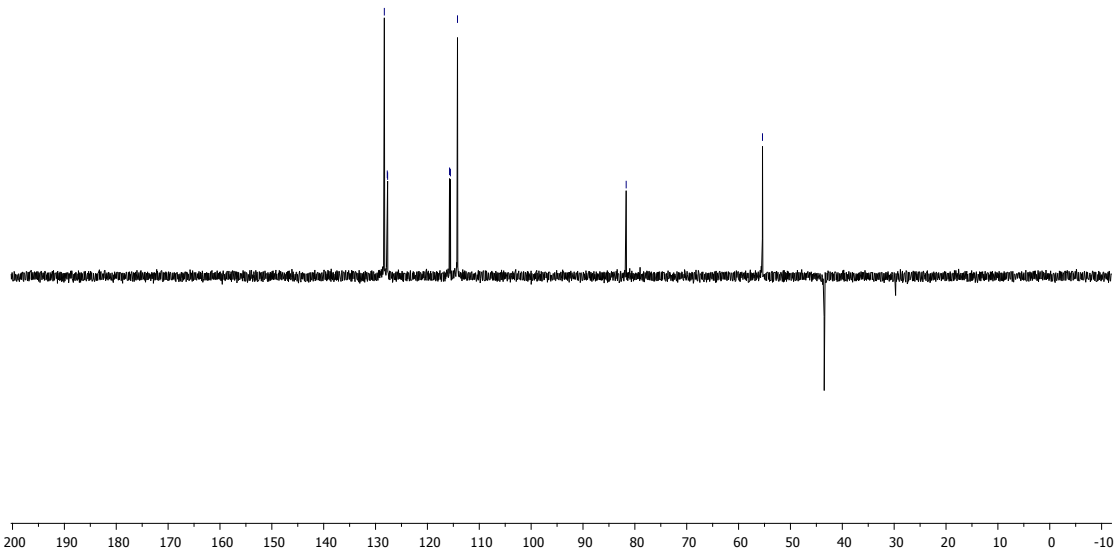

S3.23.  $^1\text{H}$ ,  $^{13}\text{C}$  and DEPT135 NMR spectra of 5-(4-fluorophenyl)-3-phenyl-4,5-dihydroisoxazole (**6k**)

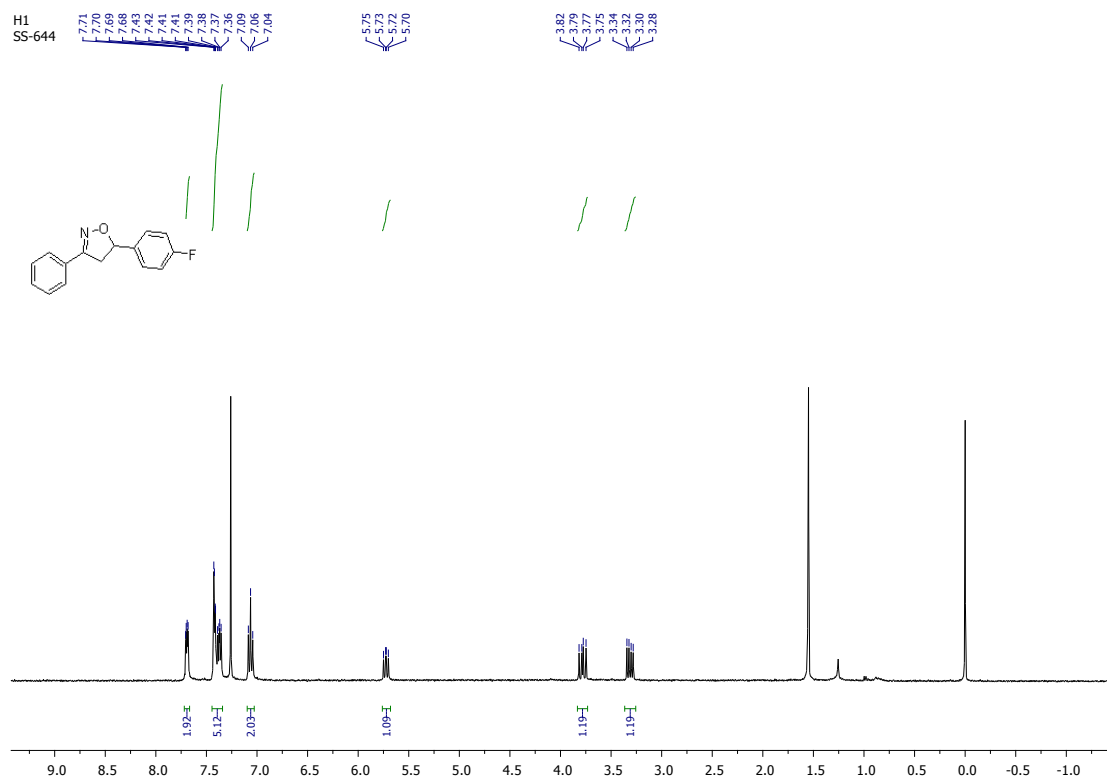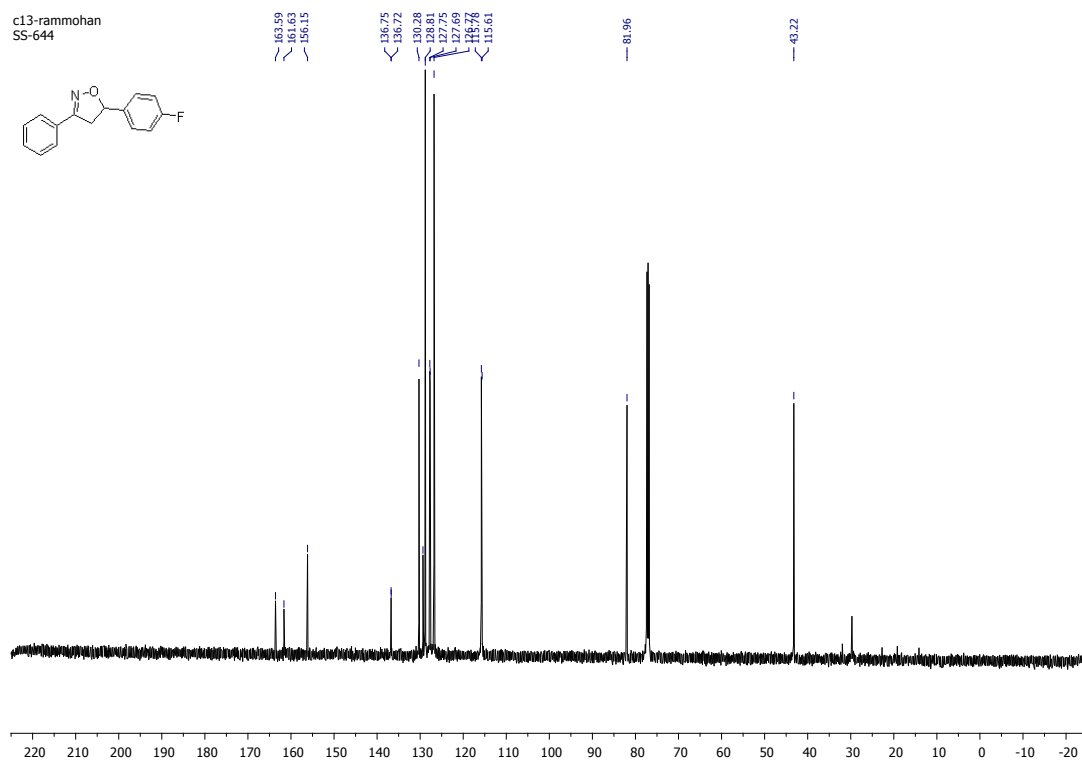

c13-rammohan  
SS-644

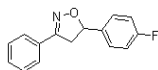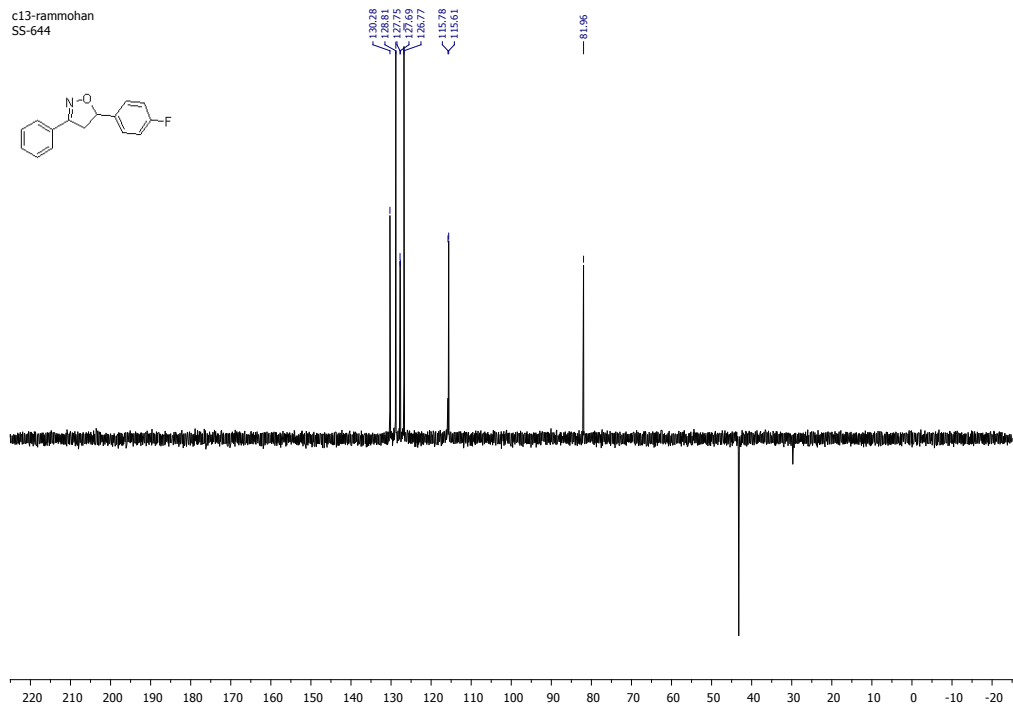

S3.24.  $^1\text{H}$ ,  $^{13}\text{C}$  and DEPT135 NMR spectra of 5-(4-fluorophenyl)-3-(p-tolyl)-4, 5-dihydroisoxazole (**6l**)

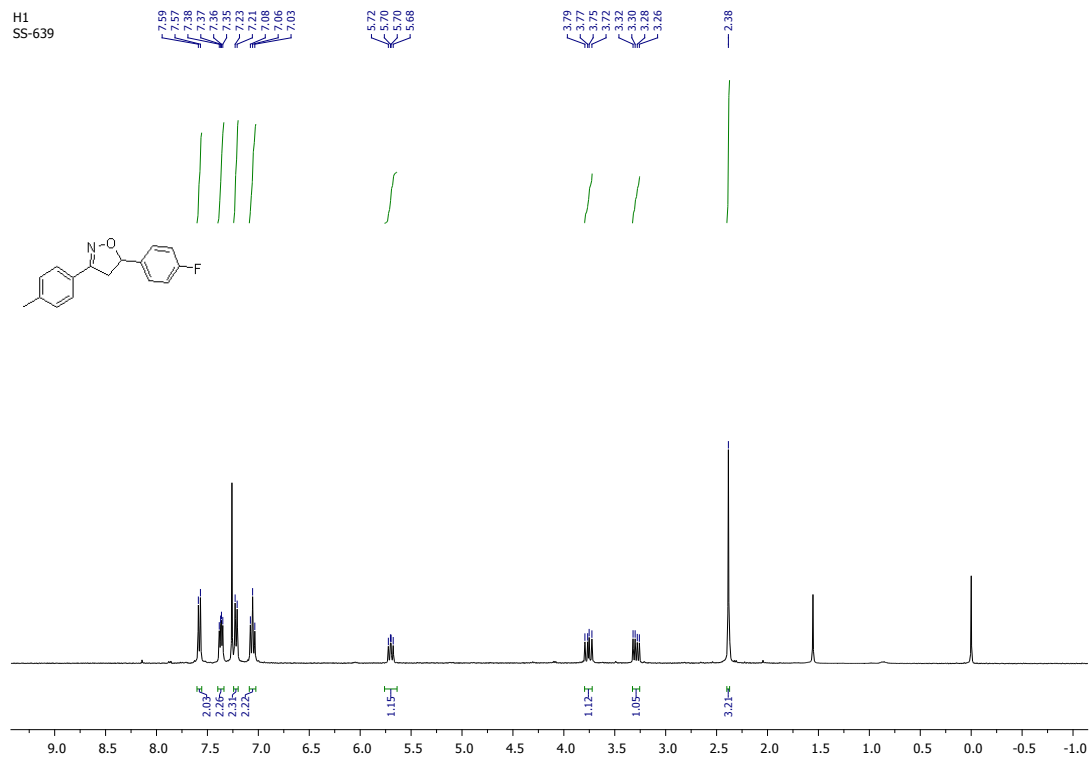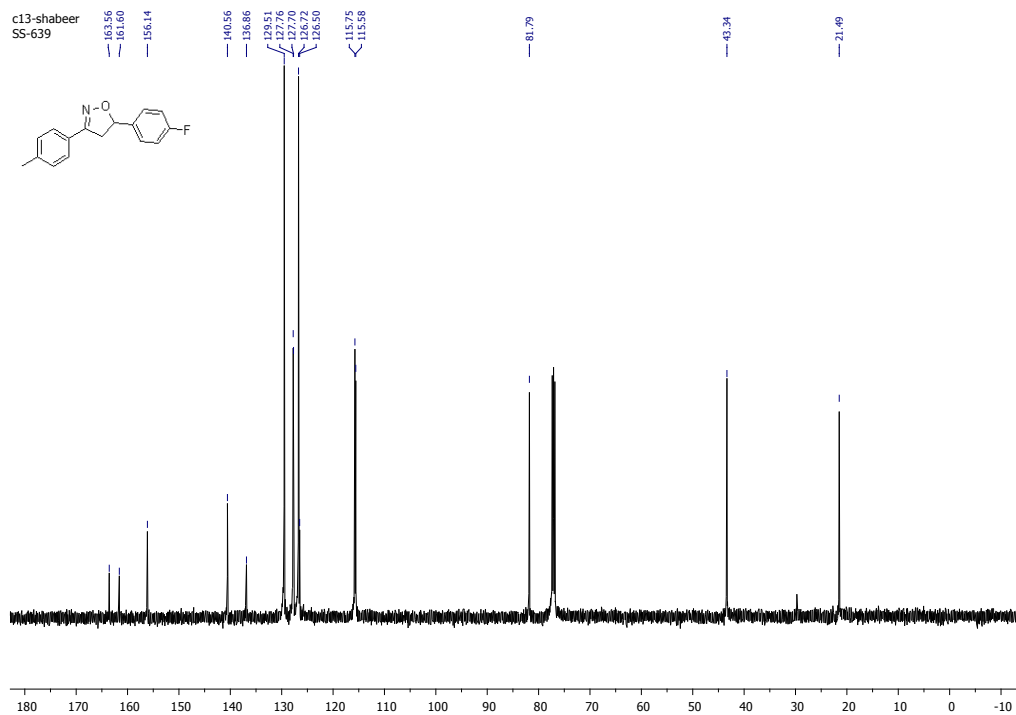

c13-shabeer  
SS-639

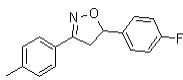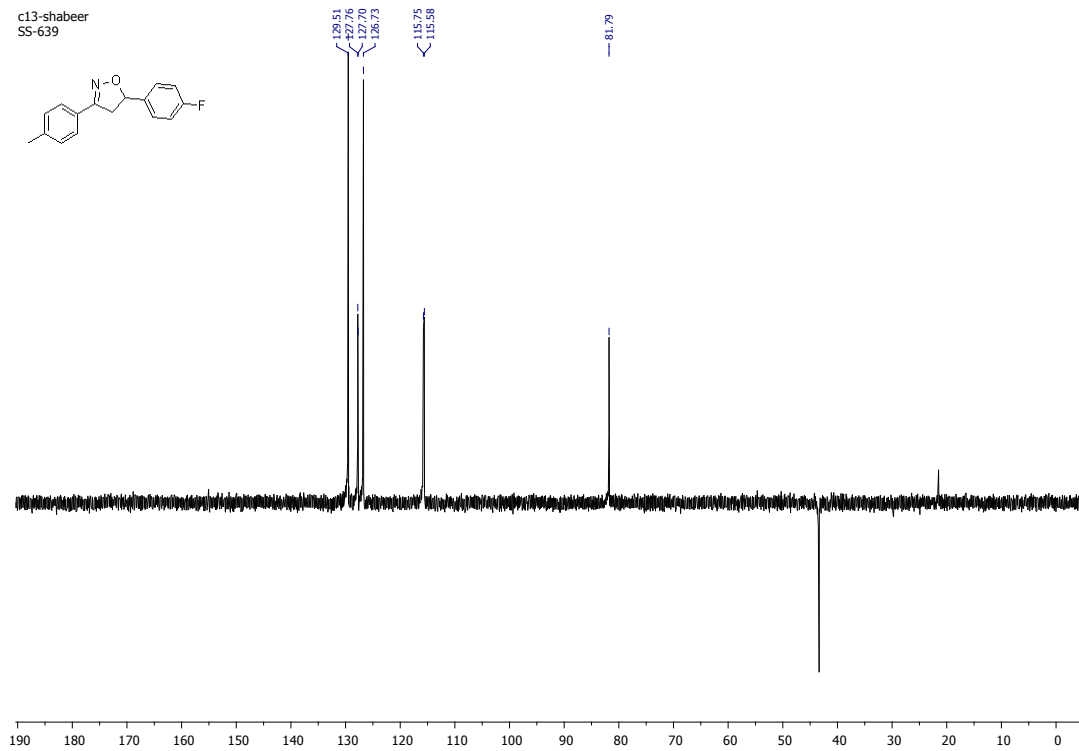

S3.25.  $^1\text{H}$ ,  $^{13}\text{C}$  and DEPT135 NMR spectra of 5-phenyl-3-(pyridine-2-yl)-4, 5-dihydroisoxazole (**6m**)

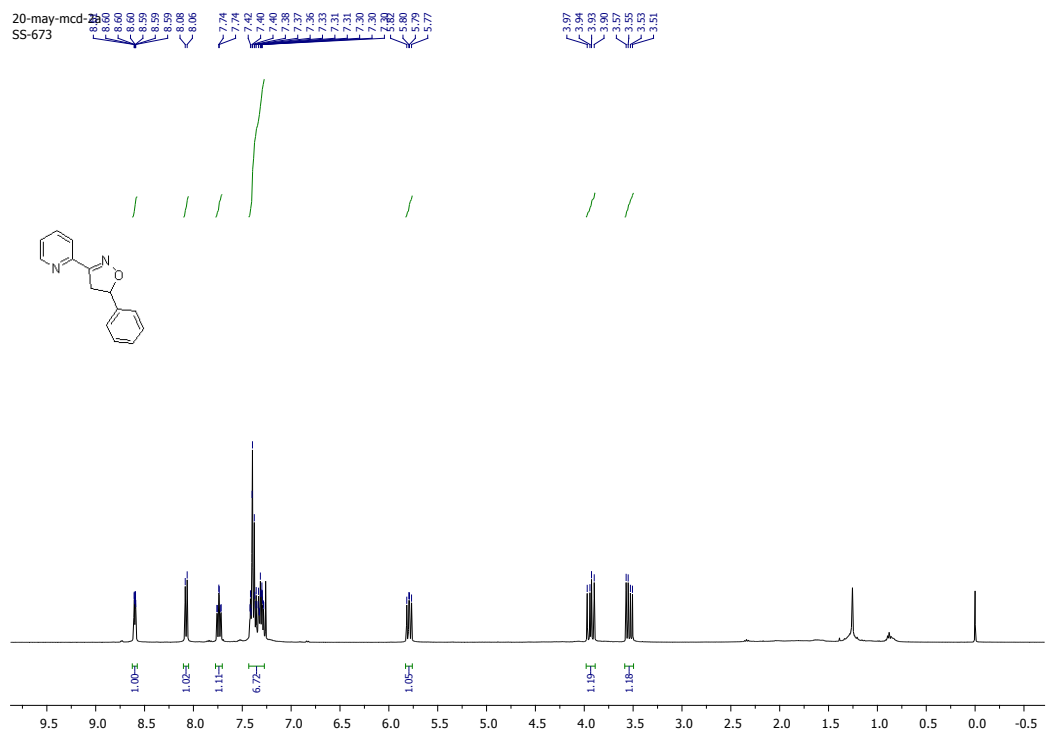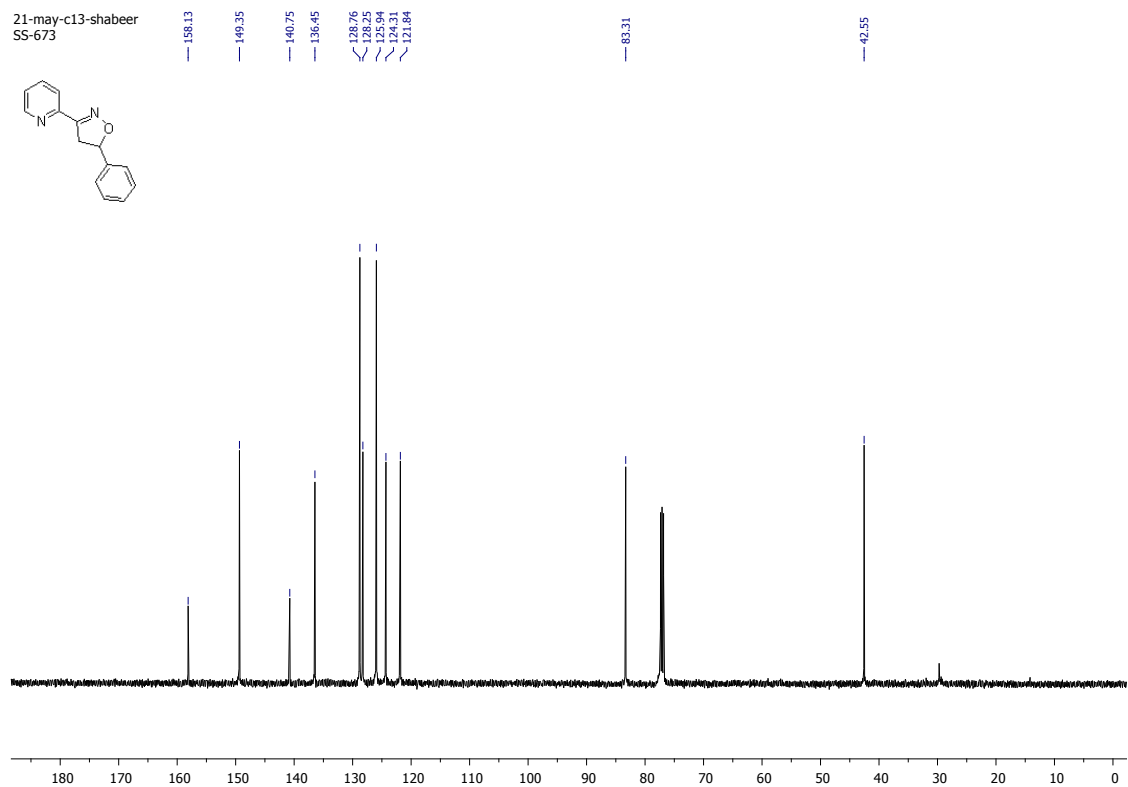



21-may-c13-shabeer  
SS-673

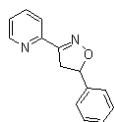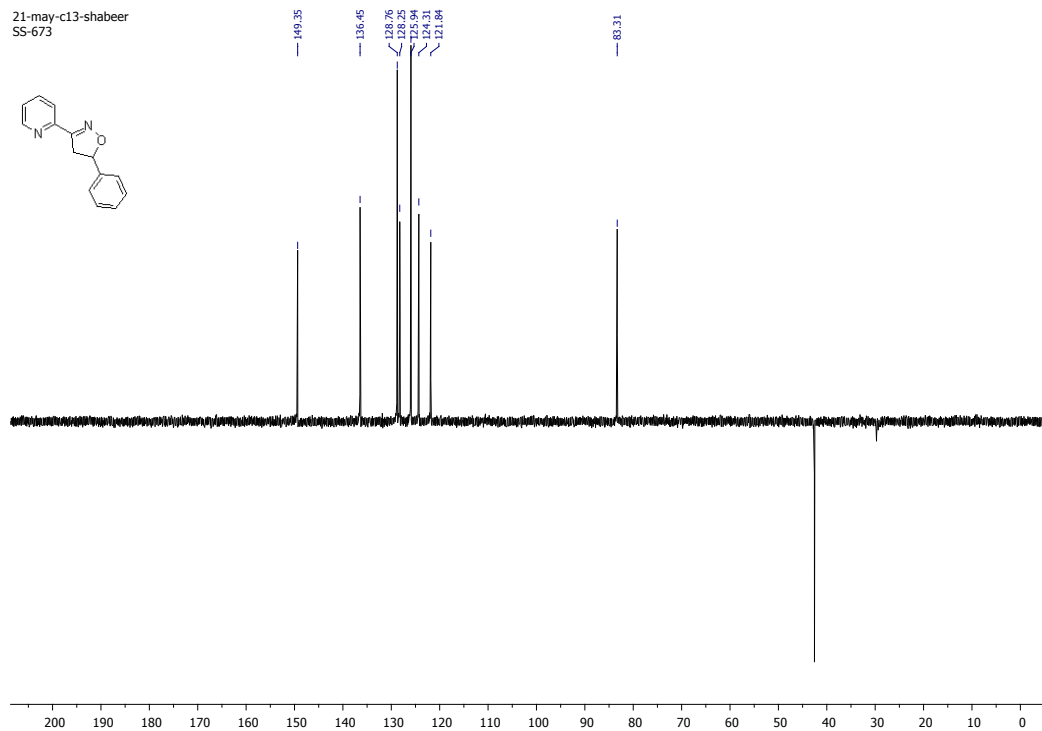

S3.26.  $^1\text{H}$ ,  $^{13}\text{C}$  and DEPT135 NMR spectra of 5-(4-fluorophenyl)-3-(o-tolyl)-4, 5-dihydroisoxazole (**6n**)

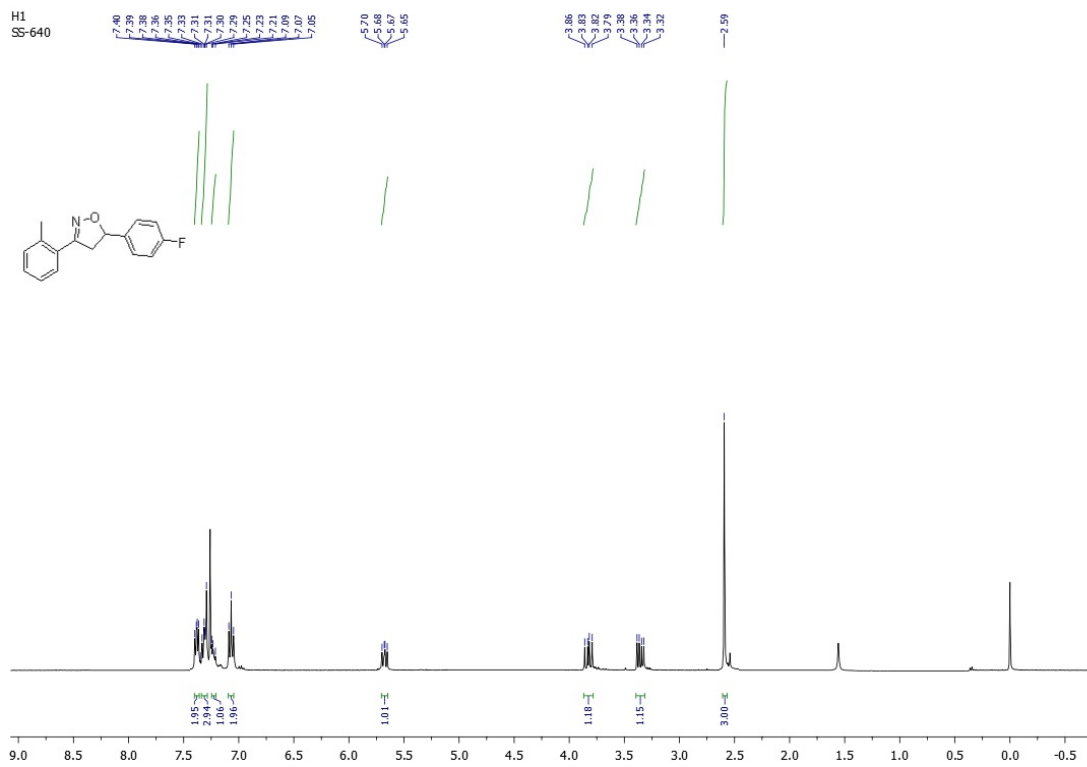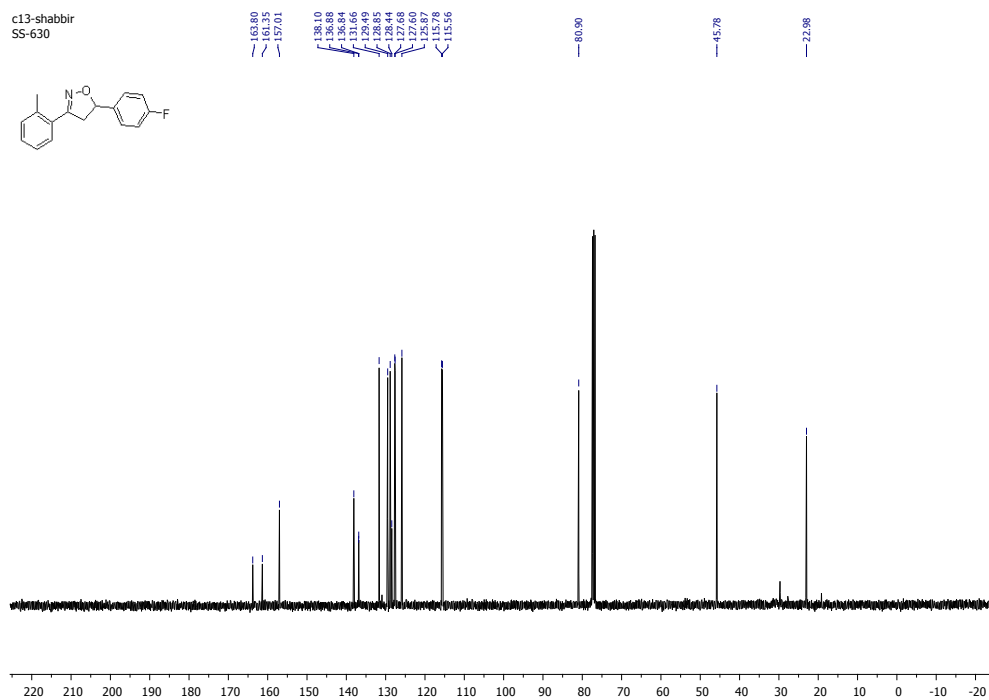

c13-shabbir  
SS-630

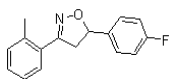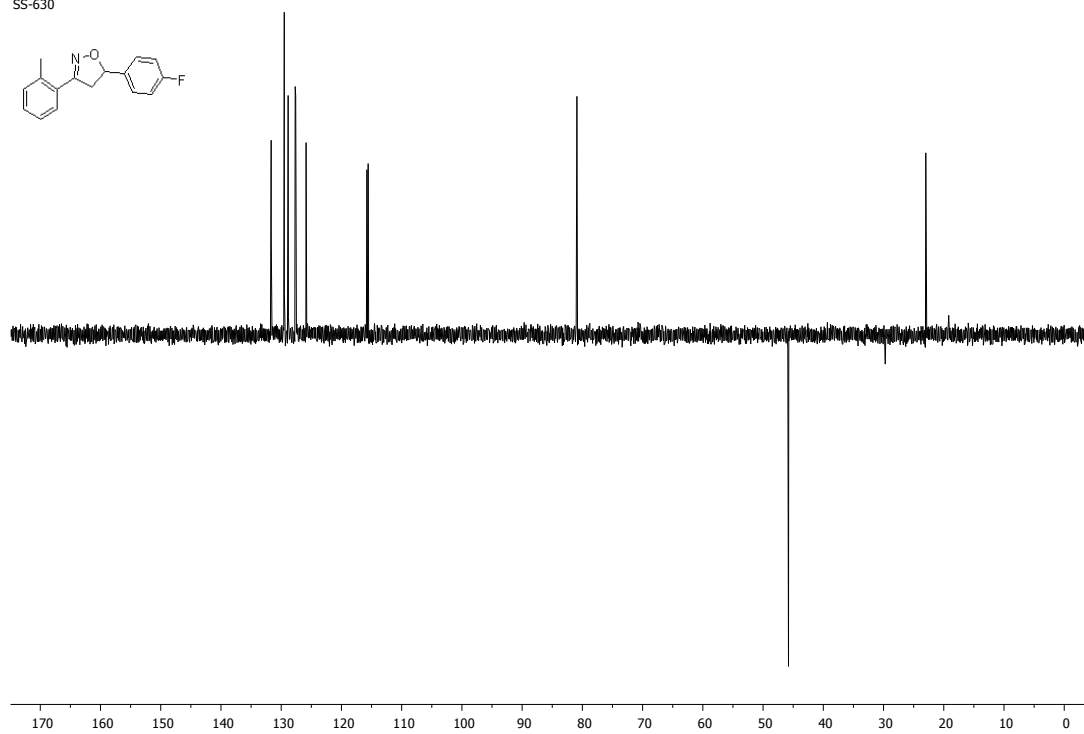

S3.27.  $^1\text{H}$ ,  $^{13}\text{C}$  and DEPT135 NMR spectra of 5-(3, 4-dimethoxyphenyl)-3-(4-methoxyphenyl) isoxazole (60)

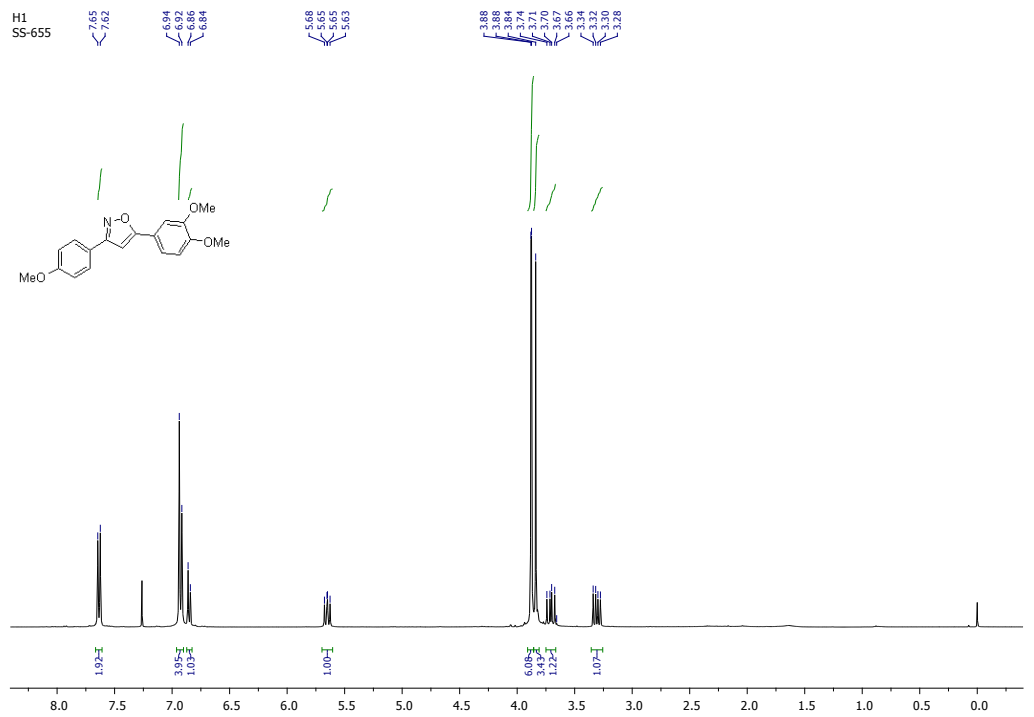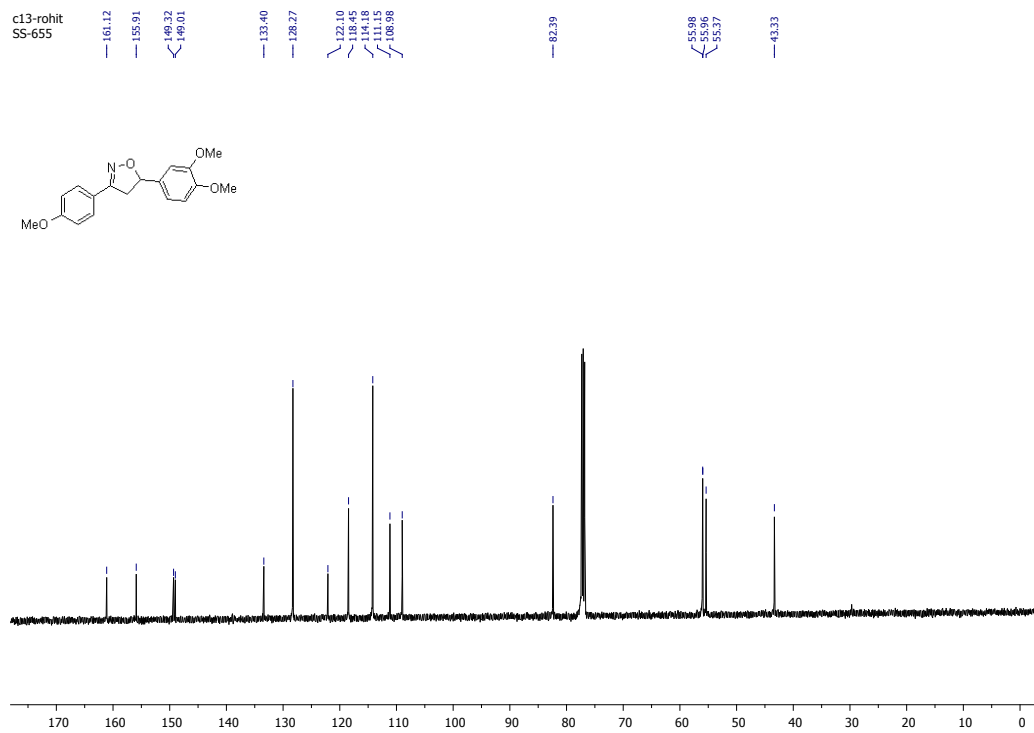

c13-rohit  
SS-655

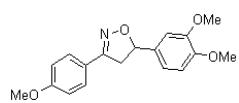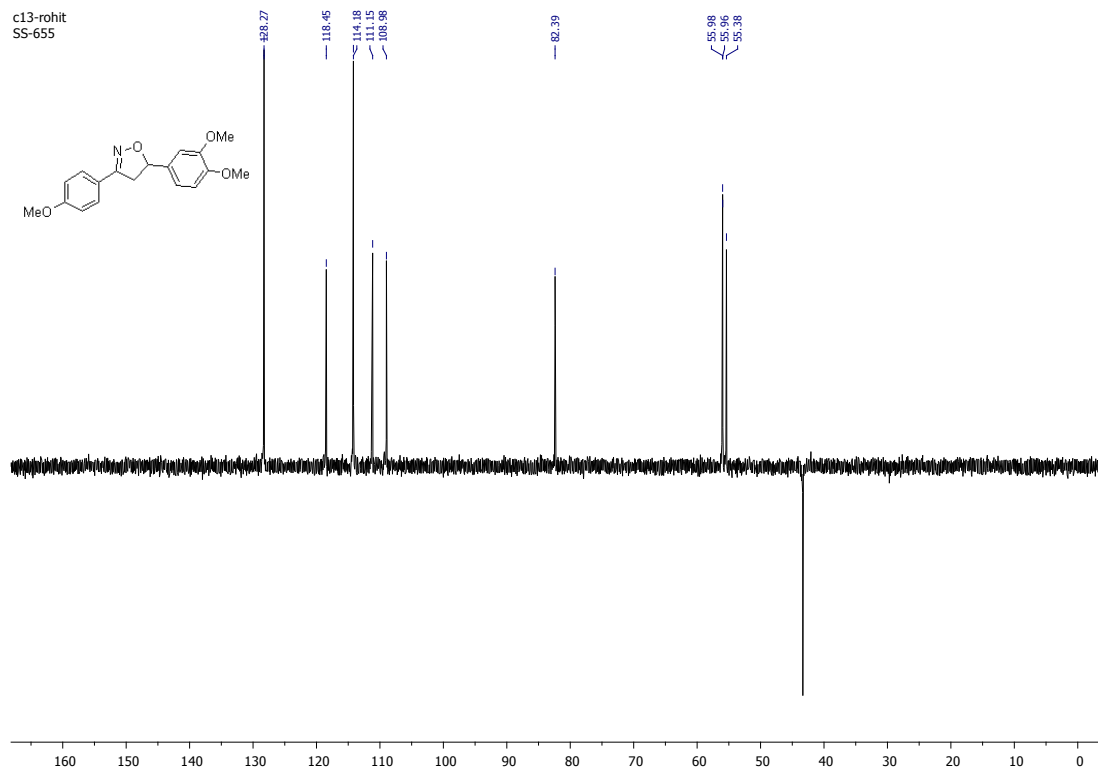

S3.28.  $^1\text{H}$ ,  $^{13}\text{C}$  and DEPT135 NMR spectra of 5-(3, 4-dimethoxyphenyl)-3-(o-tolyl)-4,5-dihydroisoxazole (6p)

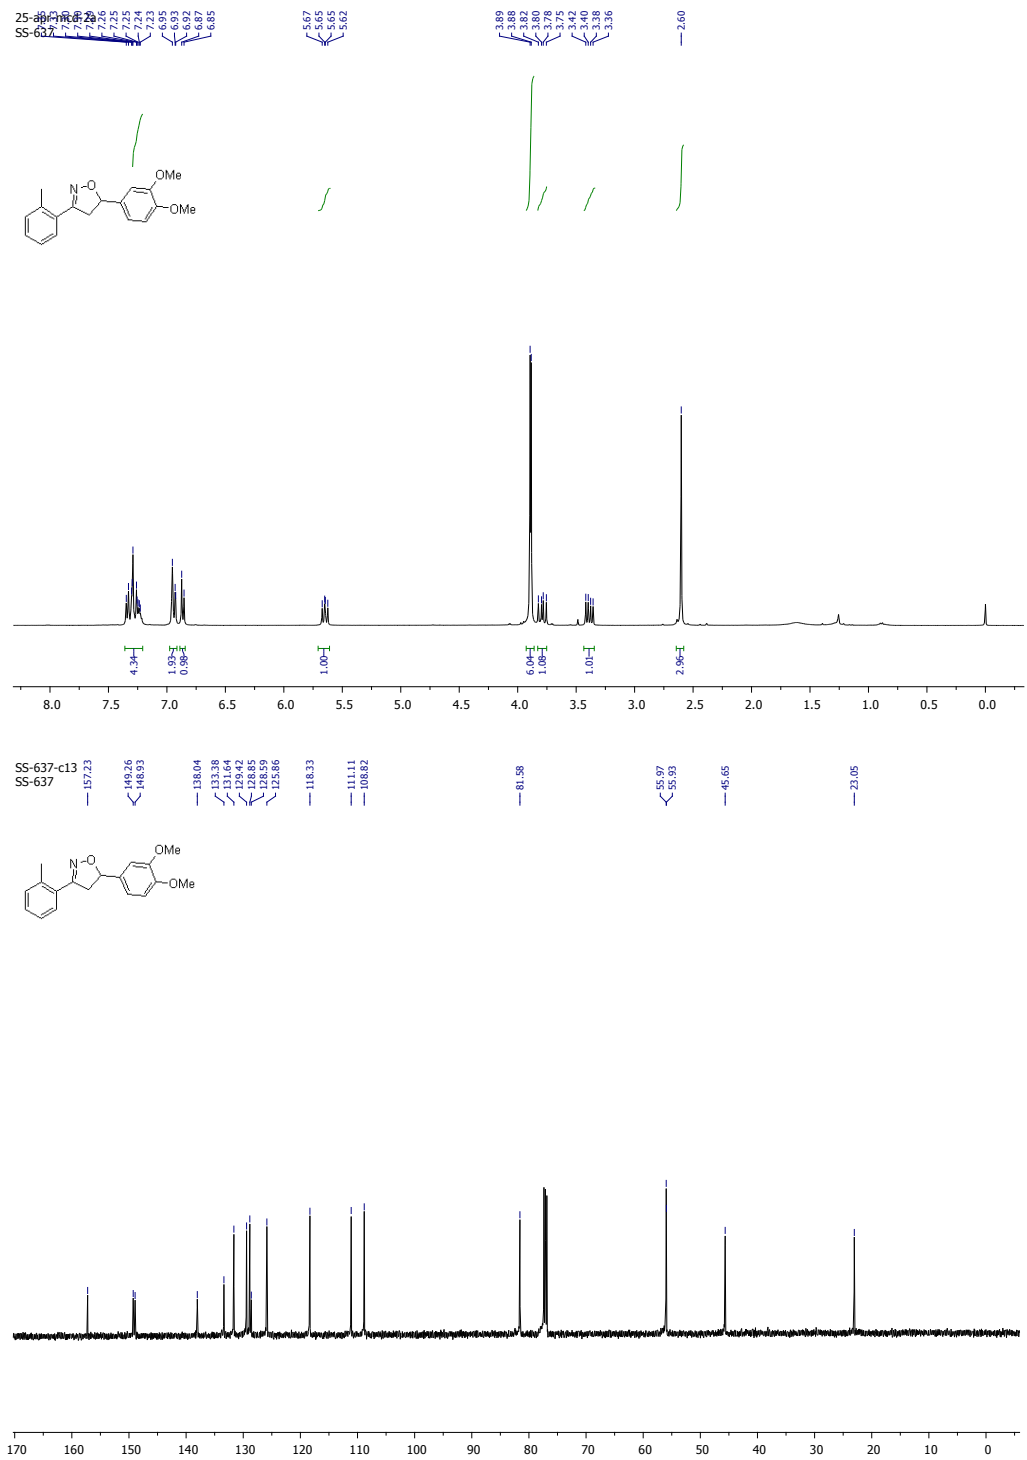

SS-637-c13  
SS-637

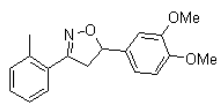

131.64  
128.41  
128.85  
128.86  
118.33  
111.10  
108.81

81.57

55.98  
55.94

23.06

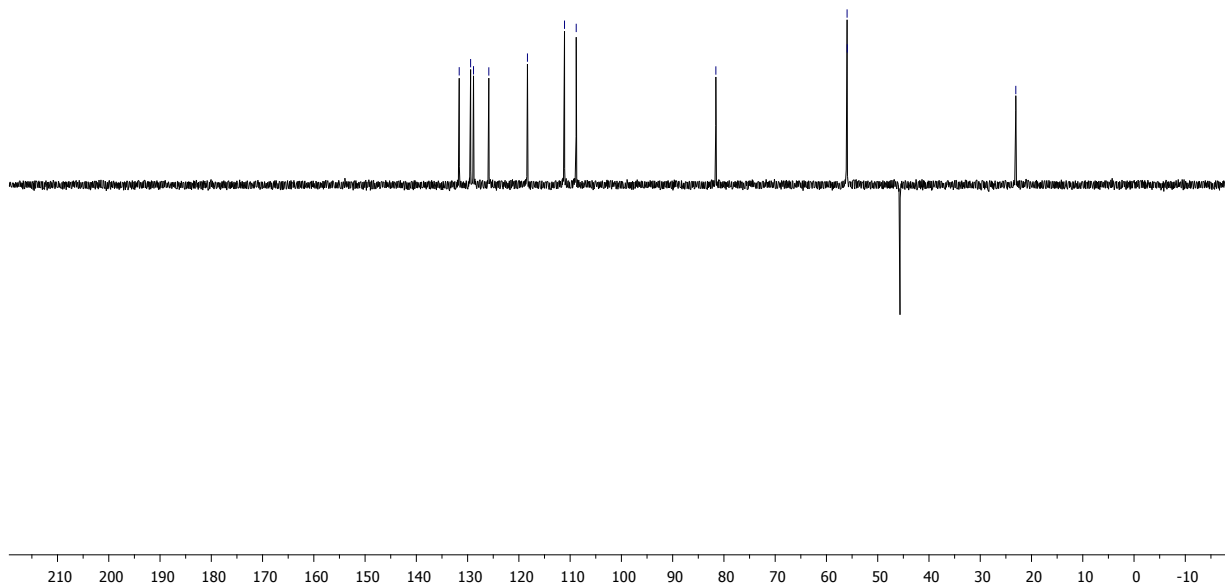

S3.29.  $^1\text{H}$ ,  $^{13}\text{C}$  and DEPT135 NMR spectra of 3-(1H-indol-3-yl)-5-phenyl-4, 5-dihydroisoxazole (**6q**)

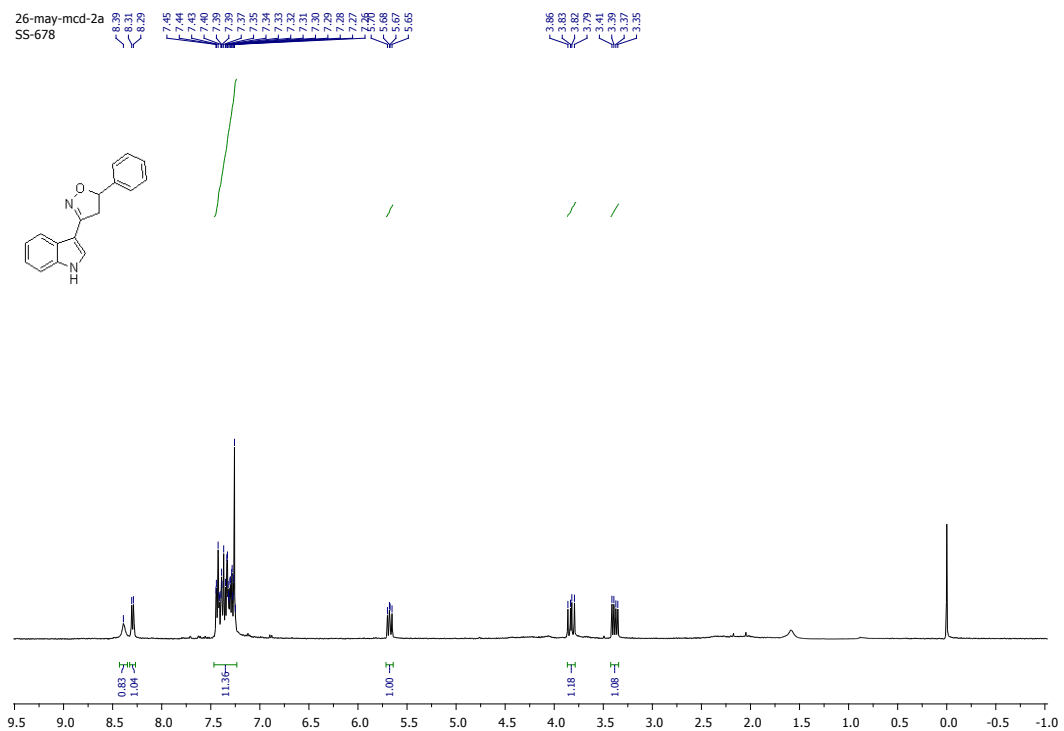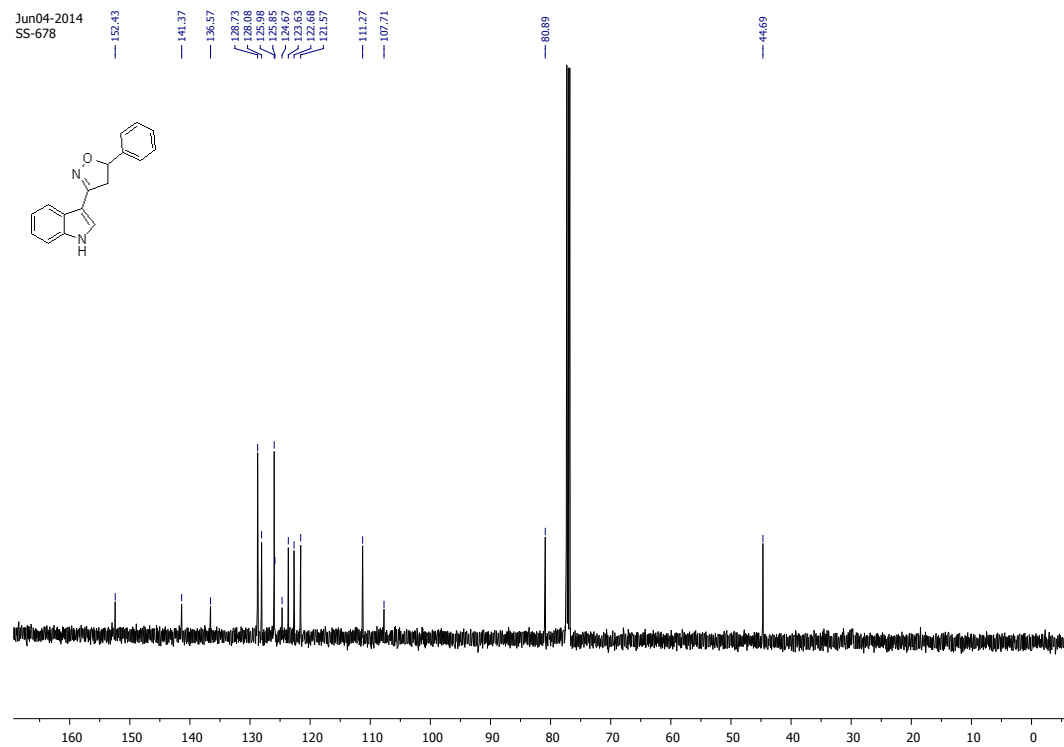



c13-shabeer  
SS-678

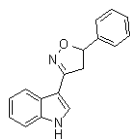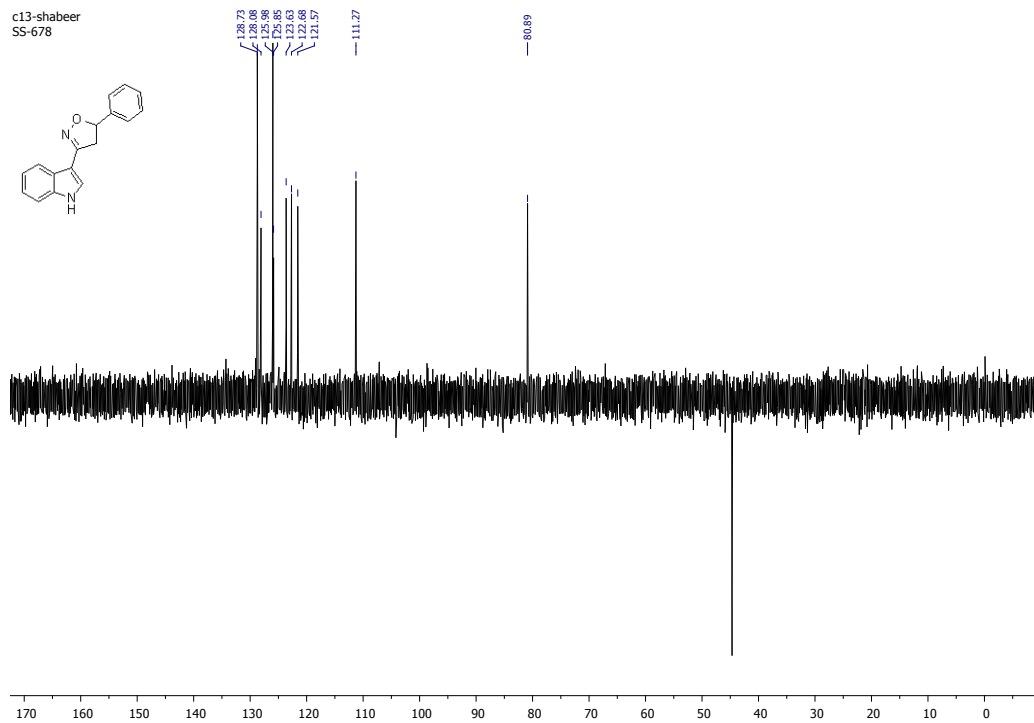

S3.30.  $^1\text{H}$ ,  $^{13}\text{C}$  and DEPT135 NMR spectra of 2-chloro-4-(5-phenylisoxazole-3-yl) phenol (**7a**)

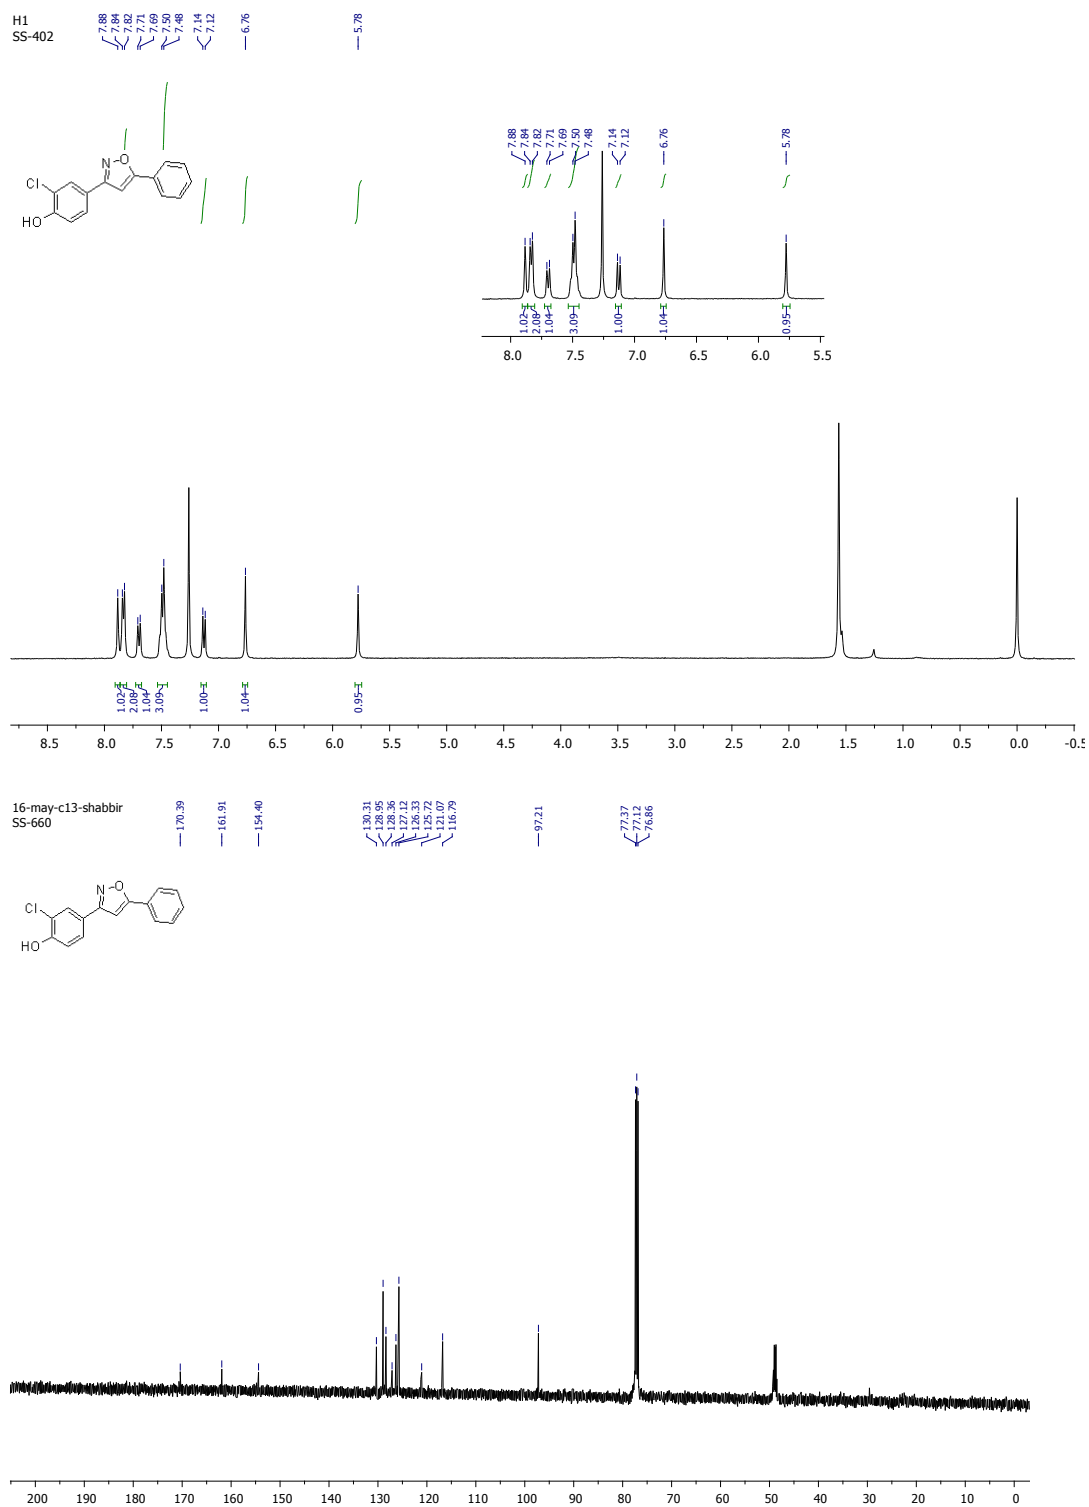

16-may-c13-shabbir  
SS-660

130.30  
128.94  
128.35  
126.31  
125.70  
116.77  
97.20

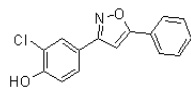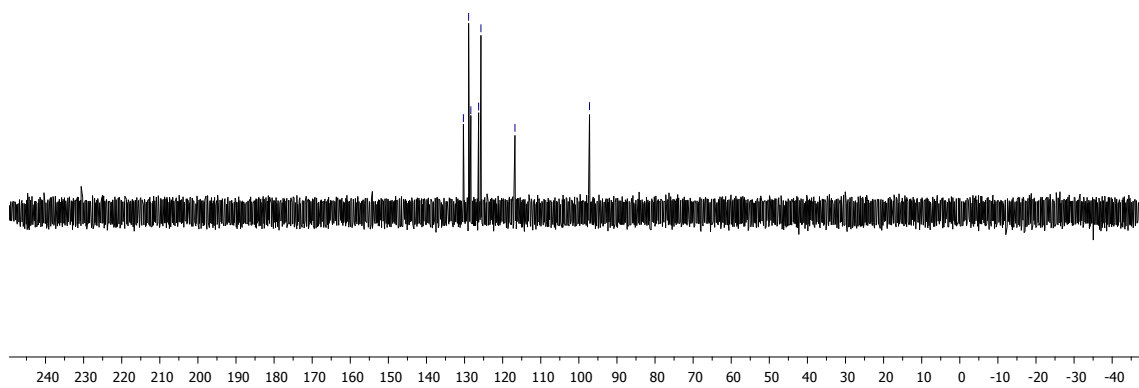

S3.31.  $^1\text{H}$ ,  $^{13}\text{C}$  and DEPT135 NMR spectra of 2-chloro-4-(5-(p-tolyl) isoxazole-3-yl)phenol (**7b**)

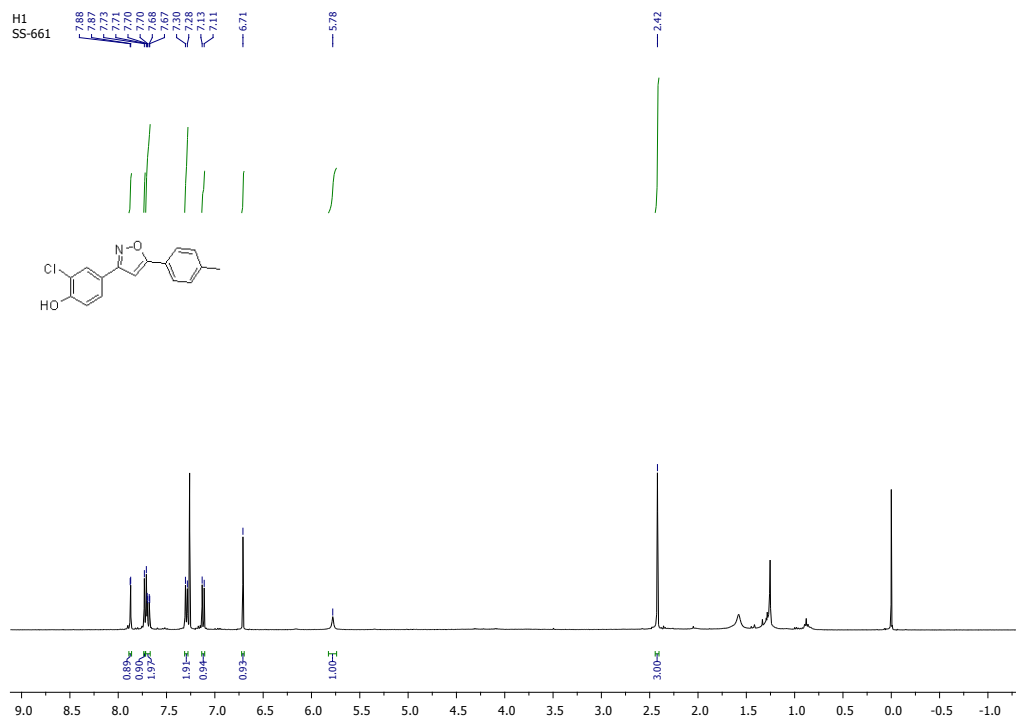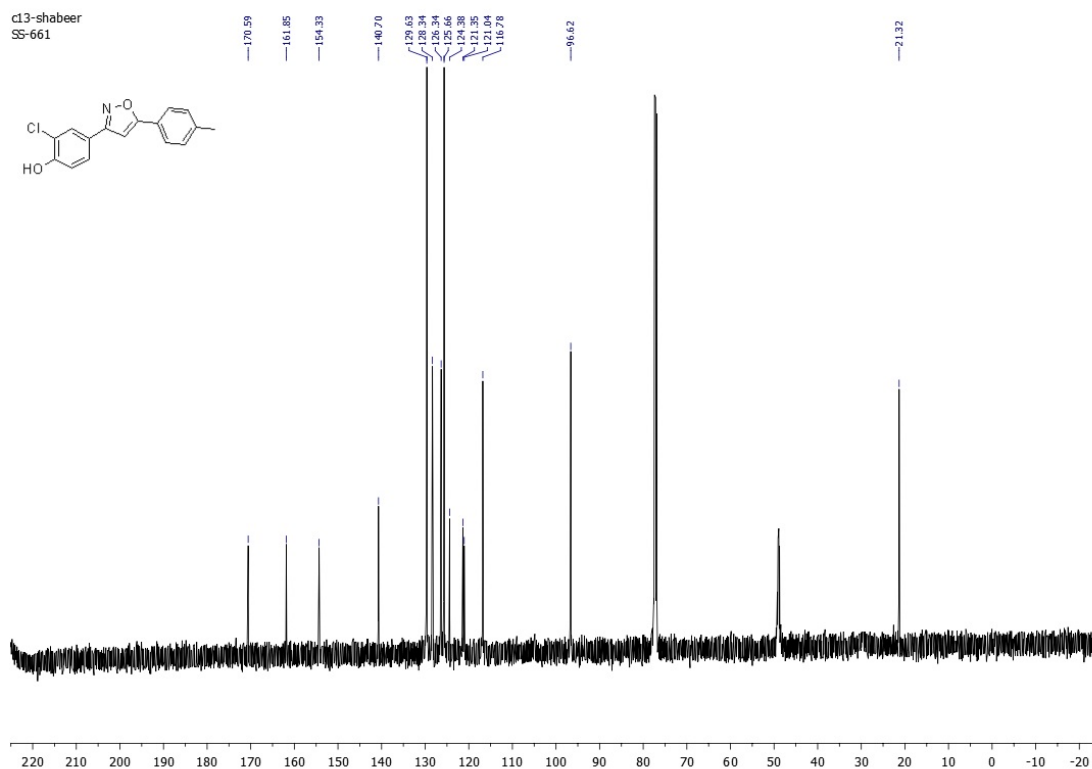

c13-shabeer  
SS-661

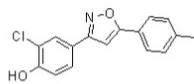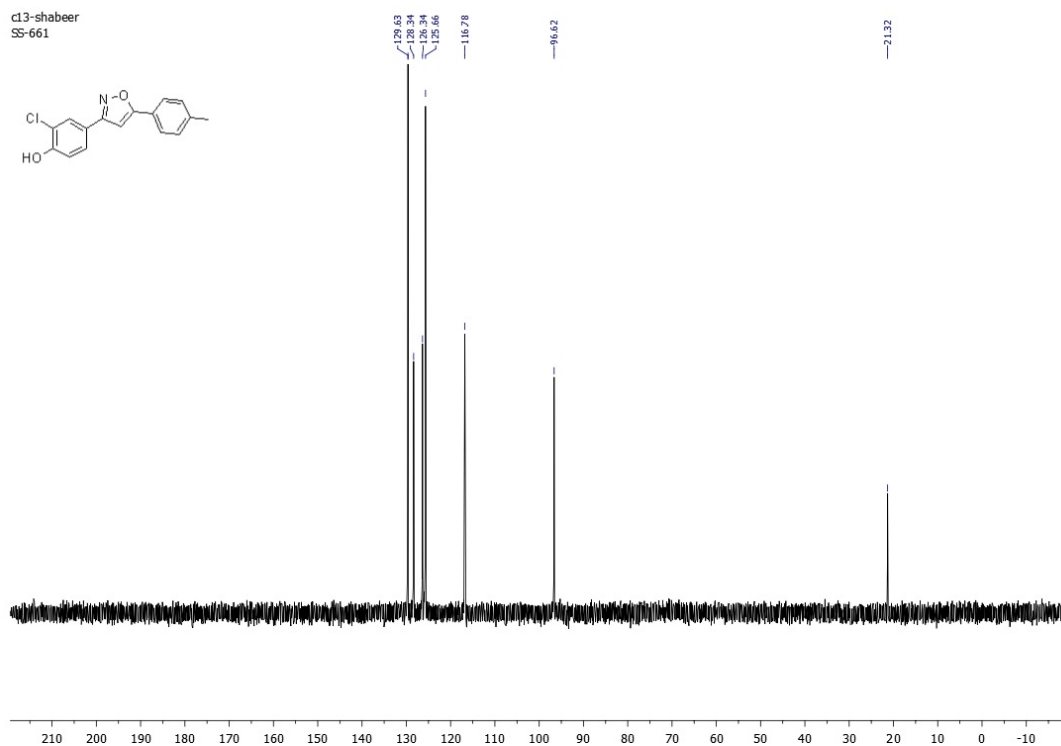

S3.32.  $^1\text{H}$ ,  $^{13}\text{C}$  and DEPT135 NMR spectra of 2-chloro-4-(5-(4-ethylphenyl) isoxazole-3-yl) phenol (**7c**)

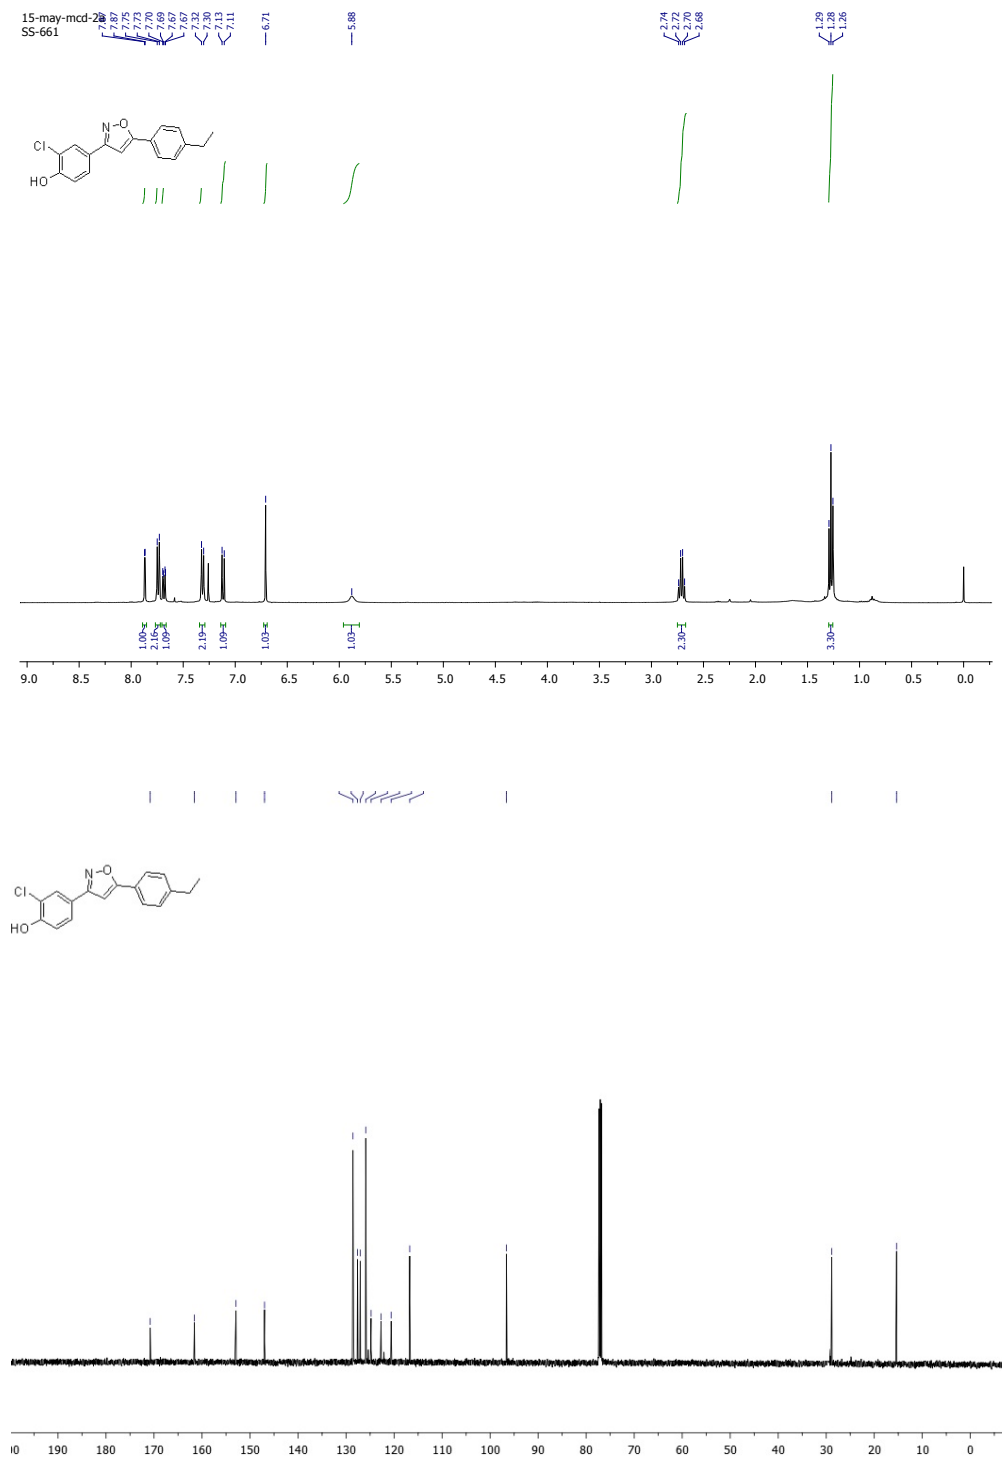

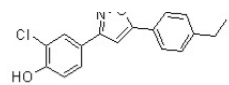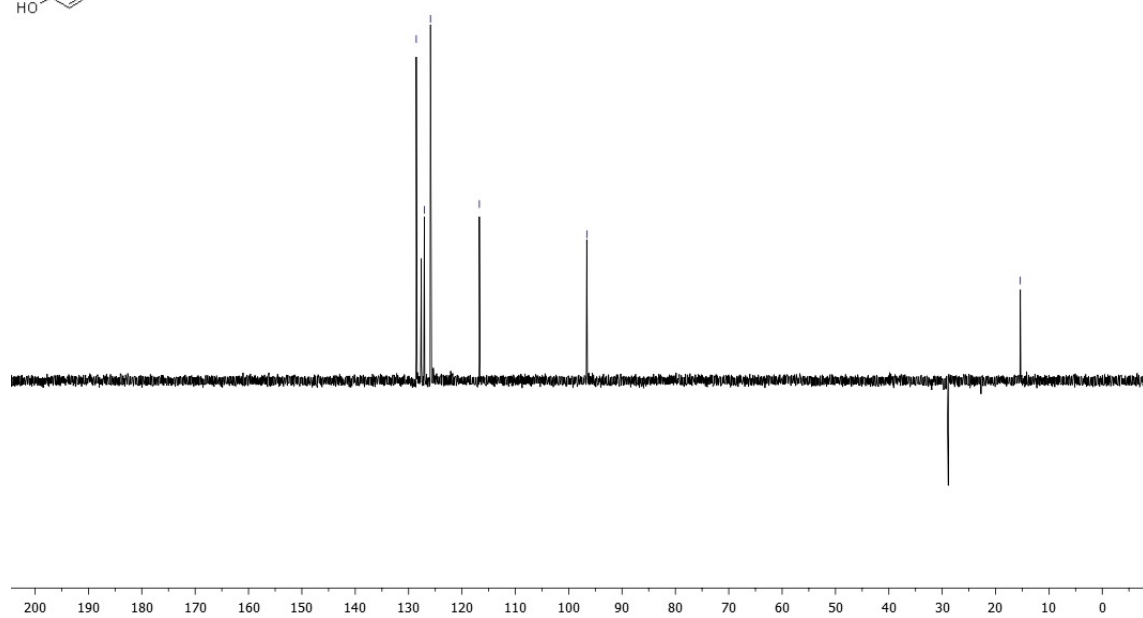

S3.33.  $^1\text{H}$ ,  $^{13}\text{C}$  and DEPT135 NMR spectra of 2-chloro-4-(5-phenylisoxazol-3-yl) phenol (**7d**)

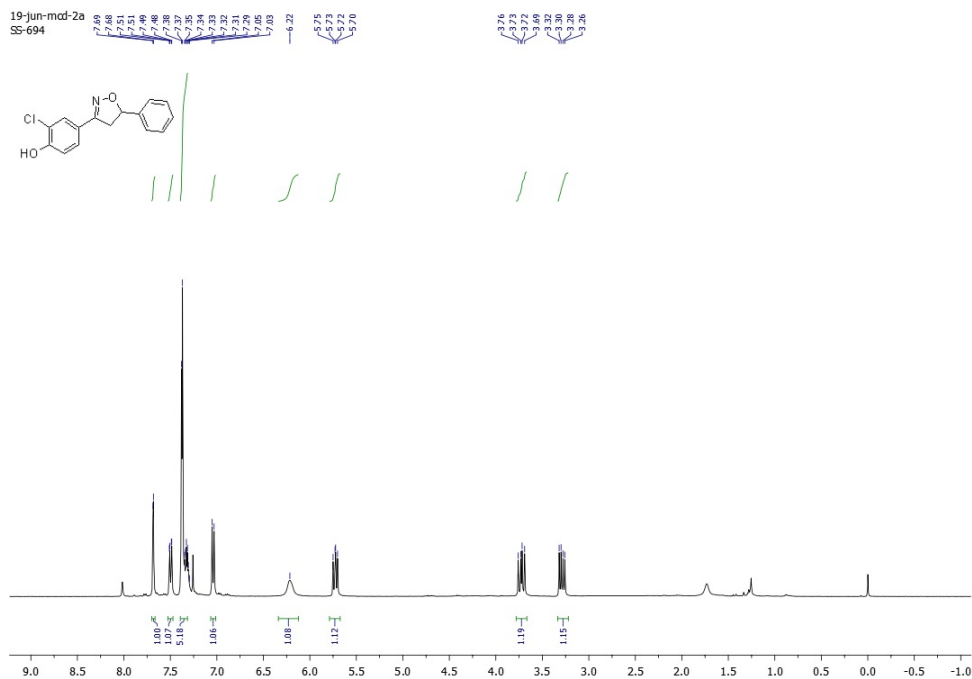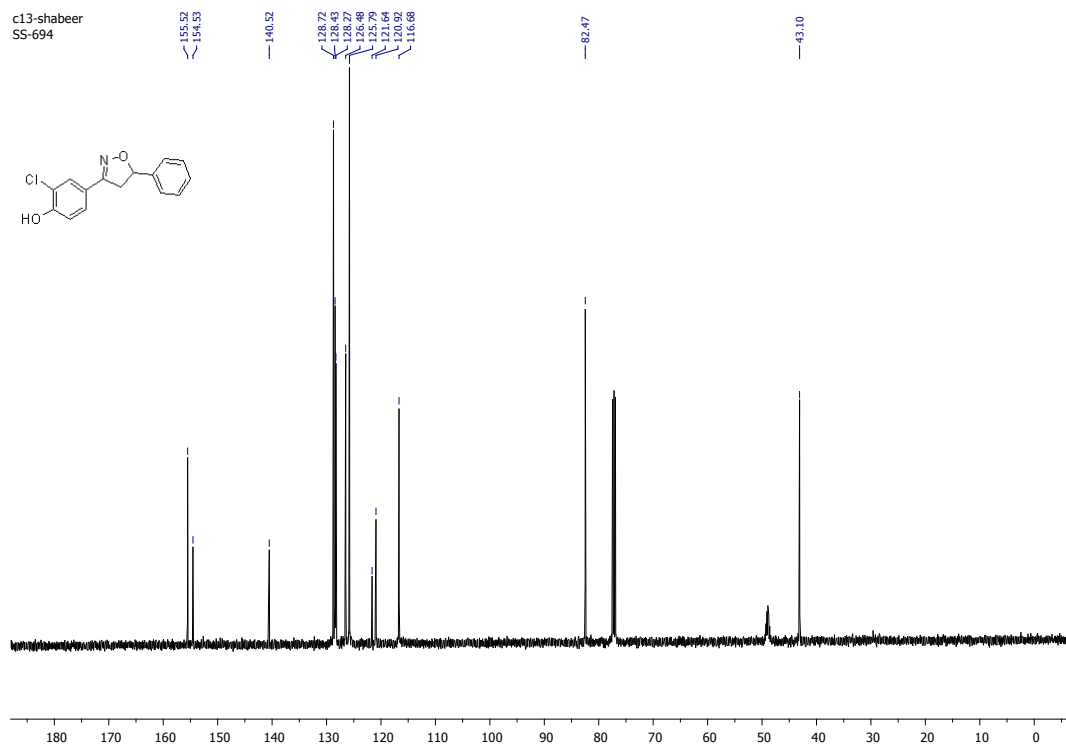



c13-shabeer  
SS-694

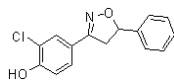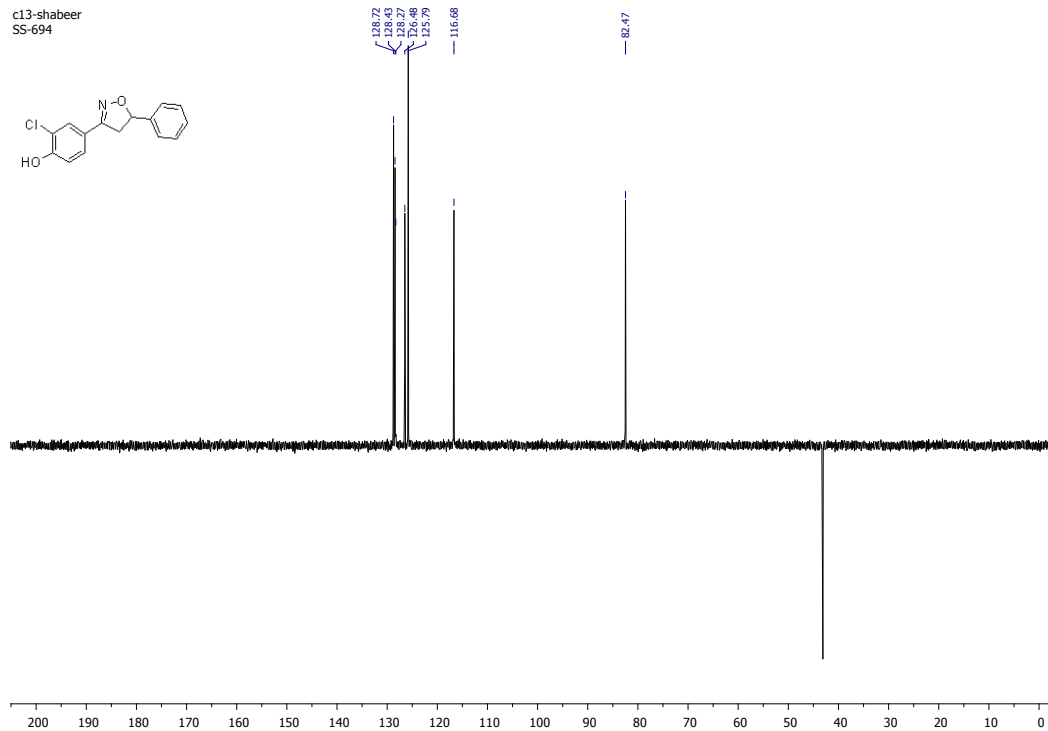

S3. 34.  $^1\text{H}$ ,  $^{13}\text{C}$  and DEPT135 NMR spectra of 2-chloro-4-(5-(4-fluorophenyl)-4,5-dihydroisoxazole-3yl)phenol (**7e**)

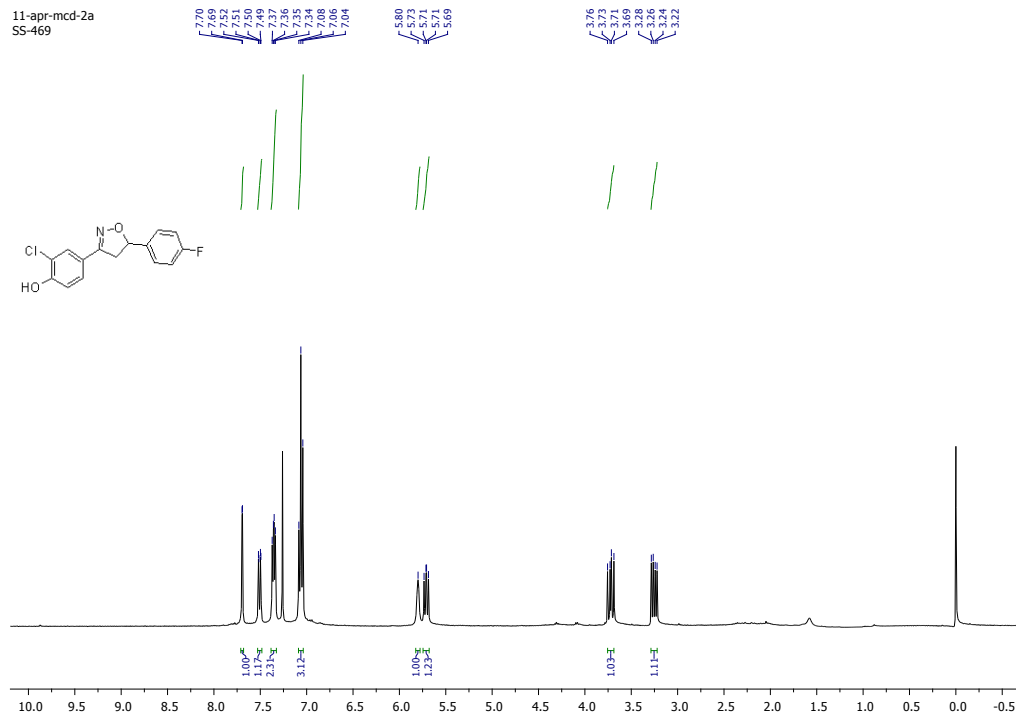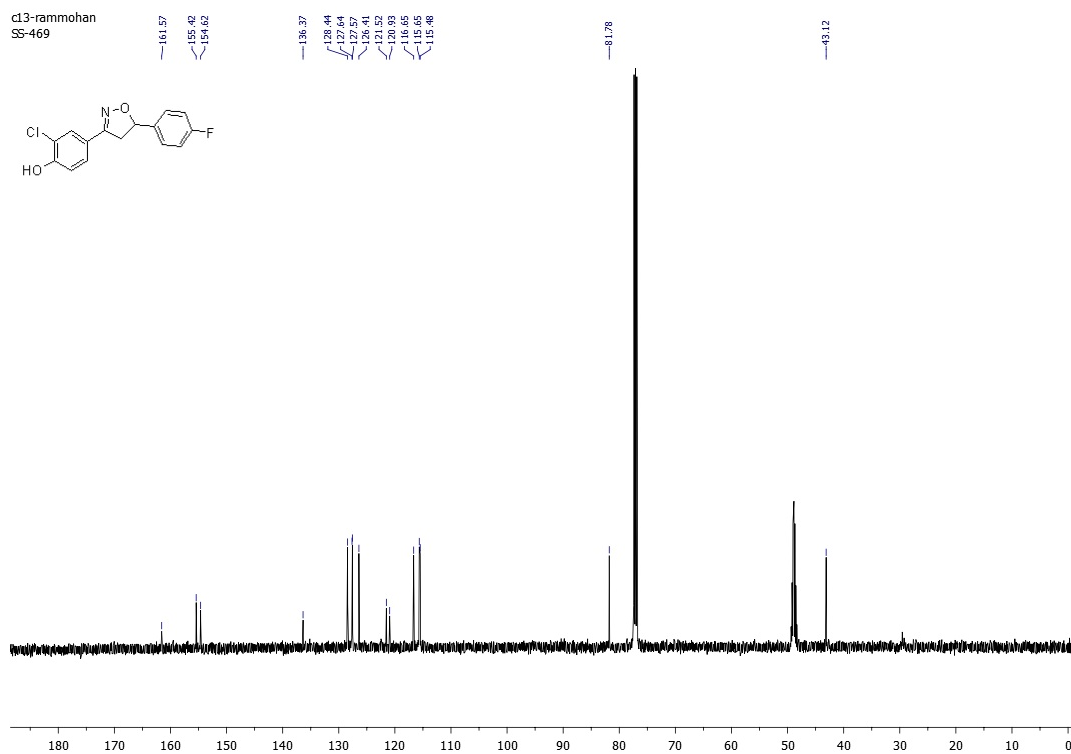

c13-rammohan  
SS-469

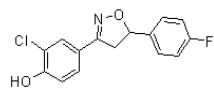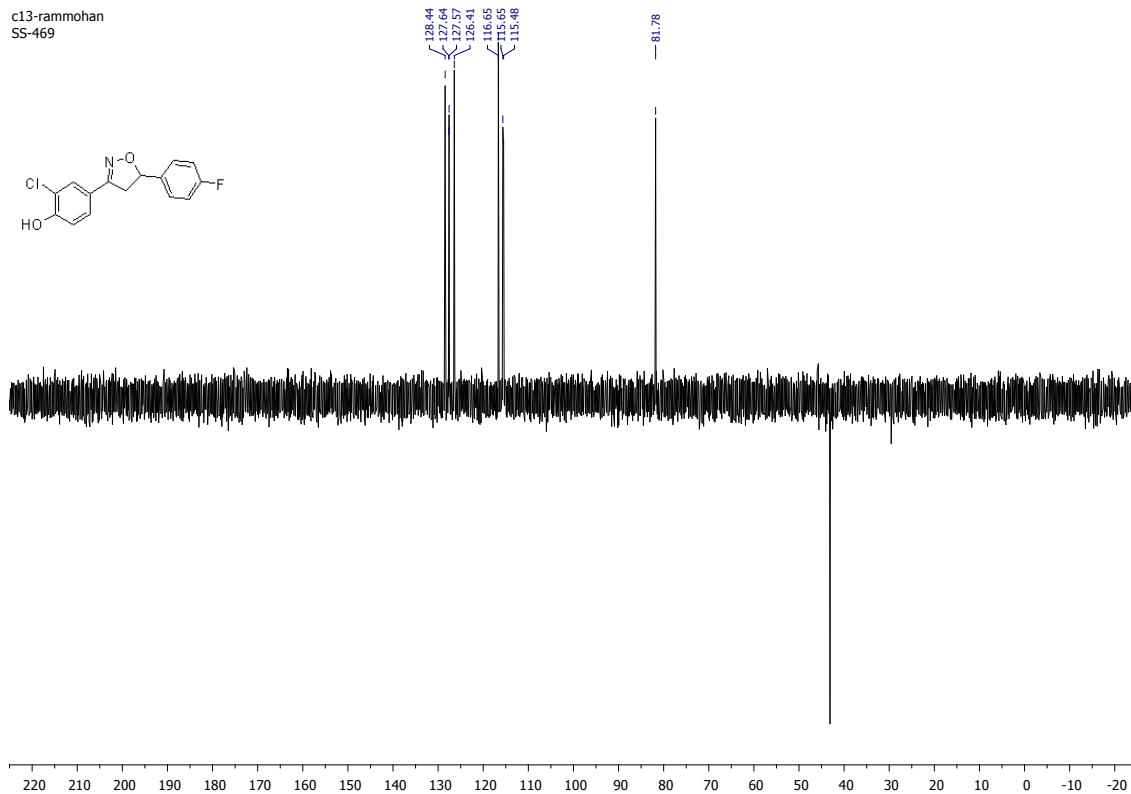

S3. 35.  $^1\text{H}$ ,  $^{13}\text{C}$  and DEPT135 NMR spectra of 3-(5-chlorofuran-2-yl)-5-phenylisoxazole (**7f**)

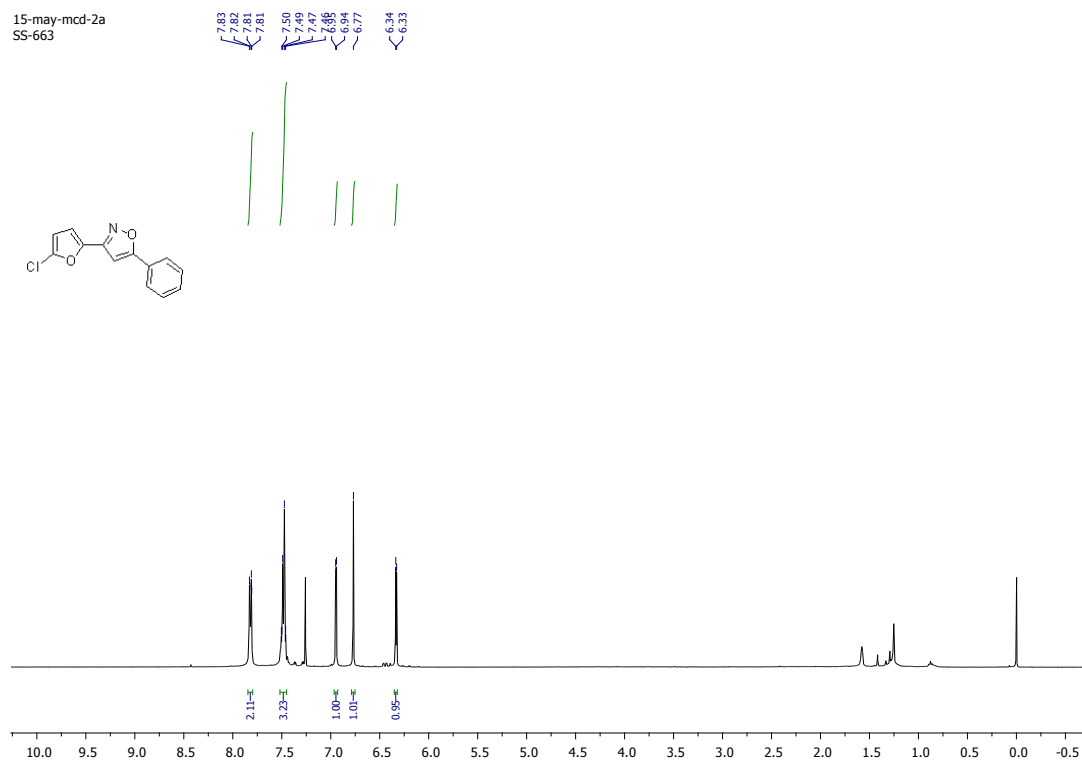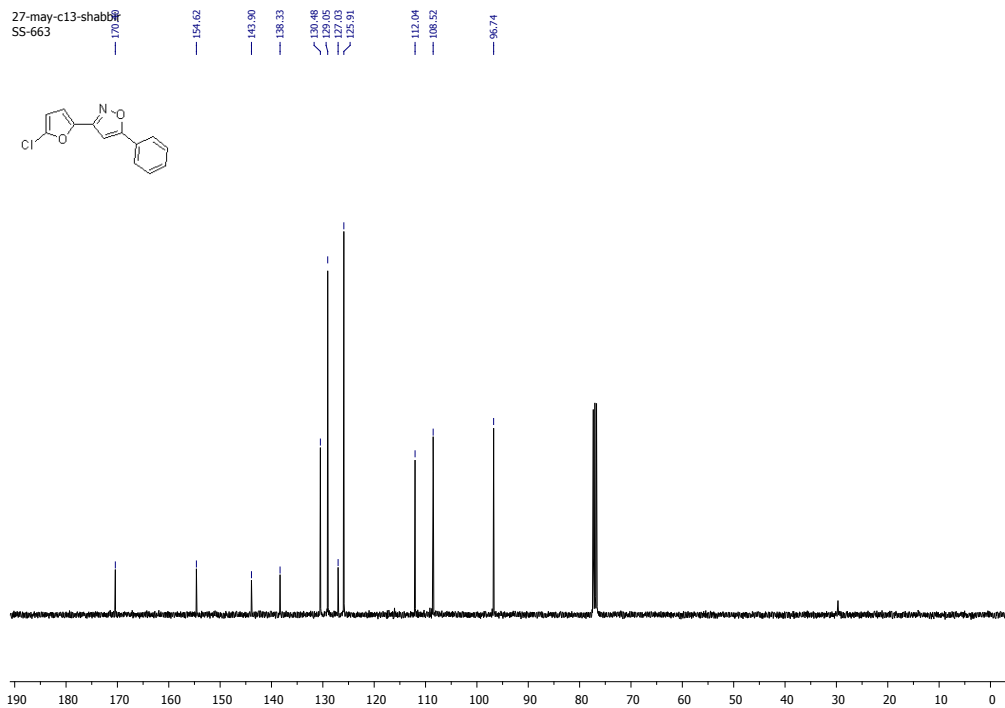

27-may-c13-shabbir  
SS-663

130.48  
129.05  
125.91  
112.04  
106.52  
96.74

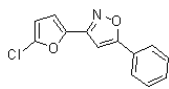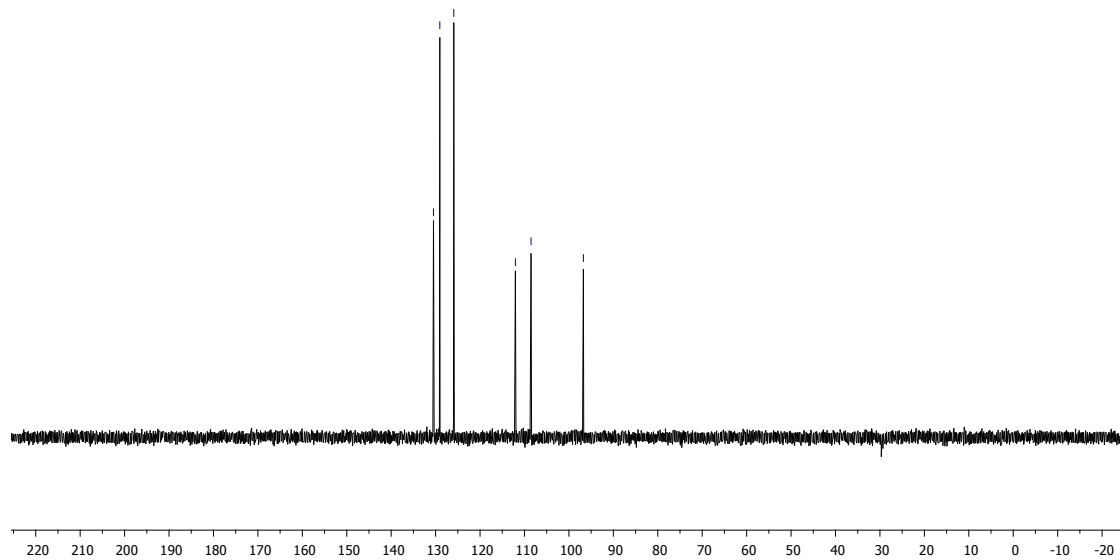

S3. 36.  $^1\text{H}$ ,  $^{13}\text{C}$  and DEPT135 NMR spectra of 3-(5-chlorofuran-2-yl)-5-phenyl-4,5-dihydroisoxazole (7g)

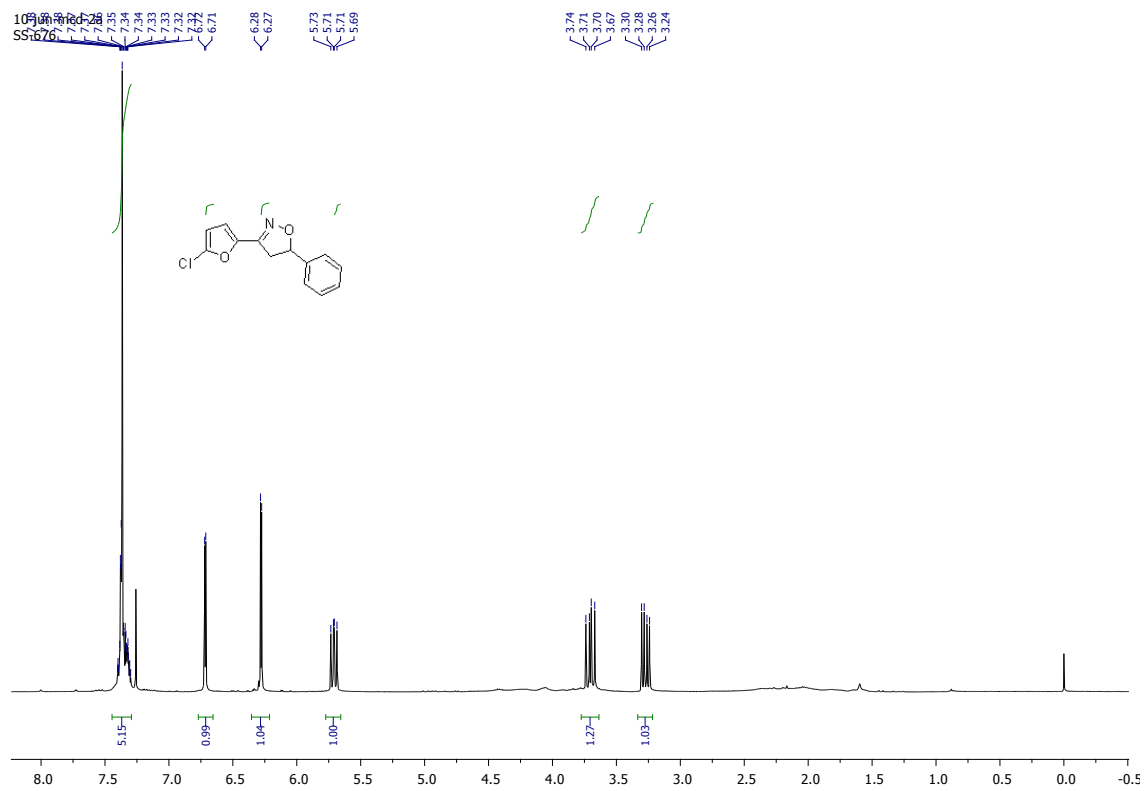

c13-shabeer  
SS-676

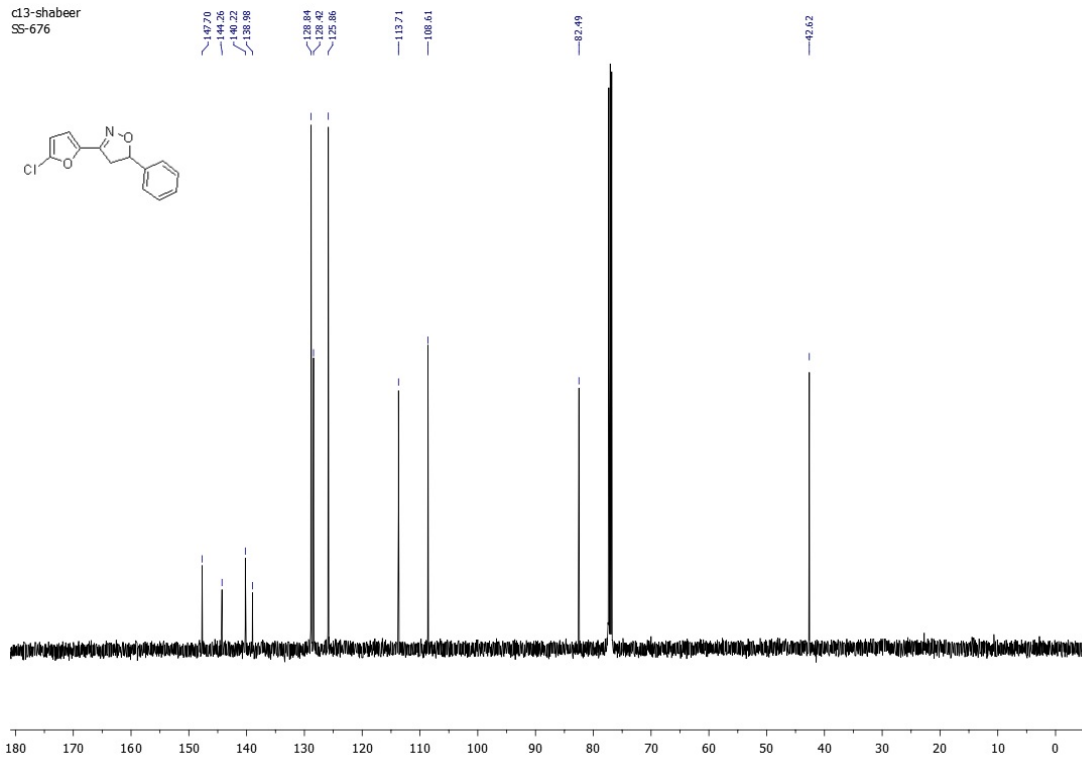

c13-shabeer  
SS-676

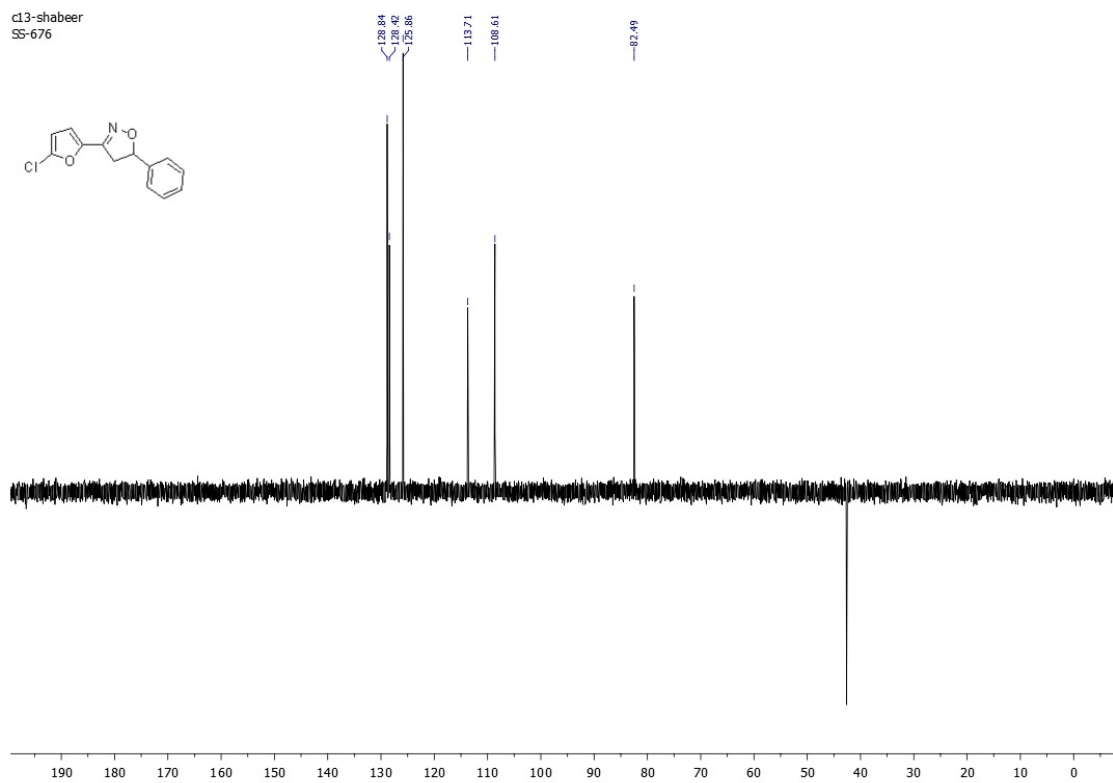

S3. 37.  $^1\text{H}$ ,  $^{13}\text{C}$  and DEPT135 NMR spectra of 3-(3-chloro-4-methoxyphenyl)-5-phenylisoxazole (**7h**)

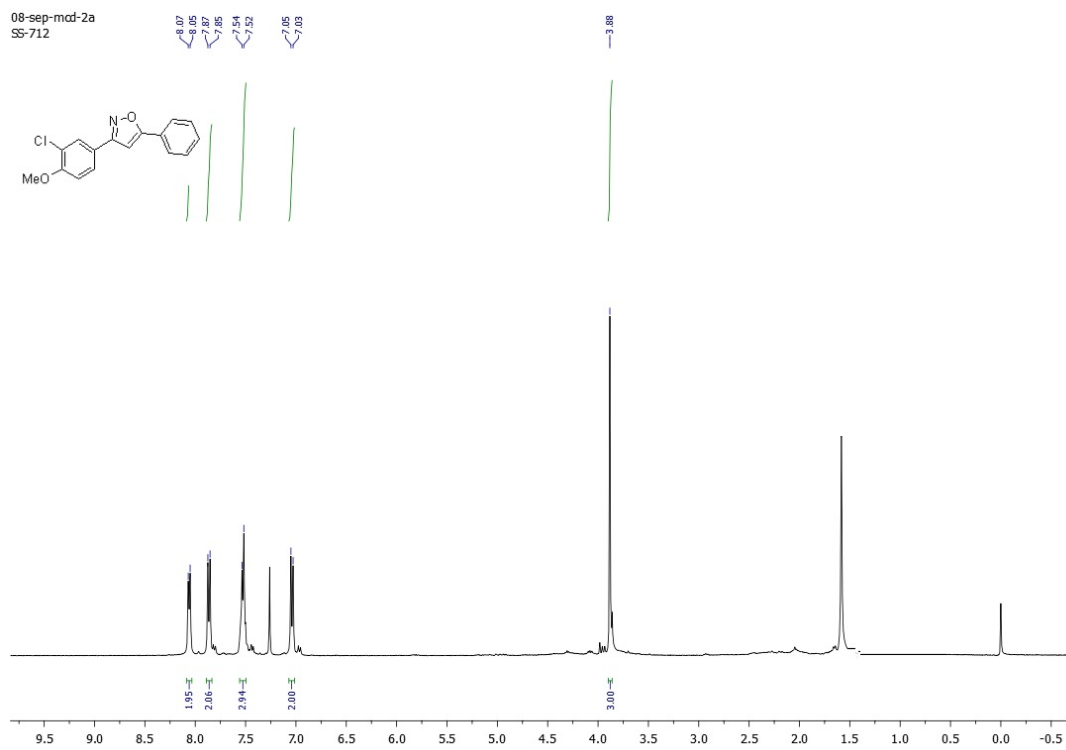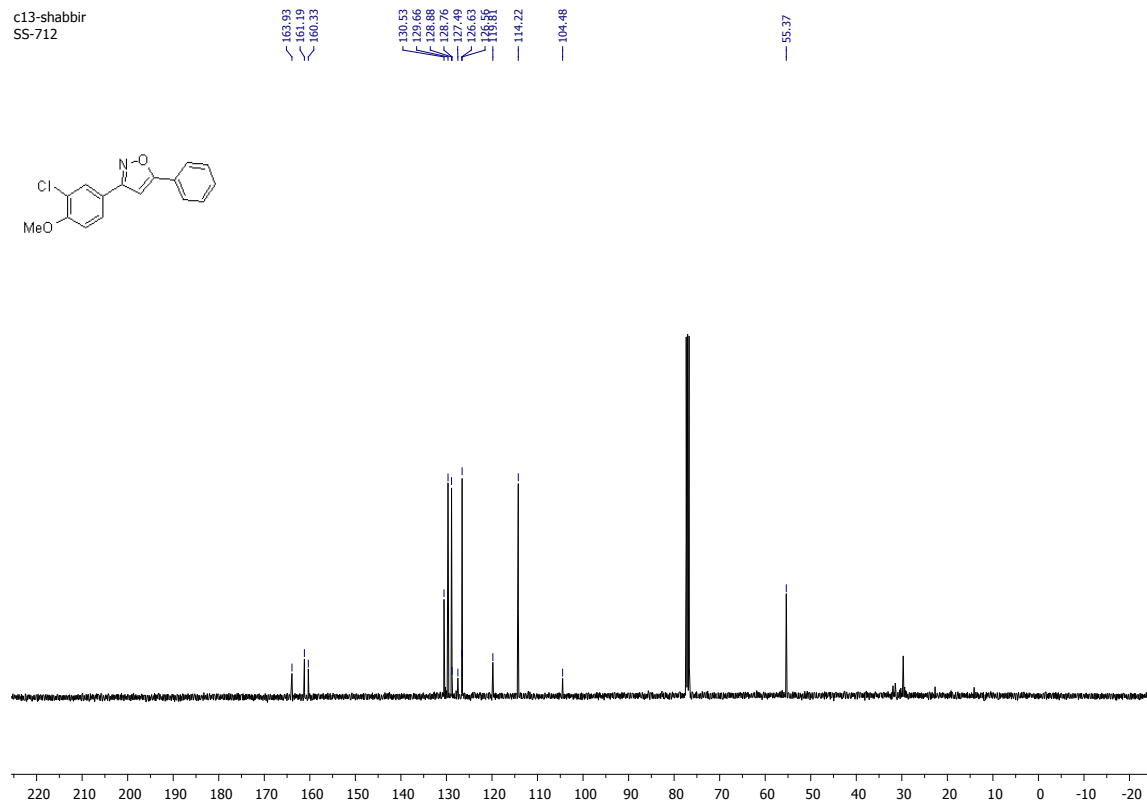



c13-shabbir  
SS-712

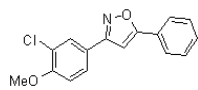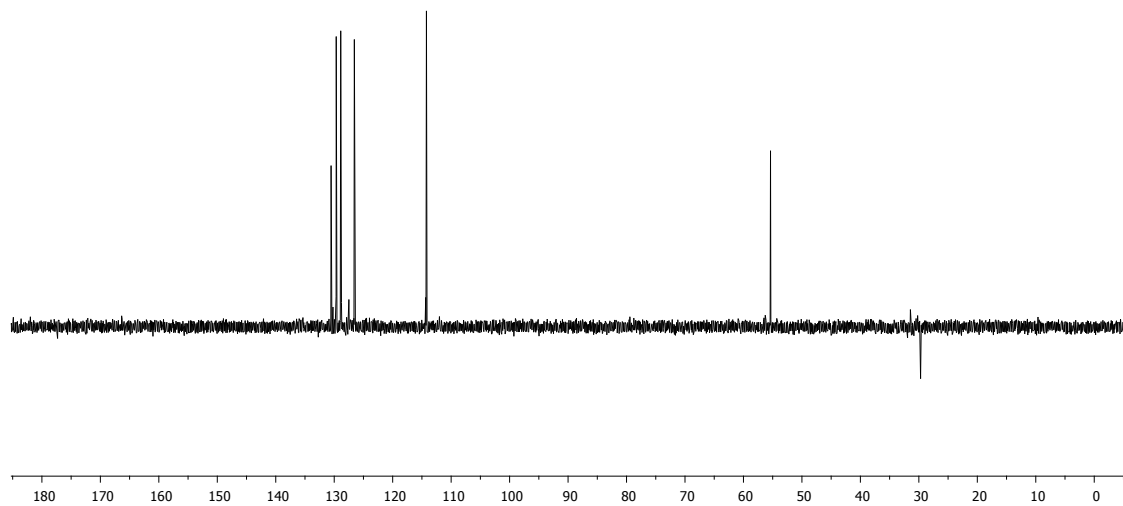

#### S4. LCMS chromatogram at different time intervals.

LC-ESI-MS/MS analysis was carried out on Agilent Triple-Quad LC-MS/MS system (model 6410). Liquid chromatography analyses were carried out using an Agilent 1260 Infinity (Agilent, USA) quaternary pump equipped with an autosampler, column heater and online degasser. A Chromolith C<sub>18</sub> (Merck, Germany) column (55 x 4.6 mm) was used at 30 °C temperature and the injection volume was 10 µl. The elution was carried out with binary solvent system consisting of 0.1% formic acid in water (solvent A) and acetonitrile (solvent B) at a constant flow-rate of 0.5 ml/min. The gradient elution was used, as depicted in Table S4-a.

**Table S4-a.** Gradient details used in LC-ESI-MS/MS analysis

| Time | Solvent A (water – 0.1% formic acid) | Solvent B (acetonitrile) | Flow rate (ml/min) |
|------|--------------------------------------|--------------------------|--------------------|
| 0    | 80                                   | 20                       | 0.5                |
| 8    | 40                                   | 60                       | 0.5                |
| 15   | 40                                   | 60                       | 0.5                |
| 17   | 80                                   | 20                       | 0.5                |
| 20   | 80                                   | 20                       | 0.5                |

Other instrument parameters are listed in Table S4-b.

**Table S4-b.** Instrument parameters during LC-ESI-MS/MS analysis

| Source parameters  |         | Autosampler parameters |            | Quaternary pump parameters |            |
|--------------------|---------|------------------------|------------|----------------------------|------------|
| Gas Temp.          | 300 °C  | Injection volume       | 10 µl      | Run time                   | 15 min     |
| Gas flow           | 8 L/min | Eject speed            | 200 µl/min | Flow rate                  | 0.5 ml/min |
| Nebulizer pressure | 50 psi  | Draw speed             | 200 µl/min | Elution                    | Gradient*  |
| Capillary voltage  | 3000 v  |                        |            |                            |            |
| Cell Acc (v)       | 7 v     |                        |            |                            |            |

\* Gradient system is provided in Table S4-a

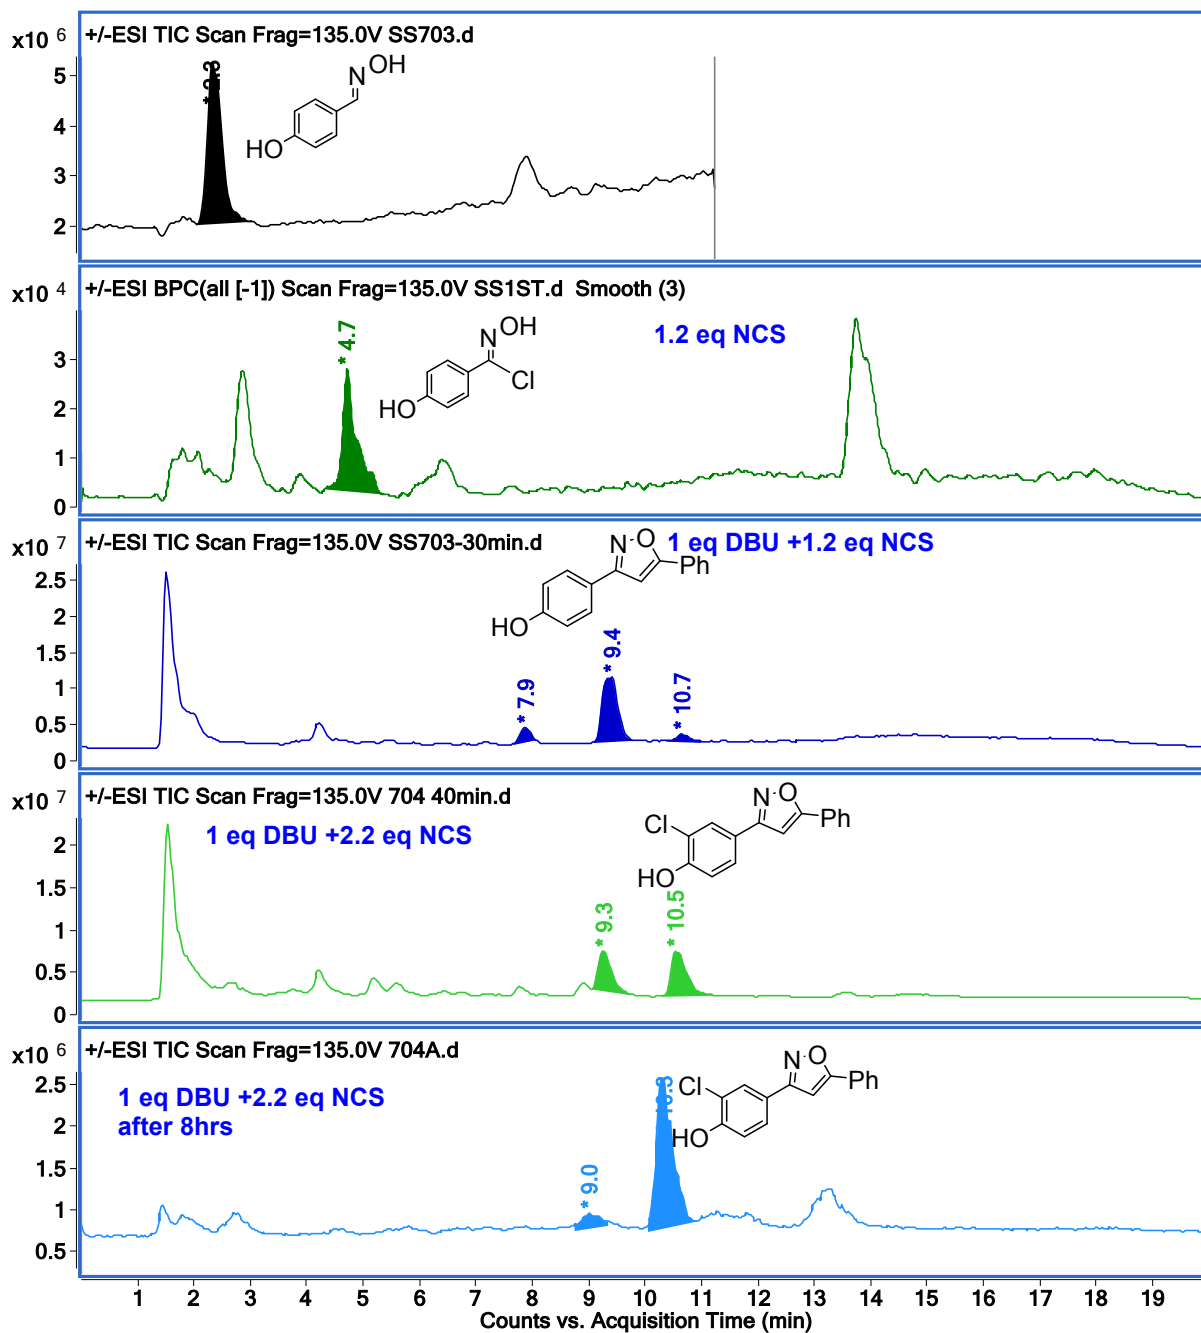

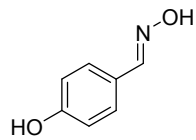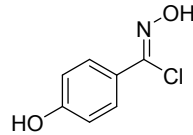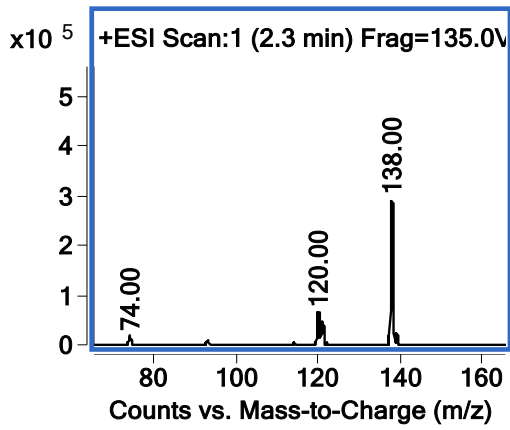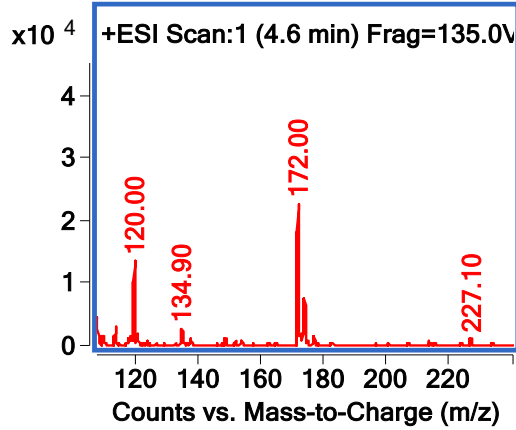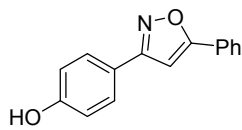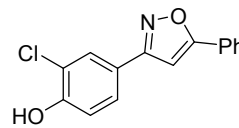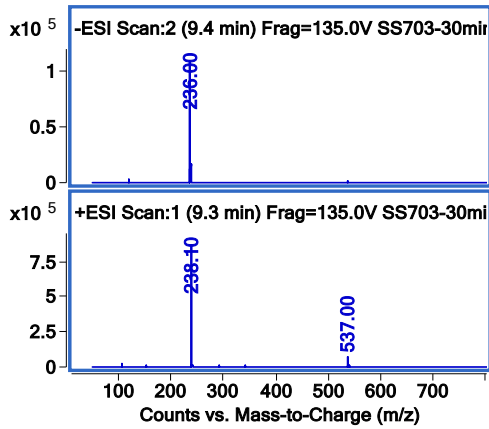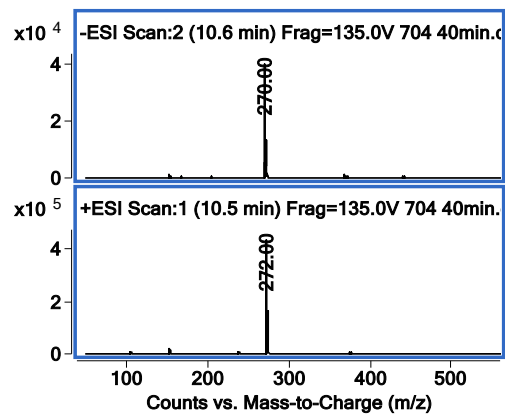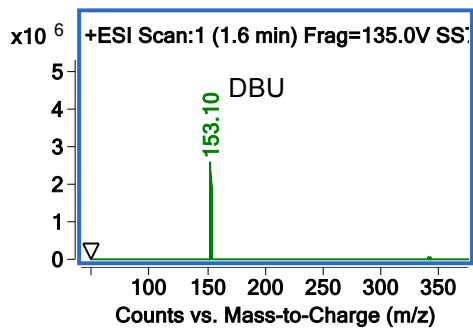

## S5. References associated with ESI

1. M. A. Weidner-Wells, T. C. Henninger, S. A. Fraga-Spano, C. M. Boggs, M. Matheis, D. M. Ritchie, D. C. Argentieri, M. P. Wachter and D. J. Hlasta, *Bioorg. Med. Chem. Lett.* 2004, **14**, 4307–4311.
2. S. Minakata, S. Okumura, T. Nagamachi and Y. Takeda, *Org. Lett.* 2011, **13**, 2966-2969.
3. A. Yoshimura, K. R. Middleton, A. D. Todora, B. J. Kastern, S. R. Koski, A. V. Maskaev and V. V. Zhdankin, *Org. Lett.* 2013, **15**, 4010-4013.
4. R. Harris and J. Huppertz, *Aust. J. Chem.* 1977, **30**, 2225-2240.
5. C. Shen, Y. Zhang, Y. Gan, T. Zhao and Q. Gu, *Lett. Org. Chem.* 2011, **8**, 278-281.
6. S. Tang, J. He, Y. Sun, L. He and X. She, *Org. Lett.* 2009, **11**, 3982-3985.
7. M. Boruah and D. Konwar, *Synth. Commun.* 2012, **42**, 3261-3268.
8. A. Yoshimura, C. Zhu, K. R. Middleton, A. D. Todora, B. J. Kastern, A. V. Maskaev and V. V. Zhdankin, *Chem. Commun.* 2013, **49**, 4800-4802.
9. S. Kanemasa, H. Matsuda, A. Kamimura and T. Kakinami, *Tetrahedron* 2000, **56**, 1057-1064.
